# Supplementary material for: Global, Regional, and National Burden of CKD due to Glomerulonephritis from 1990 to 2019: A Systematic Analysis from the Global Burden of Disease Study 2019
Source: PubMed Central journal article supplement — Clin J Am Soc Nephrol. 2022 Jan 18;18(1):60–71. doi: 10.2215/CJN.0000000000000017 (PMC10101559; doi:10.2215/cjn.0000000000000017), 2022-01-18

## **Supplemental material**

Supplementary methods. Data adjustment, decomposition analysis and frontier analysis.

Supplemental Table 1. ICD10 codes (N02-N06.9) as reference to the diagnosis of CKD due to glomerulonephritis in this study.

Supplemental Table 2. Definition of measurements and metrics.

Supplemental Table 3. R packages used in this study.

Supplemental Table 4. The regional incidence, prevalence, deaths and disability-adjusted life-years of CKD due to glomerulonephritis in 2019, and percentage change from 1990 to 2019.

Supplemental Table 5. The incidence, prevalence, deaths and disability-adjusted life-years of CKD due to glomerulonephritis in 2019, and percentage change from 1990 to 2019 in 204 countries and territories.

Supplemental Table 6. The incidence, prevalence, deaths and disability-adjusted life-years of CKD due to glomerulonephritis in 2019, and percentage change by sociodemographic-index quintiles from 1990 to 2019.

Supplemental Table 7. Change in the disability-adjusted life-years of CKD due to glomerulonephritis decomposed by three population-level determinants: population aging, population growth and epidemiological change from 1990 to 2019 at the regional and national level.

Supplemental Table 8. Frontier age-standardized disability-adjusted life-years and corresponding effective difference of CKD due to glomerulonephritis in 2019 in 204 countries or territories.

Supplemental Figure 1. Age-standardized incidence (A), prevalence (B), deaths (C) and DALYs (D) rates of CKD due to glomerulonephritis per 100,000

population of in 2019 in 21 regions.

Supplemental Figure 2. Percent change of age-standardized incidence (A), prevalence (B), deaths (C) and DALYs (D) rates of CKD due to glomerulonephritis from 1990 to 2019 in 204 countries and territories, for both sexes.

Supplemental Figure 3. Global number of incident cases (A), prevalent cases (B), deaths (C) and DALYs (D) of CKD due to glomerulonephritis in 2019, by sex and age.

## **Supplementary methods**

### **Data adjustment**

In Global Burden and Disease Study (GBD) 2019, the primary data on causes of death were mainly derived from vital registration and verbal autopsy. Data were standardized and mapped according to the GBD causes of death ICD mapping method. ICD 10 codes mapped to CKD include D63.1, E10.2, E11.2, E12.2, E13.2, E14.2, I12-I13.9, N02-N08.8, N15.0, N18-N18.9, Q61-Q62.8. These data were then age-sex split, and appropriate redistribution of garbage code data was performed. Nonspecific codes with unspecified causes were redistributed appropriately to most details causes of CKD with current garbage code redistribution algorithms. Outliers were identified by systematic examination of data points for all location-years. Data points that violated well- established age or time trends or that resulted in extremely high or low cause fractions were determined to be outliers. After excluding outliers, data on causes of death were pooled into the Cause of Death Ensemble model with location-level covariates such as socio-demographic index, mean BMI and diabetes fasting plasma glucose to generate estimated mortality rates. Using Data from end-stage renal disease registries, DisMod- MR (the Bayesian meta-regression tool in GBD 2019) was used to estimate the proportion of CKD mortality for each CKD subtype, including diabetes mellitus type 1, diabetes mellitus type 2, hypertension, glomerulonephritis, and other and unknown causes. Adjusted corresponding proportion was applied to Cause of Death Ensemble model to generate the mortality rate of CKD due to glomerulonephritis. Then the results were processed in CoDCorrect to produce final estimates of years of

life lost adjusted by location, year, age and sex.<sup>1,2</sup>

Literature reviews along with population-based surveys and kidney registry reports were the key sources of incidence and prevalence. DisMod-MR 2.1 model was utilized to produce estimates of CKD by age, gender, location and other covariates. In GBD 2019, CKD was defined by degree of loss of kidney function or receipt of kidney replacement therapy: CKD stages 1&2 (eGFR > 60ml/min/1.73m<sup>2</sup> and ACR > 30 mg/g), CKD Stage 3 (eGFR 30-60ml/min/1.73m<sup>2</sup>), CKD Stage 4 (eGFR 15-30ml/min/1.73m<sup>2</sup>), CKD Stage 5 (eGFR <15ml/min/1.73m<sup>2</sup>, not on kidney replacement therapy), maintenance dialysis, and kidney transplantation. Data from Geisinger Health System in Pennsylvania was utilized to predict the probability of each etiology by age and sex for each stage of CKD (1&2, 3, and 4/5 combined), and then this probability was converted into age-sex-stage-specific etiology proportions. In order to generalize results of Geisinger analysis, a location-specific correction was performed to obtain the final age-sex-location-specific etiology proportions. Data from end-stage kidney registries used to estimate the age-sex- location-specific proportion of each etiology for those on dialysis or with kidney transplants. And then the adjusted corresponding proportion was applied to parent CKD prevalence and incidence to estimate the prevalence and incidence of CKD due to glomerulonephritis.

<sup>1, 2</sup> DW (disability weight) ranging from 0 to 1, where 0 is health and 1 is death, reflected the severity of non-fatal disability caused by a specific disease. Years lived with disability was calculated by multiplying DW and disability duration. Disability-adjusted life-years (DALYs) were the sum of years of life lost and years lived with

disability.

### Decomposition analysis

We used the decomposition methods developed by Das Gupta to decompose the DALYs of CKD due to glomerulonephritis by population aging, population growth and epidemiologic changes.<sup>3,4</sup> DALY is calculated as:

$$DALY_{a,g,e,t} = \sum_{k=1}^{20} a_{k,t} * p_t * e_{k,t},$$

where  $DALY_{a,g,e,t}$  represents DALYs number cumulated by population aging, population growth and epidemiologic changes in year t,  $a_{k,t}$  is the proportion of population for the age group k at year t,  $p_t$  is the population size at year t, and  $e_{k,t}$  is represented by DALYs rate for a specific age group k at year t.

We determined the effect of one factor on DALYs change on the basis that other factors remained unchanged. Therefore, the formula goes as follows if we calculated the contribution of population aging to DALYs change:

$$Effect_{a_{2019}} = \left[ \frac{DALY_{a_{2019},p_{2019},e_{2019}} + DALY_{a_{2019},p_{1990},e_{1990}}}{3} + \frac{DALY_{a_{2019},p_{1990},e_{2019}} + DALY_{a_{2019},p_{2019},e_{1990}}}{6} \right] \\ - \left[ \frac{DALY_{a_{1990},p_{2019},e_{2019}} + DALY_{a_{1990},p_{1990},e_{1990}}}{3} + \frac{DALY_{a_{1990},p_{1990},e_{2019}} + DALY_{a_{1990},p_{2019},e_{1990}}}{6} \right]$$

### Frontier analysis

We carried out an improved data envelopment analysis (DEA) in frontier analysis.<sup>3-</sup>  
<sup>5</sup> DEA is a non-parametric method, which is used to estimate the production boundary under the convexity assumption. “Free disposal hull” (fdh) option was selected to model the ideal achievable age-standardized DALYs on the basis of sociodemographic index. In order to minimize the modelling error as it as possible, 150

bootstrapped samples of the data were put into model with incorporation of year, location and other covariates. Mean age-standardized DALYs for the given sociodemographic index were calculated from 150 bootstrapped sampling. A smooth frontier (span=0.1, degree=1) was then fitted through Loess regression. In the process of boundary generation, outliers were eliminated by excluding super-efficient elements. The distance between the observed age-standardized disability-adjusted life-years and the frontier values, named “effective difference”, was to determine the gap of age-standardized DALYs that could be attained at a given level of development. For example, when the observed rate of a country was far below the frontier value given its sociodemographic index, it implied there might be a great deal of unrecognized opportunities for the country for improvement in terms of age-standardized DALYs. Besides, the change of effective difference for a country over time provided a pattern of the changing burden with sociodemographic index.

### **Supplementary References:**

1. Diseases GBD, Injuries C: Global burden of 369 diseases and injuries in 204 countries and territories, 1990–2019: a systematic analysis for the Global Burden of Disease Study 2019. *Lancet*, 396: 1204–1222, 2020 10.1016/S0140-6736(20)30925-9
2. Collaboration GBDCKD: Global, regional, and national burden of chronic kidney disease, 1990–2017: a systematic analysis for the Global Burden of Disease Study 2017. *Lancet*, 395: 709–733, 2020 10.1016/S0140-6736(20)30045-3
3. Li H, Lu W, Wang A, Jiang H, Lyu J: Changing epidemiology of chronic kidney disease as a result of type 2 diabetes mellitus from 1990 to 2017: Estimates from Global Burden of Disease 2017. *J Diabetes Investig*, 12: 346–356, 2021 10.1111/jdi.13355
4. Xie Y, Bowe B, Mokdad AH, Xian H, Yan Y, Li T, Maddukuri G, Tsai CY, Floyd T, Al-Aly Z: Analysis of the Global Burden of Disease study highlights the global, regional, and national trends of chronic kidney disease epidemiology from 1990 to 2016. *Kidney international*, 94: 567–581, 2018 10.1016/j.kint.2018.04.011

5. Access GBDH, Quality Collaborators. Electronic address cue, Access GBDH, Quality C: Healthcare Access and Quality Index based on mortality from causes amenable to personal health care in 195 countries and territories, 1990–2015: a novel analysis from the Global Burden of Disease Study 2015. *Lancet*, 390: 231–266, 2017 10.1016/S0140-6736(17)30818-8

Supplemental Table 1. ICD10 codes (N02-N06.9) as reference to the diagnosis of CKD due to glomerulonephritis in this study.

| ICD10 codes | Subtypes                                                                                   |
|-------------|--------------------------------------------------------------------------------------------|
| <b>N02</b>  | <b>Recurrent and persistent hematuria</b>                                                  |
| N02.0       | Recurrent and persistent hematuria, minor glomerular abnormality                           |
| N02.1       | Recurrent and persistent hematuria, focal and segmental glomerular lesions                 |
| N02.2       | Recurrent and persistent hematuria, diffuse membranous glomerulonephritis                  |
| N02.3       | Recurrent and persistent hematuria, diffuse mesangial proliferative glomerulonephritis     |
| N02.4       | Recurrent and persistent hematuria, diffuse endocapillary proliferative glomerulonephritis |
| N02.5       | Recurrent and persistent hematuria, diffuse mesangiocapillary glomerulonephritis           |
| N02.6       | Recurrent and persistent hematuria, dense deposit disease                                  |
| N02.7       | Recurrent and persistent hematuria, diffuse crescentic glomerulonephritis                  |
| N02.8       | Recurrent and persistent hematuria, other                                                  |
| N02.9       | Recurrent and persistent hematuria, unspecified                                            |
| <b>N03</b>  | <b>Chronic nephritic syndrome</b>                                                          |
| N03.0       | Chronic nephritic syndrome, minor glomerular abnormality                                   |
| N03.1       | Chronic nephritic syndrome, focal and segmental glomerular lesions                         |
| N03.2       | Chronic nephritic syndrome, diffuse membranous glomerulonephritis                          |
| N03.3       | Chronic nephritic syndrome, diffuse mesangial proliferative glomerulonephritis             |
| N03.4       | Chronic nephritic syndrome, diffuse endocapillary proliferative glomerulonephritis         |
| N03.5       | Chronic nephritic syndrome, diffuse mesangiocapillary glomerulonephritis                   |
| N03.6       | Chronic nephritic syndrome, dense deposit disease                                          |
| N03.7       | Chronic nephritic syndrome, diffuse crescentic glomerulonephritis                          |
| N03.8       | Chronic nephritic syndrome, other                                                          |
| N03.9       | Chronic nephritic syndrome, unspecified                                                    |
| <b>N04</b>  | <b>Nephrotic syndrome</b>                                                                  |
| N04.0       | Nephrotic syndrome, minor glomerular abnormality                                           |
| N04.1       | Nephrotic syndrome, focal and segmental glomerular lesions                                 |
| N04.2       | Nephrotic syndrome, diffuse membranous glomerulonephritis                                  |
| N04.3       | Nephrotic syndrome, diffuse mesangial proliferative glomerulonephritis                     |



---

|            |                                                                                                                  |
|------------|------------------------------------------------------------------------------------------------------------------|
| N04.4      | Nephrotic syndrome, diffuse endocapillary proliferative glomerulonephritis                                       |
| N04.5      | Nephrotic syndrome, diffuse mesangiocapillary glomerulonephritis                                                 |
| N04.6      | Nephrotic syndrome, dense deposit disease                                                                        |
| N04.7      | Nephrotic syndrome, diffuse crescentic glomerulonephritis                                                        |
| N04.8      | Nephrotic syndrome, other                                                                                        |
| N04.9      | Nephrotic syndrome, unspecified                                                                                  |
| <b>N05</b> | <b>Unspecified nephritic syndrome</b>                                                                            |
| N05.0      | Unspecified nephritic syndrome, minor glomerular abnormality                                                     |
| N05.1      | Unspecified nephritic syndrome, focal and segmental glomerular lesions                                           |
| N05.2      | Unspecified nephritic syndrome, diffuse membranous glomerulonephritis                                            |
| N05.3      | Unspecified nephritic syndrome, diffuse mesangial proliferative glomerulonephritis                               |
| N05.4      | Unspecified nephritic syndrome, diffuse endocapillary proliferative glomerulonephritis                           |
| N05.5      | Unspecified nephritic syndrome, diffuse mesangiocapillary glomerulonephritis                                     |
| N05.6      | Unspecified nephritic syndrome, dense deposit disease                                                            |
| N05.7      | Unspecified nephritic syndrome, diffuse crescentic glomerulonephritis                                            |
| N05.8      | Unspecified nephritic syndrome, other                                                                            |
| N05.9      | Unspecified nephritic syndrome, unspecified                                                                      |
| <b>N06</b> | <b>Isolated proteinuria with specified morphological lesion</b>                                                  |
| N06.0      | Isolated proteinuria with specified morphological lesion, minor glomerular abnormality                           |
| N06.1      | Isolated proteinuria with specified morphological lesion, focal and segmental glomerular lesions                 |
| N06.2      | Isolated proteinuria with specified morphological lesion, diffuse membranous glomerulonephritis                  |
| N06.3      | Isolated proteinuria with specified morphological lesion, diffuse mesangial proliferative glomerulonephritis     |
| N06.4      | Isolated proteinuria with specified morphological lesion, diffuse endocapillary proliferative glomerulonephritis |
| N06.5      | Isolated proteinuria with specified morphological lesion, diffuse mesangiocapillary glomerulonephritis           |
| N06.6      | Isolated proteinuria with specified morphological lesion, dense deposit disease                                  |
| N06.7      | Isolated proteinuria with specified morphological lesion, diffuse crescentic glomerulonephritis                  |
| N06.8      | Isolated proteinuria with specified morphological lesion, other                                                  |
| N06.9      | Isolated proteinuria with specified morphological lesion, unspecified                                            |

---

Note, causes of death (CoD) data were mapped and split onto multiple ICD-8, ICD-9,

and ICD-10 detail causes, or targets, based on ICD-detail cause codes to ensure that all subtypes of CKD due to glomerulonephritis were taken into account and all data were classified into correct subtypes to the largest extent.<sup>1</sup> However, we did not validate the sensitivity and specificity of these codes, implying some patient misclassification is possible.

**Supplementary references:**

1. Diseases GBD, Injuries C: Global burden of 369 diseases and injuries in 204 countries and territories, 1990-2019: a systematic analysis for the Global Burden of Disease Study 2019. *Lancet*, 396: 1204-1222, 2020 10.1016/S0140-6736(20)30925-9

Supplemental Table 2. Definition of measurement and metrics

| Measure                        | Number                                                     | Percent                                                                                               | Rate                               |
|--------------------------------|------------------------------------------------------------|-------------------------------------------------------------------------------------------------------|------------------------------------|
| Incidence                      | Number new of cases in the population                      | Proportion of news cases of a particular cause relative to cases from all causes                      | New cases per 100,000 population   |
| Prevalence                     | Total number of cases in the population                    | Proportion of total cases of a particular cause relative to cases from all causes                     | Total cases per 100,000 population |
| Deaths                         | Number of deaths in the population                         | Proportion of deaths for a particular cause relative to deaths from all causes                        | Deaths per 100,000 population      |
| Disability-adjusted life years | Number of disability-adjusted life-years in the population | Proportion of DALYs for a particular cause relative to disability-adjusted life-years from all causes | DALYs per 100,000 population       |

Note, the definitions were obtained from the code book of Global Burden of Diseases Study 2019

Supplemental Table 3. R packages used in our study

|               |
|---------------|
| Package names |
| data.table    |
| dplyr         |
| forcats       |
| ggmap         |
| ggplot2       |
| ggpmisc       |
| ggpubr        |
| ggrepel       |
| ggsci         |
| magrittr      |
| maps          |
| readxl        |
| reshape       |
| rgdal         |
| tidyr         |

Supplemental Table 4. The regional incidence, prevalence, deaths and disability-adjusted life-years of CKD due to glomerulonephritis in 2019, and percentage change from 1990 to 2019

|                | Incidence                             |                                                                 |                                                                            | Prevalence                            |                                                                 |                                                                            | Deaths                                |                                                                 |                                                                            | Disability-adjusted life-years        |                                                                 |                                                                            |
|----------------|---------------------------------------|-----------------------------------------------------------------|----------------------------------------------------------------------------|---------------------------------------|-----------------------------------------------------------------|----------------------------------------------------------------------------|---------------------------------------|-----------------------------------------------------------------|----------------------------------------------------------------------------|---------------------------------------|-----------------------------------------------------------------|----------------------------------------------------------------------------|
|                | Number in 2019<br>(×1000) (95%<br>UI) | Age-<br>standardized<br>rate per 100,000<br>in 2019 (95%<br>UI) | Change of age-<br>standardized<br>rate between<br>1990 and 2019<br>(95%UI) | Number in 2019<br>(×1000) (95%<br>UI) | Age-<br>standardized<br>rate per 100,000<br>in 2019 (95%<br>UI) | Change of age-<br>standardized<br>rate between<br>1990 and 2019<br>(95%UI) | Number in 2019<br>(×1000) (95%<br>UI) | Age-<br>standardized<br>rate per 100,000<br>in 2019 (95%<br>UI) | Change of age-<br>standardized<br>rate between<br>1990 and 2019<br>(95%UI) | Number in 2019<br>(×1000) (95%<br>UI) | Age-<br>standardized<br>rate per 100,000<br>in 2019 (95%<br>UI) | Change of age-<br>standardized<br>rate between<br>1990 and 2019<br>(95%UI) |
| East Asia      | 77.9<br>(70-86.8)                     | 5.2<br>(4.7-5.9)                                                | -3%<br>(-7%-0%)                                                            | 3171.7<br>(2898-3471.2)               | 187.5<br>(170.7-206)                                            | 1%<br>(-1%-4%)                                                             | 18.2<br>(13-24.8)                     | 1<br>(0.7-1.3)                                                  | -24%<br>(-39%--8%)                                                         | 704.1<br>(551.8-878.9)                | 38.1<br>(30.4-47.4)                                             | -30%<br>(-41%--18%)                                                        |
| Southeast Asia | 61.1<br>(55.2-67.9)                   | 9.3<br>(8.4-10.3)                                               | 36%<br>(32%-40%)                                                           | 1937.8<br>(1775.7-2111.2)             | 275.9<br>(253.3-300.4)                                          | 25%<br>(22%-28%)                                                           | 8.2<br>(6.2-10.7)                     | 1.4<br>(1.1-1.8)                                                | -7%<br>(-19%-5%)                                                           | 467.2<br>(374.9-581.9)                | 68.3<br>(55.5-84)                                               | -5%<br>(-16%-7%)                                                           |
| Oceania        | 1.2<br>(0.9-1.6)                      | 8.2<br>(6.3-10.8)                                               | 21%<br>(14%-29%)                                                           | 31.7<br>(26.1-38.7)                   | 254<br>(214.3-302.6)                                            | 18%<br>(13%-23%)                                                           | 0.1<br>(0.1-0.2)                      | 1.8<br>(1.3-2.4)                                                | 11%<br>(-10%-36%)                                                          | 9.5<br>(7.1-12.3)                     | 82.7<br>(62.7-107.3)                                            | 13%<br>(-4%-32%)                                                           |
| Central Asia   | 11.1<br>(9.1-13.5)                    | 11.7<br>(9.5-14.2)                                              | 41%<br>(36%-47%)                                                           | 276.8<br>(238.6-318.3)                | 288.2<br>(248.7-330.1)                                          | 28%<br>(23%-32%)                                                           | 1.6<br>(1.2-2)                        | 2<br>(1.5-2.6)                                                  | 32%<br>(11%-53%)                                                           | 77.7<br>(61-96.7)                     | 85.1<br>(67.2-105.1)                                            | 18%<br>(4%-31%)                                                            |
| Central Europe | 8.6<br>(7.7-9.5)                      | 6.8<br>(6-7.7)                                                  | 22%<br>(19%-25%)                                                           | 239.1<br>(219.7-259)                  | 179.3<br>(162.7-197.3)                                          | 11%<br>(9%-13%)                                                            | 2.5<br>(1.8-3.4)                      | 1.2<br>(0.9-1.6)                                                | -33%<br>(-42%--22%)                                                        | 71.2<br>(56.4-89.8)                   | 43.2<br>(34.8-53.1)                                             | -37%<br>(-44%--29%)                                                        |
| Eastern Europe | 20.5                                  | 10.5                                                            | 34%                                                                        | 646.8                                 | 287.9                                                           | 16%                                                                        | 4.8                                   | 1.5                                                             | 2%                                                                         | 153.8                                 | 57.2                                                            | -10%                                                                       |

|                           |             |             |           |               |               |           |             |            |             |               |               |             |
|---------------------------|-------------|-------------|-----------|---------------|---------------|-----------|-------------|------------|-------------|---------------|---------------|-------------|
|                           | (18.3-23)   | (9.3-11.9)  | (29%-38%) | (592.4-709)   | (260.3-319.4) | (12%-19%) | (3.8-5.9)   | (1.2-1.8)  | (-10%-13%)  | (129.4-179.1) | (48.8-66.1)   | (-18%--2%)  |
| High-income               | 15.3        | 6.3         | -2%       | 400.8         | 165.6         | -4%       | 2.7         | 0.5        | -47%        | 68.4          | 21.6          | -45%        |
| Asia Pacific              | (14-16.8)   | (5.7-7.1)   | (-5%-0%)  | (372-432.8)   | (150.8-182.7) | (-6%--2%) | (1.8-3.9)   | (0.4-0.7)  | (-53%--42%) | (54.8-84.8)   | (17.7-26)     | (-50%--41%) |
| Australasia               | 1.8         | 5.2         | 18%       | 49.8          | 146.1         | 15%       | 1.6         | 2.9        | 10%         | 26.7          | 57.7          | 10%         |
|                           | (1.5-2.1)   | (4.2-6.5)   | (12%-25%) | (43.7-58)     | (124-174)     | (11%-21%) | (1.1-2.1)   | (2.1-3.8)  | (-14%-34%)  | (21.4-32.6)   | (47.4-68.8)   | (-5%-27%)   |
| Western Europe            | 23.5        | 4.3         | 5%        | 633.6         | 119.8         | 4%        | 12.7        | 1.2        | 6%          | 212.9         | 26.9          | -13%        |
|                           | (21.4-25.9) | (3.8-4.8)   | (2%-8%)   | (583.9-689.6) | (108.8-132.9) | (2%-6%)   | (8.1-18.9)  | (0.8-1.6)  | (-6%-20%)   | (162.8-275.4) | (21.9-33.1)   | (-19%--7%)  |
| Southern Latin America    | 4.3         | 6.2         | 20%       | 114.6         | 161.2         | 12%       | 1.6         | 1.9        | 9%          | 43.8          | 56.7          | -2%         |
|                           | (3.5-5.1)   | (5.1-7.7)   | (14%-27%) | (98.6-132.5)  | (137.4-189.2) | (8%-16%)  | (1.2-2.2)   | (1.4-2.6)  | (-1%-20%)   | (34.7-54.4)   | (45.1-69.9)   | (-9%-5%)    |
| High-income North America | 29.8        | 7.4         | -1%       | 847.4         | 206           | 2%        | 11.3        | 1.8        | 20%         | 315.6         | 62.5          | 24%         |
|                           | (27.1-32.7) | (6.6-8.1)   | (-4%-3%)  | (779.9-918.6) | (187.6-226.9) | (-1%-5%)  | (8.3-15.2)  | (1.4-2.4)  | (1%-42%)    | (256-393.5)   | (51.2-76.1)   | (12%-36%)   |
| Caribbean                 | 5           | 10.5        | 49%       | 125.1         | 257           | 34%       | 2.4         | 4.7        | 32%         | 89.2          | 178.7         | 29%         |
|                           | (4.3-5.8)   | (9-12.4)    | (40%-57%) | (112.2-139.5) | (229.9-287.4) | (28%-40%) | (1.8-3.2)   | (3.5-6.3)  | (11%-55%)   | (69.4-111.3)  | (139.8-222.8) | (10%-50%)   |
| Andean Latin America      | 5.8         | 9.4         | 63%       | 150.2         | 237.7         | 42%       | 3.4         | 6          | 26%         | 104.9         | 175.7         | 9%          |
|                           | (4.8-7.1)   | (7.7-11.4)  | (56%-70%) | (127.1-176.5) | (202.3-277.9) | (36%-49%) | (2.4-4.6)   | (4.3-8.2)  | (2%-54%)    | (79.4-135.4)  | (132.4-227.5) | (-11%-32%)  |
| Central Latin America     | 41.1        | 16.6        | 58%       | 965.7         | 379.3         | 43%       | 22.5        | 9.4        | 94%         | 756.2         | 303.9         | 81%         |
|                           | (37.2-45.4) | (15.1-18.3) | (51%-66%) | (881.2-1051)  | (347.1-412.5) | (38%-49%) | (17.1-28.9) | (7.2-12.2) | (67%-120%)  | (607.7-921.4) | (243.9-372.1) | (59%-104%)  |
| Tropical Latin America    | 20          | 9           | 21%       | 509.3         | 216.8         | 17%       | 8.9         | 3.7        | -9%         | 278.2         | 114.6         | -16%        |
|                           | (18-22.3)   | (8.1-10.1)  | (17%-25%) | (464.6-561.3) | (197.1-239.6) | (15%-20%) | (7-11)      | (2.9-4.6)  | (-15%--2%)  | (232.2-330.3) | (95.6-135.5)  | (-22%--11%) |

|                              |                        |                   |                  |                           |                        |                  |                     |                  |                    |                         |                        |                    |
|------------------------------|------------------------|-------------------|------------------|---------------------------|------------------------|------------------|---------------------|------------------|--------------------|-------------------------|------------------------|--------------------|
| North Africa and Middle East | 77.4<br>(69.2-86.8)    | 13.4<br>(12-14.9) | 64%<br>(58%-70%) | 1669.2<br>(1510.2-1844.2) | 280.6<br>(255.5-307.4) | 46%<br>(42%-50%) | 7.1<br>(5.2-9.5)    | 1.7<br>(1.2-2.3) | -17%<br>(-31%--1%) | 346.7<br>(271-432.8)    | 64<br>(50.2-79.8)      | -10%<br>(-22%-3%)  |
| South Asia                   | 128.4<br>(114.8-142.4) | 7.3<br>(6.6-8.1)  | 10%<br>(7%-12%)  | 3863.7<br>(3524.1-4191.2) | 214.4<br>(196.5-232.2) | 11%<br>(9%-13%)  | 47.1<br>(35.5-60.8) | 3.4<br>(2.5-4.4) | -12%<br>(-27%-8%)  | 1870.7<br>(1480.6-2347) | 112.9<br>(89.3-140.2)  | -11%<br>(-24%-5%)  |
| Central Sub-Saharan Africa   | 7.2<br>(5.2-9.8)       | 5<br>(3.9-6.4)    | 23%<br>(17%-29%) | 170.5<br>(138.2-213)      | 143.9<br>(121.1-172.8) | 17%<br>(13%-22%) | 2.7<br>(2-3.6)      | 4.1<br>(2.9-5.5) | -19%<br>(-35%-0%)  | 133.9<br>(101-174.3)    | 136.3<br>(101.4-175.9) | -22%<br>(-37%--4%) |
| Eastern Sub-Saharan Africa   | 21.3<br>(18.4-24.6)    | 4.7<br>(4.2-5.3)  | 17%<br>(15%-20%) | 534.8<br>(478.1-596.1)    | 146<br>(132.9-159.9)   | 16%<br>(14%-18%) | 9.9<br>(8-12.2)     | 5.1<br>(3.9-6.4) | -12%<br>(-23%-0%)  | 460.5<br>(376-558.1)    | 155.8<br>(127.8-189.1) | -19%<br>(-29%--5%) |
| Southern Sub-Saharan Africa  | 6.7<br>(5.8-7.8)       | 8.7<br>(7.6-10)   | 24%<br>(20%-28%) | 169<br>(150.5-188.9)      | 216.5<br>(194.3-240.6) | 22%<br>(19%-24%) | 2.8<br>(2.2-3.6)    | 4.9<br>(3.7-6.4) | 16%<br>(1%-32%)    | 109<br>(87.7-133.4)     | 156.2<br>(124.6-189.4) | 4%<br>(-9%-16%)    |
| Western Sub-Saharan Africa   | 38.6<br>(33.9-43.4)    | 7.6<br>(6.8-8.3)  | -3%<br>(-7%-0%)  | 800.5<br>(724.2-887)      | 189.3<br>(173.3-207)   | 20%<br>(18%-22%) | 11.5<br>(8.7-14.9)  | 4.6<br>(3.4-5.9) | -8%<br>(-25%-11%)  | 600.6<br>(451.5-777.4)  | 160.4<br>(123.3-204.7) | -15%<br>(-31%-3%)  |

Supplemental Table 5. The incidence, prevalence, deaths and disability-adjusted life-years of CKD due to glomerulonephritis in 2019, and percentage change from 1990 to 2019 in 204 countries and territories.

|                                                | Incidence                             |                                                                 |                                                                             | Prevalence                             |                                                                 |                                                                             | Deaths                                |                                                                 |                                                                             | Disability-adjusted life-years        |                                                                 |                                                                             |
|------------------------------------------------|---------------------------------------|-----------------------------------------------------------------|-----------------------------------------------------------------------------|----------------------------------------|-----------------------------------------------------------------|-----------------------------------------------------------------------------|---------------------------------------|-----------------------------------------------------------------|-----------------------------------------------------------------------------|---------------------------------------|-----------------------------------------------------------------|-----------------------------------------------------------------------------|
|                                                | Number in 2019<br>(×1000)<br>(95% UI) | Age-<br>standardized<br>rate per 100,000<br>in 2019<br>(95% UI) | Change of age-<br>standardized<br>rate between<br>1990 and 2019<br>(95% UI) | Number in 2019<br>(×1000)<br>(95% UI)  | Age-<br>standardized<br>rate per 100,000<br>in 2019<br>(95% UI) | Change of age-<br>standardized<br>rate between<br>1990 and 2019<br>(95% UI) | Number in 2019<br>(×1000)<br>(95% UI) | Age-<br>standardized<br>rate per 100,000<br>in 2019<br>(95% UI) | Change of age-<br>standardized<br>rate between<br>1990 and 2019<br>(95% UI) | Number in 2019<br>(×1000)<br>(95% UI) | Age-<br>standardized<br>rate per 100,000<br>in 2019<br>(95% UI) | Change of age-<br>standardized<br>rate between<br>1990 and 2019<br>(95% UI) |
| China                                          | 73722.2<br>(66281-82103)              | 5.1<br>(4.6-5.8)                                                | -5%<br>(-8%--1%)                                                            | 3029967.6<br>(2764130.1-<br>3322028.2) | 185.3<br>(168.3-204.2)                                          | 0.3%<br>(-2%-3%)                                                            | 17390<br>(12363.1-<br>23823.4)        | 1<br>(0.7-1.3)                                                  | -24%<br>(-40%--8%)                                                          | 670006.6<br>(522610-<br>839076.3)     | 37.5<br>(29.8-46.7)                                             | -31%<br>(-42%--19%)                                                         |
| Democratic<br>People's<br>Republic of<br>Korea | 1809.1<br>(1351.5-<br>2361.5)         | 7.1<br>(5-9.6)                                                  | 13%<br>(8%-18%)                                                             | 64721.2<br>(53348.1-<br>79008.6)       | 225.2<br>(182.3-281)                                            | 10%<br>(6%-14%)                                                             | 330.4<br>(234.6-473)                  | 1.1<br>(0.8-1.5)                                                | -14%<br>(-36%-16%)                                                          | 16460.7<br>(12398.7-<br>21954.8)      | 54.3<br>(41.4-71.9)                                             | -12%<br>(-32%-12%)                                                          |
| Taiwan<br>(Province of<br>China)               | 2385.6<br>(1929.7-<br>2905.1)         | 9.2<br>(7-11.9)                                                 | 29%<br>(21%-38%)                                                            | 76999.7<br>(65142.7-<br>90700.4)       | 272.9<br>(222.1-334)                                            | 33%<br>(25%-41%)                                                            | 468.3<br>(303.7-711.4)                | 1.2<br>(0.8-1.8)                                                | -25%<br>(-42%--6%)                                                          | 17658.1<br>(13312.6-<br>22915.9)      | 51.9<br>(39.2-66.4)                                             | -1%<br>(-18%-17%)                                                           |
| Cambodia                                       | 1173.2<br>(792.5-1632.9)              | 7.1<br>(4.9-9.8)                                                | 35%<br>(29%-43%)                                                            | 37632.7<br>(29517.4-<br>45748.0)       | 228.8<br>(182.6-289.1)                                          | 24%<br>(19%-31%)                                                            | 114.8<br>(81.2-157.1)                 | 0.9<br>(0.6-1.2)                                                | -27%<br>(-46%--7%)                                                          | 8084.7<br>(6126.9-<br>10042.5)        | 50.3<br>(38.3-64.2)                                             | -24%<br>(-40%--4%)                                                          |



|                                        |                                |                     |                  |                                     |                        |                  |                               |                  |                     |                                    |                       |                     |
|----------------------------------------|--------------------------------|---------------------|------------------|-------------------------------------|------------------------|------------------|-------------------------------|------------------|---------------------|------------------------------------|-----------------------|---------------------|
|                                        |                                |                     |                  | 48303.6)                            |                        |                  |                               |                  |                     | 10462.1)                           |                       |                     |
|                                        | 21146.3                        |                     | 32%              | 744052.7                            |                        | 24%              |                               |                  | -12%                | 175999.8                           |                       | -11%                |
| Indonesia                              | (18609.5-<br>23807.5)          | 8.5<br>(7.5-9.6)    | (28%-36%)        | (671973.2-<br>818591.4)             | 273<br>(247.2-299.4)   | (21%-27%)        | 2815.9<br>(2118.3-3768)       | 1.3<br>(1-1.7)   | (-28%-6%)           | (137687.9-<br>220426.9)            | 66.8<br>(52.7-83.4)   | (-25%-5%)           |
| Lao People's<br>Democratic<br>Republic | 690.4<br>(466-952.1)           | 9.7<br>(6.9-12.9)   | 28%<br>(23%-33%) | 19331.8<br>(15010.7-<br>24613.6)    | 276.3<br>(220.8-341.3) | 25%<br>(20%-31%) | 84.1<br>(56.9-117.2)          | 1.7<br>(1.2-2.4) | -26%<br>(-45%--2%)  | 5279.9<br>(3869.9-<br>7082.8)      | 80.5<br>(60-107)      | -25%<br>(-42%--2%)  |
| Malaysia                               | 2754<br>(2044.2-<br>3630.2)    | 9.1<br>(6.7-12)     | 46%<br>(39%-53%) | 84228.3<br>(66975.7-<br>104166.5)   | 260.7<br>(208.6-320.3) | 32%<br>(26%-40%) | 233.2<br>(159-334.7)          | 0.9<br>(0.6-1.3) | -4%<br>(-26%-20%)   | 14870.3<br>(11304.5-<br>19344.3)   | 47.7<br>(36.5-61.4)   | 7%<br>(-10%-25%)    |
| Maldives                               | 45.7<br>(32.9-61.2)            | 9.9<br>(7.4-12.9)   | 38%<br>(30%-49%) | 1467.5<br>(1142.2-<br>1872.9)       | 277.5<br>(222.4-343.9) | 27%<br>(20%-33%) | 3.8<br>(2.7-5.2)              | 1.3<br>(0.9-1.8) | -45%<br>(-59%--31%) | 241.8<br>(179.8-318)               | 51.7<br>(40.2-66.7)   | -38%<br>(-51%--25%) |
| Myanmar                                | 5523.3<br>(3775.9-<br>7770.1)  | 10.2<br>(6.9-14.3)  | 29%<br>(23%-36%) | 163647.1<br>(128642.4-<br>204499.1) | 293.4<br>(231.6-363.7) | 27%<br>(22%-32%) | 627.5<br>(439.8-875.4)        | 1.3<br>(0.9-1.8) | -24%<br>(-45%-6%)   | 43627.4<br>(32590.6-<br>58683.4)   | 79.6<br>(60.3-106.4)  | -19%<br>(-39%-9%)   |
| Philippines                            | 12815.9<br>(11622.4-<br>14276) | 11.4<br>(10.4-12.6) | 53%<br>(50%-56%) | 335853.6<br>(307430-<br>368605.9)   | 306.9<br>(281.7-335.1) | 35%<br>(32%-38%) | 2123.1<br>(1516.6-<br>2815.3) | 2.5<br>(1.8-3.4) | 16%<br>(-7%-42%)    | 111504.1<br>(87076.5-<br>142616.8) | 108.7<br>(85.2-138.4) | 28%<br>(8%-49%)     |
| Sri Lanka                              | 2200.6<br>(1670-2828)          | 9.9<br>(7.3-13.2)   | 39%<br>(32%-47%) | 64817.5<br>(53747.9-<br>76499.1)    | 278.6<br>(226.4-339.3) | 29%<br>(23%-35%) | 211.1<br>(138.2-317)          | 0.9<br>(0.6-1.4) | -16%<br>(-38%-13%)  | 11884.5<br>(8747-15607)            | 50.7<br>(37.5-66.7)   | -2%<br>(-20%-21%)   |

|                                        |                 |                  |           | 77523.8)            |                        |           |                          |                  |            |                   |                     |            |
|----------------------------------------|-----------------|------------------|-----------|---------------------|------------------------|-----------|--------------------------|------------------|------------|-------------------|---------------------|------------|
|                                        | 7895.5          |                  | 18%       | 238894.8            |                        | 10%       |                          |                  | -19%       | 45378.5           |                     | -22%       |
| Thailand                               | (6277.1-9786.9) | 10.9<br>(8-14.5) | (10%-29%) | (196214.1-282861.7) | 299.3<br>(238.7-367.4) | (5%-16%)  | 1020.9<br>(678.2-1471.6) | 1.1<br>(0.7-1.6) | (-42%-10%) | (34051.3-59500.9) | 53.5<br>(40.7-69.7) | (-39%--2%) |
|                                        | 106.2           | 8                | 35%       | 2912.7              | 244.3                  | 25%       | 10.9                     | 1.3              | -8%        | 648               | 57.4                | -9%        |
| Timor-Leste                            | (72.2-152.2)    | (5.8-10.9)       | (29%-40%) | (2245.6-3753.6)     | (194.4-303.4)          | (20%-31%) | (7-15.4)                 | (0.8-1.8)        | (-33%-22%) | (440.5-859.3)     | (40.1-76.3)         | (-33%-19%) |
|                                        | 6437.2          | 6.9              | 43%       | 236325.8            | 227.2                  | 26%       | 900.6                    | 1.1              | -11%       | 47079.1           | 47.5                | -5%        |
| Viet Nam                               | (4678.3-8768.3) | (4.9-9.6)        | (35%-51%) | (186849-297562.7)   | (178.6-284.4)          | (20%-32%) | (630.9-1232.3)           | (0.7-1.5)        | (-38%-16%) | (34920.6-60987)   | (35.3-60.9)         | (-25%-18%) |
|                                        | 106.1           | 11.7             | 25%       | 3070.1              | 332.7                  | 21%       | 21.9                     | 3.1              | 33%        | 1105              | 127.1               | 30%        |
| Fiji                                   | (74.8-142.8)    | (8.3-15.6)       | (19%-31%) | (2480.1-3773.4)     | (270-407.6)            | (16%-27%) | (14.9-31.6)              | (2.2-4.4)        | (-2%-76%)  | (811.6-1475.3)    | (94.4-168.1)        | (4%-65%)   |
|                                        | 14.7            | 11.9             | 28%       | 364.6               | 320.3                  | 23%       | 3.2                      | 4.1              | 26%        | 177.3             | 173.7               | 24%        |
| Kiribati                               | (9.5-21.9)      | (8-17.2)         | (23%-33%) | (279.9-464.4)       | (254.4-397.6)          | (19%-28%) | (2.1-4.8)                | (2.8-5.8)        | (-9%-65%)  | (126.8-242.6)     | (124.9-235.9)       | (-4%-57%)  |
|                                        | 6.6             | 11.7             | 34%       | 174.5               | 312.2                  | 27%       | 1.5                      | 3.9              | 35%        | 78.2              | 156.1               | 37%        |
| Marshall Islands                       | (4.5-9.4)       | (8.2-16)         | (29%-39%) | (138.1-219.8)       | (251.9-386.3)          | (22%-32%) | (0.9-2.2)                | (2.6-5.8)        | (4%-73%)   | (54.5-111.4)      | (110.5-221.4)       | (8%-69%)   |
|                                        | 15              | 14.7             | 45%       | 372.1               | 370.1                  | 36%       | 4                        | 5.5              | 51%        | 194.5             | 212.5               | 47%        |
| Micronesia<br>(Federated States<br>of) | (10.2-20.8)     | (10.3-20.2)      | (39%-51%) | (297.7-466.2)       | (301.3-453.5)          | (30%-41%) | (2.4-6)                  | (3.5-7.8)        | (3%-113%)  | (128.5-275.8)     | (143-298.4)         | (1%-99%)   |

|                  |                          |                    |                  |                              |                        |                  |                      |                  |                     |                           |                       |                     |
|------------------|--------------------------|--------------------|------------------|------------------------------|------------------------|------------------|----------------------|------------------|---------------------|---------------------------|-----------------------|---------------------|
| Papua New Guinea | 785.5<br>(495.9-1194.9)  | 7.1<br>(4.9-10.2)  | 29%<br>(23%-35%) | 21467.5<br>(16271.3-27920.5) | 231.5<br>(182.7-288.5) | 22%<br>(17%-28%) | 78.5<br>(52.1-114.2) | 1.2<br>(0.8-1.7) | 15%<br>(-11%-47%)   | 5769.8<br>(4174.4-7673)   | 64.9<br>(48.2-86)     | 19%<br>(-2%-44%)    |
| Samoa            | 23.8<br>(16.7-33)        | 11.9<br>(8.7-16)   | 33%<br>(28%-39%) | 639.3<br>(512.7-790.8)       | 324.1<br>(267.5-394.4) | 25%<br>(20%-30%) | 4.7<br>(3.2-6.8)     | 3.1<br>(2.2-4.5) | 18%<br>(-14%-61%)   | 226.5<br>(161.6-311.8)    | 127.2<br>(91.4-175)   | 22%<br>(-8%-63%)    |
| Solomon Islands  | 79.3<br>(50.9-118.8)     | 11.3<br>(7.7-16.3) | 4%<br>(0%-8%)    | 1863.1<br>(1470.6-2403.3)    | 309.9<br>(253-388.9)   | 12%<br>(8%-15%)  | 9.2<br>(6.3-13.3)    | 2.1<br>(1.5-2.9) | -42%<br>(-58%--20%) | 641<br>(463.7-860.9)      | 116<br>(85.7-153.2)   | -31%<br>(-48%--10%) |
| Tonga            | 11.4<br>(7.7-16)         | 11.3<br>(8-15.5)   | 39%<br>(33%-45%) | 304.3<br>(241.9-381.5)       | 318.8<br>(259.5-392.4) | 28%<br>(23%-33%) | 2.3<br>(1.6-3.4)     | 2.8<br>(1.9-4.2) | 47%<br>(12%-94%)    | 101.1<br>(73.9-139.6)     | 114.2<br>(83.9-157.6) | 45%<br>(17%-82%)    |
| Vanuatu          | 28.3<br>(18.1-41.3)      | 9.6<br>(6.5-13.4)  | 39%<br>(33%-45%) | 754.5<br>(590.4-985.3)       | 280.1<br>(225.3-353.1) | 27%<br>(22%-33%) | 6<br>(3.9-8.8)       | 3.2<br>(2.1-4.7) | 66%<br>(17%-136%)   | 304.5<br>(210.9-418.2)    | 128<br>(90.8-178.5)   | 63%<br>(19%-119%)   |
| Armenia          | 272.1<br>(195.5-369.2)   | 9.4<br>(6.3-13.3)  | 57%<br>(45%-71%) | 8108.7<br>(6454.6-10098.2)   | 249.4<br>(193.5-315.9) | 31%<br>(24%-38%) | 51.6<br>(35.4-73.4)  | 1.3<br>(0.9-1.8) | 268%<br>(207%-337%) | 1655.3<br>(1275.8-2093.7) | 46.2<br>(35.5-57.2)   | 160%<br>(119%-218%) |
| Azerbaijan       | 1153.7<br>(814.2-1632.7) | 11.6<br>(7.9-16.8) | 53%<br>(44%-64%) | 32609.7<br>(26053.8-41571.7) | 295.5<br>(233.8-381.2) | 35%<br>(28%-42%) | 191.8<br>(139-257.3) | 2.2<br>(1.6-3)   | 56%<br>(23%-91%)    | 8899.4<br>(6845-11391.8)  | 85.7<br>(67-108.5)    | 24%<br>(5%-48%)     |
| Georgia          | 344.7<br>(252.3-459.2)   | 10<br>(7-13.9)     | 49%<br>(39%-61%) | 9999.2<br>(8254.8-           | 258.7<br>(206.5-332.1) | 28%<br>(22%-35%) | 85.7<br>(60.3-117.3) | 1.5<br>(1.1-2.1) | 77%<br>(43%-114%)   | 2793.1<br>(2129.5-        | 62<br>(47.7-78.6)     | 54%<br>(32%-81%)    |

|              |                               |                    |                  |                                    |                        |                  |                       |                  |                     |                                  |                       |                     |
|--------------|-------------------------------|--------------------|------------------|------------------------------------|------------------------|------------------|-----------------------|------------------|---------------------|----------------------------------|-----------------------|---------------------|
|              |                               |                    |                  | 12386.6)                           |                        |                  |                       |                  |                     | 3559.3)                          |                       |                     |
| Kazakhstan   | 1924.4<br>(1305.5-<br>2715.1) | 10.4<br>(7-14.9)   | 36%<br>(27%-45%) | 50290.6<br>(39746.8-<br>62823.7)   | 264.8<br>(208.5-331.9) | 21%<br>(16%-27%) | 254<br>(184.8-336.7)  | 1.5<br>(1.1-2)   | 34%<br>(9%-62%)     | 11058.1<br>(8531.3-<br>13925.4)  | 59.5<br>(46-74.2)     | 4%<br>(-13%-20%)    |
| Kyrgyzstan   | 765.6<br>(505.6-1114.2)       | 11.3<br>(7.6-16.2) | 16%<br>(8%-24%)  | 18132<br>(13972.4-<br>23289.9)     | 276.6<br>(217-351.5)   | 11%<br>(5%-16%)  | 82.8<br>(60.3-111.2)  | 1.5<br>(1.1-2)   | -30%<br>(-41%--16%) | 4567<br>(3451.3-<br>5897.9)      | 72.7<br>(55.4-93.4)   | -33%<br>(-44%--22%) |
| Mongolia     | 409.3<br>(273.7-577.6)        | 11.8<br>(7.9-16.6) | 20%<br>(12%-28%) | 9853.5<br>(7534.7-<br>12653)       | 281.8<br>(217.1-360.7) | 15%<br>(10%-21%) | 64.1<br>(43.8-90.1)   | 2.5<br>(1.8-3.5) | -51%<br>(-62%--36%) | 3137<br>(2262.8-<br>4251.7)      | 95.8<br>(69.8-127.2)  | -48%<br>(-59%--33%) |
| Tajikistan   | 850.5<br>(531.9-1277.5)       | 8.5<br>(5.6-12.3)  | 49%<br>(40%-60%) | 21585.6<br>(16381.5-<br>28170.3)   | 231.7<br>(179.9-292.9) | 28%<br>(21%-35%) | 66.5<br>(48-90.8)     | 1.3<br>(0.9-1.7) | 157%<br>(101%-220%) | 4013.2<br>(3023.1-<br>5241.1)    | 49.3<br>(37.7-63)     | 78%<br>(49%-112%)   |
| Turkmenistan | 695.1<br>(455.1-997.7)        | 13.3<br>(8.8-19.1) | 52%<br>(42%-63%) | 16777<br>(13219.3-<br>21583.2)     | 323.8<br>(257.4-414.1) | 37%<br>(29%-46%) | 112.5<br>(80.9-155.7) | 2.5<br>(1.8-3.5) | 24%<br>(-1%-54%)    | 5741.9<br>(4256.3-<br>7481.6)    | 115.1<br>(86.3-149.6) | 21%<br>(0%-47%)     |
| Uzbekistan   | 4665.7<br>(3148.1-<br>6527.2) | 13.4<br>(9.2-18.4) | 35%<br>(30%-40%) | 109416.3<br>(84935.9-<br>138371.7) | 317.7<br>(249.8-395.6) | 27%<br>(22%-32%) | 647<br>(464-860.8)    | 2.7<br>(2-3.6)   | 24%<br>(-10%-56%)   | 35831.5<br>(27041.2-<br>46047.4) | 113<br>(86.3-142.6)   | 16%<br>(-9%-40%)    |
| Albania      | 219.7<br>(167.9-279.6)        | 8<br>(5.7-10.7)    | 37%<br>(30%-46%) | 5852.6<br>(4814.9-<br>6890.5)      | 199.2<br>(159.7-244.2) | 22%<br>(16%-28%) | 44.4<br>(28.7-65.3)   | 1.2<br>(0.8-1.7) | -31%<br>(-49%--9%)  | 1633.1<br>(1210.6-<br>2055.6)    | 52<br>(38.7-68.4)     | -24%<br>(-41%--5%)  |

|                        |                        |                   |                  |                              |                        |                  |                        |                  |                     |                            |                      |                     |
|------------------------|------------------------|-------------------|------------------|------------------------------|------------------------|------------------|------------------------|------------------|---------------------|----------------------------|----------------------|---------------------|
|                        |                        |                   |                  | 6944.3)                      |                        |                  |                        |                  |                     | 2183.7)                    |                      |                     |
| Bosnia and Herzegovina | 259.7<br>(208.4-316.5) | 6.9<br>(5.3-9)    | 44%<br>(36%-54%) | 7059.9<br>(5921.9-8333.2)    | 178.9<br>(144.5-220)   | 23%<br>(18%-29%) | 84.9<br>(54-124.1)     | 1.5<br>(1-2.2)   | 8%<br>(-16%-36%)    | 2455.5<br>(1804.6-3314.4)  | 51.1<br>(38.8-67.2)  | 0%<br>(-18%-20%)    |
| Bulgaria               | 677.9<br>(532.7-836.1) | 9.4<br>(6.8-12.4) | 58%<br>(48%-70%) | 17405<br>(14763.3-20230.3)   | 218.2<br>(175.7-266.8) | 34%<br>(26%-43%) | 279.8<br>(186.8-395.9) | 2.3<br>(1.6-3.1) | 103%<br>(61%-153%)  | 8467.6<br>(6084.8-11343.5) | 87.8<br>(64.4-114.6) | 79%<br>(47%-119%)   |
| Croatia                | 351.5<br>(284.2-424.8) | 7<br>(5.3-9)      | 34%<br>(26%-44%) | 9222<br>(7860.2-10851.7)     | 178.5<br>(146-220.4)   | 17%<br>(12%-22%) | 116.2<br>(73.7-172.6)  | 1.3<br>(0.8-1.8) | 18%<br>(-9%-51%)    | 2692.4<br>(1991.5-3606.6)  | 38.4<br>(29.6-49.6)  | 1%<br>(-16%-21%)    |
| Czechia                | 782.4<br>(623.5-981.3) | 6.5<br>(4.7-8.6)  | 28%<br>(21%-36%) | 22059.3<br>(18794.9-25899.3) | 174.4<br>(142.6-214.5) | 15%<br>(10%-20%) | 147.4<br>(98.3-214.5)  | 0.7<br>(0.5-1)   | -38%<br>(-52%--23%) | 4321.6<br>(3282.7-5613.1)  | 27.5<br>(21.2-35.3)  | -36%<br>(-46%--25%) |
| Hungary                | 724.7<br>(577.9-886.8) | 6.7<br>(4.9-8.8)  | 47%<br>(38%-58%) | 19901.4<br>(16583.9-23755.3) | 174.3<br>(137.4-214.4) | 23%<br>(17%-29%) | 151.1<br>(101.6-219.4) | 0.8<br>(0.6-1.1) | 22%<br>(-2%-52%)    | 4213.3<br>(3233.4-5468.6)  | 30.1<br>(23.5-38.1)  | 1%<br>(-13%-17%)    |
| North Macedonia        | 203.6<br>(162.1-252.3) | 8.5<br>(6.4-11)   | 47%<br>(39%-57%) | 5095.6<br>(4265.8-6081.3)    | 202.3<br>(163.2-251.3) | 25%<br>(19%-32%) | 50<br>(32.6-73.6)      | 1.7<br>(1.2-2.4) | 1%<br>(-23%-30%)    | 1657.2<br>(1222.7-2217.4)  | 58.4<br>(44.1-76)    | -4%<br>(-22%-19%)   |
| Montenegro             | 60.6<br>(47.7-75.7)    | 8.9<br>(6.7-11.7) | 22%<br>(16%-30%) | 1471.6<br>(1244.9-           | 207.5<br>(168.7-254.2) | 11%<br>(7%-15%)  | 20.1<br>(14-28.1)      | 2.2<br>(1.6-3)   | 3%<br>(-18%-27%)    | 588.9<br>(447.8-774.1)     | 72<br>(56.1-93.3)    | -5%<br>(-21%-13%)   |

|          |                         |                   |                  |                              |                        |                  |                        |                  |                     |                            |                     |                     |
|----------|-------------------------|-------------------|------------------|------------------------------|------------------------|------------------|------------------------|------------------|---------------------|----------------------------|---------------------|---------------------|
|          |                         |                   |                  | 1746.4)                      |                        |                  |                        |                  |                     |                            |                     |                     |
| Poland   | 2592.2<br>(2290-2938.5) | 6.3<br>(5.5-7.3)  | -2%<br>(-4%-1%)  | 77088.5<br>(70143.3-84392.6) | 175.5<br>(157.8-193.8) | -2%<br>(-5%-0%)  | 659.5<br>(457.4-898.8) | 1<br>(0.7-1.3)   | -48%<br>(-57%--38%) | 18549.7<br>(14760.9-23250) | 34.5<br>(27.9-42.3) | -53%<br>(-60%--46%) |
| Romania  | 1431.7<br>(1130-1810.2) | 6.8<br>(5-9.3)    | 32%<br>(25%-41%) | 40636.4<br>(34740.9-47850.1) | 179.2<br>(145.9-220)   | 16%<br>(11%-22%) | 541<br>(368.8-748.7)   | 1.5<br>(1.1-2.1) | -54%<br>(-64%--41%) | 15835.7<br>(11980.1-20133) | 55.5<br>(43.5-68.8) | -52%<br>(-61%--43%) |
| Serbia   | 679.4<br>(553.2-830.3)  | 6.5<br>(5-8.4)    | 35%<br>(26%-45%) | 17684.9<br>(14938.6-20932.5) | 166.2<br>(135.5-205.6) | 14%<br>(9%-20%)  | 308.8<br>(198-460.2)   | 2<br>(1.3-2.9)   | 0%<br>(-24%-27%)    | 7472<br>(5362.8-10324.6)   | 54.8<br>(41-73)     | -13%<br>(-30%-5%)   |
| Slovakia | 438.1<br>(344-551.6)    | 7.2<br>(5.3-9.6)  | 24%<br>(17%-31%) | 11489.9<br>(9572.6-13761.4)  | 181<br>(145.2-226.4)   | 12%<br>(7%-17%)  | 75.7<br>(50.1-111.9)   | 0.9<br>(0.6-1.3) | -39%<br>(-53%--22%) | 2492.9<br>(1860.4-3277.8)  | 33.5<br>(25.5-43.2) | -36%<br>(-47%--23%) |
| Slovenia | 144.2<br>(116.3-176.4)  | 6.1<br>(4.6-8.1)  | 38%<br>(30%-47%) | 4178.3<br>(3565-4941.8)      | 169.1<br>(137.1-210.7) | 18%<br>(13%-23%) | 32<br>(19.5-49)        | 0.7<br>(0.4-1)   | -43%<br>(-62%--18%) | 776.5<br>(567.5-1023.4)    | 23.3<br>(17.4-30.3) | -33%<br>(-48%--15%) |
| Belarus  | 693.4<br>(512.3-916.2)  | 7.8<br>(5.2-11)   | 41%<br>(31%-52%) | 24351.2<br>(19745.4-30014)   | 234.9<br>(182-303.6)   | 20%<br>(15%-27%) | 135<br>(95.2-185)      | 0.9<br>(0.6-1.2) | 50%<br>(18%-90%)    | 4237<br>(3249.1-5406.2)    | 34.4<br>(26.9-43.2) | 63%<br>(37%-99%)    |
| Estonia  | 118.1<br>(89-152.3)     | 9.2<br>(6.4-12.9) | 49%<br>(40%-60%) | 3803.8<br>(3137.4-4596.6)    | 264.2<br>(208.1-331.6) | 25%<br>(19%-31%) | 62.8<br>(39.1-92.1)    | 2.1<br>(1.4-3)   | 281%<br>(197%-374%) | 1194.4<br>(864.8-1612.2)   | 54.6<br>(41.1-70.3) | 137%<br>(92%-196%)  |

|                        |                                  |                     |                  |                                     |                        |                  |                               |                  |                     |                                  |                      |                     |
|------------------------|----------------------------------|---------------------|------------------|-------------------------------------|------------------------|------------------|-------------------------------|------------------|---------------------|----------------------------------|----------------------|---------------------|
| Latvia                 | 147.3<br>(111.7-188.1)           | 8.2<br>(5.7-11.2)   | 48%<br>(39%-59%) | 5205.2<br>(4315.8-<br>6290.6)       | 250<br>(197.2-317.1)   | 25%<br>(19%-30%) | 66.2<br>(45.9-91.3)           | 1.7<br>(1.2-2.2) | 172%<br>(126%-232%) | 1552.6<br>(1196.1-<br>1982.6)    | 53.7<br>(42.8-66.2)  | 134%<br>(98%-181%)  |
| Lithuania              | 202.1<br>(154.5-262.2)           | 7.9<br>(5.4-10.9)   | 28%<br>(21%-37%) | 7348.3<br>(6106.9-<br>8944.4)       | 244<br>(192-309.8)     | 16%<br>(12%-22%) | 69<br>(48.4-92.7)             | 1.2<br>(0.9-1.6) | 71%<br>(39%-110%)   | 1739<br>(1355.4-<br>2181.1)      | 42.4<br>(33.7-52.8)  | 62%<br>(37%-92%)    |
| Republic of<br>Moldova | 230.3<br>(169.1-306.4)           | 6.6<br>(4.6-9.3)    | 55%<br>(45%-65%) | 8930<br>(7197.3-<br>11097.6)        | 213.5<br>(166.9-271.9) | 25%<br>(18%-32%) | 68.1<br>(52.3-85.7)           | 1.3<br>(1-1.6)   | 68%<br>(41%-100%)   | 2323.6<br>(1885.7-<br>2777.4)    | 50.3<br>(41.2-59.7)  | 81%<br>(58%-107%)   |
| Russian<br>Federation  | 16240.5<br>(14433.4-<br>18167.7) | 11.7<br>(10.4-13.2) | 28%<br>(23%-33%) | 485827.9<br>(445238.5-<br>528555.2) | 311.7<br>(282-343.6)   | 12%<br>(8%-16%)  | 3668.9<br>(2882-4525.2)       | 1.7<br>(1.3-2)   | -14%<br>(-27%--1%)  | 117030.7<br>(96976-<br>138458.7) | 62.2<br>(52.1-73.5)  | -27%<br>(-34%--18%) |
| Ukraine                | 2856<br>(2141.4-<br>3713.8)      | 7.2<br>(5-10.1)     | 47%<br>(37%-58%) | 111373.4<br>(90211.6-<br>138551.4)  | 229.8<br>(178.7-292.3) | 23%<br>(17%-30%) | 760.2<br>(588.8-954.8)        | 1.2<br>(0.9-1.4) | 93%<br>(60%-134%)   | 25708.2<br>(20723.4-<br>31019.9) | 46.9<br>(37.8-56.7)  | 121%<br>(87%-164%)  |
| Brunei<br>Darussalam   | 35.5<br>(26.3-46.1)              | 8.6<br>(6.4-11.1)   | 4%<br>(0%-9%)    | 962<br>(757.8-1200.6)               | 209.9<br>(168.4-258.6) | 3%<br>(-1%-7%)   | 8.2<br>(6.1-10.9)             | 2.7<br>(2-3.5)   | -8%<br>(-23%-12%)   | 353<br>(271.7-453.1)             | 85.9<br>(67.3-108.6) | -14%<br>(-27%-4%)   |
| Japan                  | 11669.5<br>(10630.1-<br>12853.8) | 6.9<br>(6.2-7.7)    | 3%<br>(1%-6%)    | 299088.9<br>(276815-<br>323489.2)   | 178.8<br>(163.3-196.9) | 0%<br>(-2%-1%)   | 2243.9<br>(1467.8-<br>3325.7) | 0.6<br>(0.4-0.8) | -36%<br>(-42%--31%) | 54241.5<br>(42148.3-<br>68770.9) | 23.6<br>(18.9-28.9)  | -25%<br>(-31%--20%) |

|                   |                           |                  |                   |                               |                        |                   |                        |                  |                     |                             |                     |                     |
|-------------------|---------------------------|------------------|-------------------|-------------------------------|------------------------|-------------------|------------------------|------------------|---------------------|-----------------------------|---------------------|---------------------|
| Republic of Korea | 3180.3<br>(2616.7-3826.7) | 4.9<br>(3.9-6.3) | -8%<br>(-14%--1%) | 86970.4<br>(73456.2-103110.4) | 132.6<br>(107.5-164.7) | -8%<br>(-13%--3%) | 367.8<br>(274.4-498.4) | 0.4<br>(0.3-0.6) | -69%<br>(-76%--60%) | 11190.6<br>(9172.1-13597.2) | 15.2<br>(12.4-18.4) | -74%<br>(-78%--70%) |
| Singapore         | 441.1<br>(357.1-536.9)    | 6.7<br>(5.2-8.5) | -1%<br>(-6%-7%)   | 13770<br>(11525.4-16554.1)    | 199<br>(162.4-244.5)   | -1%<br>(-5%-3%)   | 69.6<br>(51.6-92.6)    | 1<br>(0.7-1.3)   | -43%<br>(-50%--35%) | 2568.5<br>(2053.7-3206.5)   | 36.1<br>(29.4-44.3) | -44%<br>(-50%--37%) |
| Australia         | 1478.6<br>(1209.5-1791.6) | 5<br>(3.9-6.5)   | 19%<br>(12%-27%)  | 42090.2<br>(36248.2-49758.7)  | 145.4<br>(120-177.3)   | 16%<br>(10%-23%)  | 1337.3<br>(919.4-1812) | 2.9<br>(2-3.8)   | 6%<br>(-21%-34%)    | 22040.1<br>(17460.9-27238)  | 55.9<br>(45.3-67.4) | 7%<br>(-10%-26%)    |
| New Zealand       | 307.8<br>(255.9-362.9)    | 5.8<br>(4.7-7.2) | 16%<br>(10%-22%)  | 7737.4<br>(6684.6-8800.6)     | 150<br>(126.1-175.1)   | 13%<br>(9%-18%)   | 245.7<br>(186.8-310.2) | 3<br>(2.3-3.8)   | 30%<br>(14%-49%)    | 4643.2<br>(3852-5497.8)     | 66.9<br>(56.8-78.1) | 25%<br>(12%-40%)    |
| Andorra           | 3.9<br>(3.3-4.7)          | 4<br>(3.1-5.1)   | 3%<br>(-3%-9%)    | 113.3<br>(96.3-133.7)         | 111.1<br>(90.1-136)    | 1%<br>(-4%-5%)    | 1.7<br>(1.1-2.6)       | 1.1<br>(0.7-1.7) | -15%<br>(-40%-15%)  | 34.3<br>(25.1-45.5)         | 26.9<br>(20-35)     | -15%<br>(-36%-9%)   |
| Austria           | 527.7<br>(433.7-643.8)    | 4.6<br>(3.5-5.9) | 18%<br>(11%-27%)  | 14095.6<br>(11980.2-16349.2)  | 127.3<br>(103.5-154.9) | 14%<br>(9%-19%)   | 388.6<br>(248.2-582.5) | 1.8<br>(1.2-2.6) | 109%<br>(78%-146%)  | 6053<br>(4579.6-7940.1)     | 37.2<br>(29.6-46.8) | 42%<br>(27%-60%)    |
| Belgium           | 618.6<br>(509.4-745.8)    | 4.4<br>(3.4-5.5) | 6%<br>(0%-13%)    | 16281.9<br>(13817.4-19027.4)  | 118.9<br>(97.7-144.5)  | 4%<br>(0%-9%)     | 259<br>(164.6-394.4)   | 0.9<br>(0.6-1.4) | -1%<br>(-14%-15%)   | 4652.1<br>(3579.7-6016.8)   | 23.7<br>(18.9-29.5) | -11%<br>(-20%--2%)  |



|         |                               |                  |                  |                                     |                        |                 |                               |                  |                     |                                  |                     |                     |
|---------|-------------------------------|------------------|------------------|-------------------------------------|------------------------|-----------------|-------------------------------|------------------|---------------------|----------------------------------|---------------------|---------------------|
| Cyprus  | 76.7<br>(62.6-92.7)           | 4.9<br>(3.9-6.1) | 8%<br>(3%-13%)   | 1901<br>(1592.5-<br>2256.3)         | 121.7<br>(100.5-148.3) | 4%<br>(0%-9%)   | 37.3<br>(23.6-55.8)           | 2.2<br>(1.4-3.2) | -39%<br>(-49%--25%) | 711.9<br>(531-946.9)             | 39.8<br>(30.3-52.3) | -36%<br>(-46%--24%) |
| Denmark | 326.9<br>(265.5-392.4)        | 4.5<br>(3.4-5.6) | 13%<br>(6%-21%)  | 8650.2<br>(7298.6-<br>10159.9)      | 124.2<br>(100.4-152.5) | 10%<br>(5%-15%) | 123.2<br>(81.3-175.3)         | 1<br>(0.7-1.4)   | 76%<br>(49%-104%)   | 2565.8<br>(1979.8-<br>3239.4)    | 27.4<br>(21.7-33.9) | 25%<br>(12%-40%)    |
| Finland | 233.8<br>(190-281.7)          | 3.3<br>(2.5-4.2) | 20%<br>(14%-27%) | 7166.8<br>(6157.6-<br>8334.9)       | 107.3<br>(88.5-132.4)  | 14%<br>(9%-20%) | 75.2<br>(48.1-112.3)          | 0.5<br>(0.4-0.8) | 40%<br>(17%-63%)    | 1525.4<br>(1191.2-1955)          | 16.6<br>(13.3-20.6) | 11%<br>(1%-22%)     |
| France  | 3348.1<br>(2708.3-<br>4076.8) | 4<br>(3.1-5.2)   | 12%<br>(5%-20%)  | 91118<br>(77900.7-<br>107181.1)     | 116.1<br>(94.6-142.1)  | 9%<br>(4%-14%)  | 1296.9<br>(782.6-1959.4)      | 0.7<br>(0.5-1.1) | -21%<br>(-30%--10%) | 22932.6<br>(17591.1-<br>29526.6) | 19.9<br>(16-24.6)   | -17%<br>(-24%--10%) |
| Germany | 5543.6<br>(4620.5-<br>6528.3) | 4.9<br>(3.8-6.3) | 8%<br>(2%-15%)   | 130540.5<br>(112508.8-<br>150614.4) | 122.5<br>(100.9-150.1) | 4%<br>(0%-8%)   | 4038.5<br>(2472.7-<br>6180.3) | 1.7<br>(1.1-2.6) | 74%<br>(40%-118%)   | 60876.2<br>(43088.7-<br>83007.8) | 34.6<br>(26.2-44.6) | 11%<br>(-3%-28%)    |
| Greece  | 650.7<br>(539.7-778.3)        | 4.7<br>(3.7-6.1) | -2%<br>(-6%-2%)  | 18234.1<br>(14945.4-<br>22132.3)    | 137.3<br>(108.1-177.2) | 0%<br>(-4%-5%)  | 506.9<br>(325.6-754.1)        | 1.8<br>(1.2-2.5) | -26%<br>(-34%--18%) | 8647.1<br>(6460.1-<br>11519.2)   | 41.8<br>(33.2-52.5) | -23%<br>(-29%--16%) |
| Iceland | 14<br>(11.3-17.3)             | 3.6<br>(2.8-4.6) | 2%<br>(-4%-9%)   | 427.6<br>(358.6-510.9)              | 109.3<br>(88.9-133.7)  | 8%<br>(3%-13%)  | 4<br>(2.6-5.8)                | 0.6<br>(0.4-0.9) | 13%<br>(-3%-30%)    | 87.4<br>(68-111.5)               | 18<br>(14.3-22.4)   | 2%<br>(-8%-13%)     |

|             |                               |                  |                  |                                  |                        |                  |                               |                  |                     |                                |                     |                     |
|-------------|-------------------------------|------------------|------------------|----------------------------------|------------------------|------------------|-------------------------------|------------------|---------------------|--------------------------------|---------------------|---------------------|
| Ireland     | 312.5<br>(256.9-382.3)        | 5.7<br>(4.5-7.3) | 8%<br>(-6%-23%)  | 7910.6<br>(6804.3-<br>9284.1)    | 145.1<br>(120.5-175.5) | 6%<br>(-4%-16%)  | 77.6<br>(50.3-113.5)          | 1<br>(0.7-1.4)   | -23%<br>(-34%--11%) | 1633.6<br>(1244.3-2106)        | 24.7<br>(19.3-31.2) | -25%<br>(-33%--15%) |
| Israel      | 551.6<br>(441.4-688.6)        | 5.5<br>(4.3-7)   | 10%<br>(4%-18%)  | 12715.1<br>(10584.9-<br>15213.1) | 132<br>(108.3-160.6)   | 6%<br>(1%-11%)   | 228.6<br>(154-324)            | 1.8<br>(1.3-2.6) | -6%<br>(-16%-4%)    | 4618.9<br>(3563.2-<br>5879.7)  | 42.3<br>(33-52.9)   | -8%<br>(-15%-0%)    |
| Italy       | 3068.3<br>(2748.5-<br>3409.6) | 3.8<br>(3.4-4.3) | -5%<br>(-7%--2%) | 89531<br>(81638.8-<br>97416.7)   | 117.9<br>(106.2-131.1) | -3%<br>(-5%--2%) | 1966.8<br>(1220.2-<br>2911.8) | 1.1<br>(0.7-1.6) | -20%<br>(-30%--10%) | 32464.1<br>(24411.5-<br>41892) | 27.3<br>(22.3-33.1) | -31%<br>(-36%--26%) |
| Luxembourg  | 32<br>(26.3-38.3)             | 4.4<br>(3.4-5.5) | 11%<br>(5%-18%)  | 869<br>(733.1-1032.2)            | 118.4<br>(97.2-145.7)  | 5%<br>(1%-10%)   | 12.7<br>(8.2-19)              | 1.1<br>(0.8-1.7) | -2%<br>(-16%-14%)   | 251.6<br>(191.3-328.4)         | 27.7<br>(21.7-35.2) | -9%<br>(-19%-3%)    |
| Malta       | 28<br>(23-34.1)               | 4.8<br>(3.7-6.2) | 12%<br>(6%-19%)  | 691.5<br>(588.3-808.9)           | 126.8<br>(102.7-157.8) | 6%<br>(2%-11%)   | 11.9<br>(7.8-17.2)            | 1.2<br>(0.8-1.8) | -21%<br>(-33%--7%)  | 245<br>(187.8-322.3)           | 33.2<br>(26.3-41.5) | -12%<br>(-21%-0%)   |
| Netherlands | 882.1<br>(729.3-1053.3)       | 3.9<br>(3-5)     | 12%<br>(5%-20%)  | 25850.3<br>(21749-<br>30302.9)   | 124.2<br>(101.2-154.5) | 9%<br>(5%-13%)   | 358.2<br>(236.4-523.5)        | 1<br>(0.7-1.4)   | 11%<br>(-2%-27%)    | 6497.9<br>(5000.4-<br>8408.7)  | 22.5<br>(17.9-28.1) | -2%<br>(-11%-8%)    |
| Norway      | 222.8<br>(200.1-249.4)        | 3.4<br>(3-3.9)   | 20%<br>(15%-26%) | 7298.7<br>(6677-7961.7)          | 115.4<br>(104.6-127.1) | 17%<br>(14%-20%) | 115.9<br>(74.5-165.5)         | 1.1<br>(0.7-1.5) | 30%<br>(14%-47%)    | 2076.2<br>(1616.4-<br>2610.3)  | 24.8<br>(20.2-30)   | 2%<br>(-5%-10%)     |
| Portugal    | 555.4                         | 3.8              | 2%               | 15749.5                          | 115.1                  | 4%               | 422.9                         | 1.5              | -8%                 | 7042.4                         | 34.4                | -27%                |

|                |                           |                  |                     |                               |                        |                   |                          |                  |                     |                              |                     |                     |
|----------------|---------------------------|------------------|---------------------|-------------------------------|------------------------|-------------------|--------------------------|------------------|---------------------|------------------------------|---------------------|---------------------|
|                | (456.1-667.2)             | (3-4.8)          | (-4%-9%)            | (13635.3-18160.3)             | (96.2-140.1)           | (-1%-9%)          | (267.9-638.5)            | (1-2.2)          | (-22%-6%)           | (5258.5-9413.6)              | (27.6-43)           | (-35%--18%)         |
| Spain          | 2124.1<br>(1742.5-2526.5) | 3.4<br>(2.7-4.2) | -16%<br>(-22%--10%) | 57064<br>(48669-66588.9)      | 97.7<br>(80.2-120.7)   | -7%<br>(-13%--2%) | 1420.3<br>(892.8-2168.7) | 1.2<br>(0.8-1.7) | -33%<br>(-42%--22%) | 20819.7<br>(15620.7-28030.8) | 23.2<br>(18.3-29.2) | -44%<br>(-49%--37%) |
| Sweden         | 391.2<br>(329.1-458.7)    | 2.9<br>(2.3-3.4) | -1%<br>(-8%-7%)     | 15069.4<br>(13057.3-17820.5)  | 120.2<br>(100.6-147.7) | 1%<br>(-4%-6%)    | 265.6<br>(171.8-382.2)   | 1.1<br>(0.7-1.5) | 69%<br>(47%-91%)    | 4426.2<br>(3395.4-5740.9)    | 23.9<br>(19.2-29.6) | 18%<br>(8%-30%)     |
| Switzerland    | 470.4<br>(389.9-568.3)    | 4.3<br>(3.4-5.7) | 5%<br>(-1%-11%)     | 12629.7<br>(10781.4-14915.7)  | 120<br>(98-149.9)      | 1%<br>(-3%-5%)    | 178.9<br>(107.9-281.7)   | 0.8<br>(0.5-1.2) | 55%<br>(28%-86%)    | 2928.9<br>(2168.2-3879.9)    | 19<br>(14.7-24.2)   | 8%<br>(-5%-23%)     |
| United Kingdom | 3463<br>(3149-3838.7)     | 4.5<br>(4-5.1)   | 10%<br>(7%-14%)     | 98993.9<br>(90555.1-107907.2) | 129.5<br>(117.6-143.1) | 8%<br>(5%-11%)    | 898.5<br>(597.8-1292.6)  | 0.7<br>(0.5-0.9) | -8%<br>(-16%-0%)    | 21644.2<br>(17374.7-26495.7) | 22.2<br>(18.3-26.8) | -10%<br>(-14%--6%)  |
| Argentina      | 2748.3<br>(2140.7-3499.7) | 6<br>(4.6-7.8)   | 13%<br>(7%-21%)     | 74895.6<br>(61582.8-91487)    | 157.9<br>(128.4-195.2) | 8%<br>(4%-13%)    | 1186<br>(854.3-1634.8)   | 2.2<br>(1.6-3)   | 9%<br>(-2%-22%)     | 32428.8<br>(25675.8-40515.7) | 64.1<br>(50.5-79.6) | -3%<br>(-11%-6%)    |
| Chile          | 1313.4<br>(1054.6-1644)   | 6.9<br>(5.3-9.2) | 38%<br>(29%-48%)    | 34278.5<br>(28292.6-41649.3)  | 172.7<br>(138.4-214.9) | 23%<br>(16%-29%)  | 376.5<br>(270.2-525.1)   | 1.6<br>(1.2-2.2) | 24%<br>(11%-39%)    | 10074.5<br>(7953.8-12647.8)  | 45.4<br>(36.1-56.9) | 7%<br>(-3%-17%)     |
| Uruguay        | 194.5                     | 5.4              | 18%                 | 5435.5                        | 146.9                  | 10%               | 55.5                     | 0.9              | -18%                | 1304.6                       | 29                  | -18%                |

|                          |                              |                    |                  |                                 |                        |                  |                             |                   |                   |                                 |                        |                   |
|--------------------------|------------------------------|--------------------|------------------|---------------------------------|------------------------|------------------|-----------------------------|-------------------|-------------------|---------------------------------|------------------------|-------------------|
|                          | (154.8-239.8)                | (4-6.9)            | (12%-25%)        | (4464.7-6590.6)                 | (117.4-182.9)          | (5%-16%)         | (40.4-76.4)                 | (0.7-1.3)         | (-35%-3%)         | (1076.2-1601.5)                 | (23.7-35.2)            | (-30%--3%)        |
| Canada                   | 2129<br>(1735.2-2597.7)      | 5<br>(3.7-6.5)     | 5%<br>(-4%-14%)  | 62410.1<br>(53344.5-75073.9)    | 148.8<br>(121.6-186.6) | 7%<br>(2%-13%)   | 846.7<br>(594.1-1184.5)     | 1.2<br>(0.9-1.6)  | 14%<br>(2%-28%)   | 18560.8<br>(14951.2-23427.1)    | 33.6<br>(27.5-41.1)    | 13%<br>(4%-22%)   |
| United States of America | 27630.7<br>(25129.2-30326.2) | 7.6<br>(6.9-8.4)   | -1%<br>(-5%-2%)  | 784893.9<br>(724144.2-853245.7) | 212.4<br>(193.6-234.5) | 1%<br>(-2%-4%)   | 10481.7<br>(7640.9-14143.4) | 1.9<br>(1.4-2.5)  | 21%<br>(1%-45%)   | 297024.1<br>(239749.8-370912.6) | 65.9<br>(53.8-80.4)    | 25%<br>(12%-38%)  |
| Antigua and Barbuda      | 11.6<br>(9-15.1)             | 13<br>(9.7-17.6)   | 48%<br>(41%-56%) | 376.1<br>(297.1-470.5)          | 404.7<br>(310.8-526.8) | 58%<br>(47%-68%) | 6.5<br>(4.7-8.9)            | 6.6<br>(4.9-8.9)  | 36%<br>(12%-63%)  | 219.4<br>(169.7-281.9)          | 215.5<br>(167.9-273.7) | 29%<br>(9%-54%)   |
| Bahamas                  | 45.4<br>(33.8-59.3)          | 12.3<br>(8.8-16.5) | 46%<br>(39%-53%) | 1198<br>(985.7-1438.4)          | 296.1<br>(240.6-359.6) | 37%<br>(30%-43%) | 22.8<br>(16.7-30.7)         | 5.7<br>(4.2-7.8)  | 21%<br>(-3%-53%)  | 893.7<br>(683.6-1164.7)         | 213.9<br>(164.6-275.3) | 23%<br>(0%-51%)   |
| Barbados                 | 34.7<br>(27.2-43.6)          | 11.5<br>(8.3-15.5) | 46%<br>(39%-53%) | 925.6<br>(774.1-1090.6)         | 280.7<br>(229.1-341.9) | 35%<br>(28%-41%) | 20.3<br>(14.4-27.7)         | 4.4<br>(3.2-6)    | 33%<br>(8%-60%)   | 629.4<br>(481.6-823.8)          | 158.6<br>(123.6-203.6) | 30%<br>(9%-55%)   |
| Belize                   | 51.9<br>(36.2-72.4)          | 13.2<br>(9.5-18.1) | 59%<br>(48%-70%) | 1268.9<br>(1002-1588.4)         | 313.7<br>(253.5-383)   | 46%<br>(37%-55%) | 23.8<br>(17.9-30.8)         | 7.7<br>(5.7-10.2) | 82%<br>(54%-117%) | 997.7<br>(791.6-1228.7)         | 276.9<br>(218.1-346.6) | 82%<br>(55%-114%) |
| Cuba                     | 1165.1<br>(897.5-1468)       | 10<br>(7.1-13.4)   | 52%<br>(44%-62%) | 30915.4<br>(26358.4-36560.6)    | 243.6<br>(198.8-300.7) | 34%<br>(27%-41%) | 486.5<br>(347-671.1)        | 2.8<br>(2-3.8)    | 66%<br>(31%-106%) | 15884.2<br>(12047.1-20690.4)    | 104<br>(80.8-131.9)    | 43%<br>(19%-73%)  |
| Dominica                 | 9.5                          | 14.6               | 39%              | 248.6                           | 346.7                  | 36%              | 7.4                         | 8.6               | 33%               | 239.4                           | 302.5                  | 35%               |

|                                  |                          |                     |                  |                              |                        |                  |                      |                   |                   |                              |                        |                   |
|----------------------------------|--------------------------|---------------------|------------------|------------------------------|------------------------|------------------|----------------------|-------------------|-------------------|------------------------------|------------------------|-------------------|
|                                  | (7.2-12.7)               | (10.5-20.3)         | (34%-45%)        | (203.2-305.4)                | (275.9-434.7)          | (30%-43%)        | (5.3-10.2)           | (6.3-11.8)        | (5%-67%)          | (180.1-316.4)                | (228.9-394.5)          | (8%-69%)          |
| Dominican Republic               | 1110.9<br>(779.1-1522.8) | 10.2<br>(7.3-13.9)  | 69%<br>(59%-79%) | 27270.6<br>(21384.9-33801.7) | 250.1<br>(197.7-307.3) | 46%<br>(38%-55%) | 478.1<br>(318.7-693) | 4.9<br>(3.3-7.1)  | 63%<br>(18%-122%) | 18887<br>(13313.2-26064.5)   | 181.1<br>(127.2-251.5) | 50%<br>(11%-101%) |
| Grenada                          | 15.2<br>(11.4-19.7)      | 14.8<br>(10.9-19.6) | 60%<br>(52%-70%) | 366.6<br>(302.2-439.4)       | 334.4<br>(271.6-407.3) | 48%<br>(40%-55%) | 9.5<br>(7.1-12.3)    | 8.6<br>(6.5-11.1) | 29%<br>(11%-48%)  | 331.8<br>(262.8-412.3)       | 291.5<br>(234.4-358.1) | 26%<br>(9%-45%)   |
| Guyana                           | 98.4<br>(71.1-135)       | 12.9<br>(9.3-17.7)  | 56%<br>(49%-64%) | 2340.2<br>(1844.4-2880.8)    | 300.5<br>(239-366.2)   | 43%<br>(36%-50%) | 60.4<br>(40.9-86.5)  | 9<br>(6.2-12.8)   | 61%<br>(20%-110%) | 2374.8<br>(1716.4-3252.3)    | 320.4<br>(231.7-438.5) | 60%<br>(22%-107%) |
| Haiti                            | 1142.6<br>(773.8-1621.2) | 9.3<br>(6.7-12.6)   | 33%<br>(29%-39%) | 27460.8<br>(21384.7-34454.2) | 234<br>(189.9-287)     | 28%<br>(23%-33%) | 544.3<br>(360.6-860) | 6.7<br>(4.2-10.9) | -5%<br>(-28%-24%) | 24450.5<br>(17157.1-35267.6) | 241.1<br>(168.9-359.5) | -8%<br>(-29%-17%) |
| Jamaica                          | 308.1<br>(229.7-411)     | 11.3<br>(8.3-15.4)  | 37%<br>(32%-43%) | 8086.1<br>(6538.3-9994.3)    | 274.6<br>(222.1-341.2) | 29%<br>(25%-34%) | 169<br>(119.4-233.3) | 5.6<br>(3.9-7.8)  | 40%<br>(8%-79%)   | 6002.7<br>(4429.6-7871)      | 201<br>(148.1-264.2)   | 51%<br>(21%-88%)  |
| Saint Lucia                      | 22.6<br>(17-29.2)        | 12.9<br>(9.4-17.4)  | 50%<br>(43%-57%) | 576.2<br>(474.8-694.6)       | 300.8<br>(243.4-369.2) | 38%<br>(31%-45%) | 13.3<br>(9.8-18)     | 6.3<br>(4.7-8.5)  | 11%<br>(-8%-35%)  | 465.5<br>(356.3-594.1)       | 224.3<br>(174.2-284)   | 16%<br>(-2%-38%)  |
| Saint Vincent and the Grenadines | 13.8<br>(10.3-17.8)      | 12.3<br>(8.9-16.4)  | 48%<br>(41%-55%) | 355<br>(291.3-423.7)         | 296.2<br>(238.4-359.3) | 37%<br>(30%-45%) | 8.6<br>(6.4-11.4)    | 6.6<br>(5-8.6)    | 42%<br>(20%-69%)  | 302.9<br>(234.4-379.8)       | 235.7<br>(184.1-293.3) | 42%<br>(22%-68%)  |

|                                     |                           |                    |                  |                               |                        |                  |                          |                   |                    |                              |                        |                    |
|-------------------------------------|---------------------------|--------------------|------------------|-------------------------------|------------------------|------------------|--------------------------|-------------------|--------------------|------------------------------|------------------------|--------------------|
| Suriname                            | 98.5<br>(67.4-139.3)      | 18<br>(11.8-26)    | 71%<br>(60%-85%) | 1847.5<br>(1492.5-2244.5)     | 310.7<br>(246.9-380.7) | 39%<br>(32%-47%) | 50.3<br>(36.7-69.1)      | 8.4<br>(6.2-11.4) | 51%<br>(21%-84%)   | 1788.3<br>(1358.7-2345.8)    | 292.4<br>(225.5-378.6) | 44%<br>(18%-77%)   |
| Trinidad and Tobago                 | 178.8<br>(136.4-227.6)    | 12.8<br>(9.2-17)   | 55%<br>(45%-64%) | 4515.8<br>(3750.4-5377.3)     | 299.7<br>(241-366.3)   | 41%<br>(34%-49%) | 119<br>(78.6-178)        | 6.6<br>(4.4-9.7)  | 61%<br>(17%-110%)  | 3964<br>(2760.1-5596.8)      | 231.9<br>(165.4-322.1) | 59%<br>(19%-102%)  |
| Bolivia<br>(Plurinational State of) | 1061.4<br>(749.5-1473.4)  | 8.7<br>(6.4-11.7)  | 37%<br>(31%-43%) | 24231.5<br>(18965.2-31249.4)  | 208.8<br>(167.2-262.6) | 31%<br>(25%-37%) | 800.5<br>(536-1172.1)    | 9.2<br>(6.1-13.2) | 28%<br>(-4%-66%)   | 24757.1<br>(17447.4-34937.2) | 248.6<br>(173.4-352.7) | 7%<br>(-18%-40%)   |
| Ecuador                             | 1959.2<br>(1430.2-2616)   | 11.5<br>(8.5-15.3) | 77%<br>(65%-90%) | 44780<br>(36041.5-55993.9)    | 256.3<br>(208.5-317.4) | 55%<br>(45%-65%) | 1206.8<br>(838.7-1677.4) | 8.2<br>(5.6-11.3) | 114%<br>(66%-169%) | 36901.6<br>(27400.8-49432.8) | 228.2<br>(169.1-307)   | 74%<br>(39%-123%)  |
| Peru                                | 2826.4<br>(2057.8-3792.8) | 8.5<br>(6.2-11.4)  | 63%<br>(54%-72%) | 81213.3<br>(63577.5-103937)   | 237.2<br>(186.5-303.6) | 40%<br>(31%-49%) | 1367.6<br>(914.8-1975.6) | 4.2<br>(2.8-6.1)  | -8%<br>(-33%-25%)  | 43199.1<br>(31299.2-59382)   | 129.3<br>(93.6-177.3)  | -17%<br>(-37%-10%) |
| Colombia                            | 5413.7<br>(3991.6-7127.5) | 11.4<br>(8.3-15.3) | 32%<br>(25%-40%) | 140488<br>(113316.6-171526.6) | 283.2<br>(226-346.4)   | 25%<br>(19%-31%) | 1587.6<br>(1070.6-2251)  | 3<br>(2-4.3)      | -22%<br>(-39%-0%)  | 52926.1<br>(39408.2-70142.7) | 103.5<br>(77.3-136.8)  | -24%<br>(-38%--6%) |
| Costa Rica                          | 794.8<br>(613-1015.2)     | 16.7<br>(12.6-22)  | 16%<br>(10%-23%) | 18410.5<br>(15368.9-22149.3)  | 369<br>(304.5-449)     | 17%<br>(12%-22%) | 240.1<br>(165-341.4)     | 4.7<br>(3.2-6.7)  | 79%<br>(38%-129%)  | 8133.2<br>(6006.7-10894)     | 158<br>(118.2-211.6)   | 61%<br>(30%-99%)   |

|                                          |                              |                     |                   |                                 |                        |                  |                              |                     |                     |                                 |                        |                     |
|------------------------------------------|------------------------------|---------------------|-------------------|---------------------------------|------------------------|------------------|------------------------------|---------------------|---------------------|---------------------------------|------------------------|---------------------|
| El Salvador                              | 1151<br>(827.2-1576.1)       | 18.8<br>(13.7-25.7) | 86%<br>(70%-101%) | 24655.6<br>(19602.5-30921.4)    | 395.7<br>(317.6-492.5) | 64%<br>(52%-77%) | 783.1<br>(531-1131.4)        | 13.1<br>(8.7-19.1)  | 218%<br>(132%-322%) | 26715.5<br>(18728.4-36914.1)    | 444.9<br>(309.1-616.1) | 178%<br>(107%-261%) |
| Guatemala                                | 2568.5<br>(1784.9-3623.5)    | 15.4<br>(11.2-20.7) | 58%<br>(50%-67%)  | 58712.4<br>(44935.3-74636.2)    | 350.6<br>(280.4-429.1) | 49%<br>(41%-57%) | 1179.5<br>(847.8-1620.4)     | 9.8<br>(7-13.6)     | 65%<br>(27%-114%)   | 46378.4<br>(35006.1-60852.6)    | 324.9<br>(239.8-438.7) | 52%<br>(20%-94%)    |
| Honduras                                 | 1178<br>(818.7-1610.9)       | 12.8<br>(9.4-16.9)  | 38%<br>(31%-46%)  | 27264.5<br>(21402.9-34626)      | 299<br>(243.1-367.8)   | 29%<br>(23%-35%) | 601.5<br>(406.9-863.1)       | 9.7<br>(6.6-13.9)   | 92%<br>(50%-148%)   | 20534.9<br>(14553.5-28572.9)    | 285.1<br>(199.3-396.9) | 53%<br>(21%-97%)    |
| Mexico                                   | 23891.1<br>(21645.3-26381.1) | 19.2<br>(17.4-21.2) | 69%<br>(60%-79%)  | 558441.7<br>(509644.5-610909.5) | 436.1<br>(398.8-476.5) | 52%<br>(46%-59%) | 15277.8<br>(11619.6-19856.9) | 12.9<br>(9.8-16.7)  | 123%<br>(90%-161%)  | 506454.1<br>(403555.4-629031.3) | 406<br>(323.6-506.8)   | 114%<br>(85%-146%)  |
| Nicaragua                                | 1495.9<br>(1049.8-2031.2)    | 23.5<br>(16.9-31.2) | 67%<br>(58%-77%)  | 29689.7<br>(23002.1-37555.2)    | 467.2<br>(371.3-578.3) | 51%<br>(44%-60%) | 699.5<br>(500.5-948.5)       | 15.2<br>(10.8-20.6) | 105%<br>(66%-147%)  | 24394.8<br>(18000.7-32111.1)    | 458.9<br>(338.6-611.1) | 78%<br>(45%-117%)   |
| Panama                                   | 598.1<br>(442.1-786)         | 14.5<br>(10.7-19.1) | 45%<br>(34%-59%)  | 14179.9<br>(11436.9-17473.5)    | 338.1<br>(272.2-416.7) | 36%<br>(28%-46%) | 202.2<br>(136.7-286.8)       | 4.8<br>(3.3-6.9)    | 78%<br>(34%-128%)   | 7094.3<br>(5247.4-9430.4)       | 169.7<br>(125.2-226.2) | 64%<br>(29%-103%)   |
| Venezuela<br>(Bolivarian<br>Republic of) | 4035.5<br>(3044-5225.2)      | 14<br>(10.5-18.4)   | 43%<br>(33%-55%)  | 93902.4<br>(76826.8-112448.3)   | 319.6<br>(259.4-386.9) | 31%<br>(24%-38%) | 1907.7<br>(1239.4-2812.1)    | 6.6<br>(4.3-9.6)    | 123%<br>(63%-194%)  | 63600.2<br>(45024.5-88332.7)    | 212.5<br>(151-294.5)   | 93%<br>(48%-147%)   |

|                                  |                       |                     |           |                         |                        |           |                      |                  |             |                         |                        |             |
|----------------------------------|-----------------------|---------------------|-----------|-------------------------|------------------------|-----------|----------------------|------------------|-------------|-------------------------|------------------------|-------------|
| Brazil                           | 19242.3               | 9<br>(8-10.1)       | 20%       | 492919.7                | 216.2<br>(196.2-239.1) | 17%       | 8511.7               | 3.7<br>(2.9-4.6) | -11%        | 266926.1                | 112.9<br>(94.9-132.9)  | -18%        |
|                                  | (17306.4-<br>21598.7) |                     | (16%-24%) | (449375.6-<br>543228.6) |                        | (14%-20%) | (6727.4-<br>10588.6) |                  | (-17%--4%)  | (223152.3-<br>315748.4) |                        | (-23%--13%) |
| Paraguay                         | 709.7                 | 10.8<br>(8.1-14.2)  | 56%       | 16386.7                 | 239.5<br>(192.7-294.3) | 41%       | 340.9                | 6<br>(4-8.9)     | 120%        | 11317.6                 | 183.5<br>(129.6-257.2) | 98%         |
|                                  | (518.2-932.2)         |                     | (46%-66%) | (13003.2-<br>20363.4)   |                        | (33%-49%) | (231.7-496.3)        |                  | (63%-189%)  | (8117.1-<br>15643.2)    |                        | (50%-156%)  |
| Algeria                          | 5499.4                | 13.3<br>(9.9-17.2)  | 64%       | 117822.8                | 283.8<br>(230.3-352.4) | 48%       | 492.7                | 1.7<br>(1.1-2.5) | -26%        | 23577.8                 | 60.6<br>(46-78.6)      | -17%        |
|                                  | (4059.9-<br>7251.4)   |                     | (56%-72%) | (95073.9-<br>146382.7)  |                        | (40%-55%) | (338.3-719.7)        |                  | (-43%--1%)  | (17672-<br>31187.3)     |                        | (-34%-5%)   |
| Bahrain                          | 220.5                 | 14.8<br>(11.4-19)   | 80%       | 4509.7                  | 295.9<br>(240.3-366.3) | 56%       | 10.9                 | 1.7<br>(1.1-2.4) | -14%        | 685.9                   | 54.5<br>(41.7-70.5)    | -1%         |
|                                  | (167-281.3)           |                     | (70%-92%) | (3683-5496.9)           |                        | (47%-66%) | (7.6-15.7)           |                  | (-33%-9%)   | (506.5-914.9)           |                        | (-19%-19%)  |
| Egypt                            | 12612.5               | 13.8<br>(10.3-17.9) | 77%       | 266528.8                | 285.4<br>(231.2-351.4) | 57%       | 1368.7               | 2.4<br>(1.3-3.8) | 6%          | 61981.9                 | 78<br>(51.4-110.4)     | 5%          |
|                                  | (9092.3-<br>16769.9)  |                     | (69%-87%) | (208884.2-<br>338141.2) |                        | (49%-66%) | (738.4-2163.8)       |                  | (-22%-39%)  | (41903.8-<br>88013.5)   |                        | (-16%-30%)  |
| Iran<br>(Islamic<br>Republic of) | 11557.5               | 13.8<br>(12.4-15.4) | 31%       | 256138                  | 297.4<br>(269.7-327.7) | 23%       | 792.4                | 1.2<br>(0.9-1.5) | -24%        | 37710.6                 | 45.9<br>(37.4-55.1)    | -22%        |
|                                  | (10344-<br>12964.7)   |                     | (28%-34%) | (231693.5-<br>281719.5) |                        | (21%-26%) | (605.1-1032.2)       |                  | (-34%--16%) | (30275.3-<br>45877.8)   |                        | (-31%--13%) |
| Iraq                             | 5836.5                | 15.4<br>(11.5-20.2) | 55%       | 126502.9                | 319.9<br>(253.4-396.8) | 43%       | 518.3                | 2.3<br>(1.6-3.3) | -15%        | 27400.7                 | 82.5<br>(61.4-108.1)   | -13%        |
|                                  | (4049.4-<br>8055.1)   |                     | (48%-62%) | (95873.1-<br>162750.1)  |                        | (37%-50%) | (348.3-734.6)        |                  | (-36%-7%)   | (20035.1-<br>35639.6)   |                        | (-31%-8%)   |



|           |                           |                     |                    |                                |                        |                  |                        |                  |                     |                            |                     |                     |
|-----------|---------------------------|---------------------|--------------------|--------------------------------|------------------------|------------------|------------------------|------------------|---------------------|----------------------------|---------------------|---------------------|
| Jordan    | 1518.9<br>(1133.3-2008)   | 14.6<br>(11.3-18.6) | 68%<br>(58%-79%)   | 32542.6<br>(25768.4-41579.1)   | 298.6<br>(245.7-370.7) | 48%<br>(40%-56%) | 142.3<br>(102.5-193.6) | 2.4<br>(1.7-3.3) | -12%<br>(-32%-10%)  | 6919<br>(5225.7-8705.5)    | 76.9<br>(58.7-97.9) | -7%<br>(-24%-14%)   |
| Kuwait    | 556.6<br>(417.7-736.2)    | 13.4<br>(10.1-17.3) | 40%<br>(29%-51%)   | 12588.3<br>(9984.9-15736.6)    | 279.8<br>(222.6-348)   | 33%<br>(25%-42%) | 20.2<br>(14.8-27.6)    | 0.9<br>(0.6-1.2) | -45%<br>(-55%--33%) | 1551.3<br>(1115.1-2090.3)  | 38.2<br>(29.1-49.2) | -29%<br>(-41%--16%) |
| Lebanon   | 724.8<br>(562-955.5)      | 13.9<br>(10.8-18.3) | 72%<br>(63%-81%)   | 15463.5<br>(12496.7-19275.5)   | 295.9<br>(238.7-370)   | 51%<br>(43%-59%) | 65.9<br>(43.2-98.4)    | 1.3<br>(0.8-1.9) | -31%<br>(-51%--6%)  | 2687.7<br>(2016.1-3584.7)  | 51<br>(38.3-67.8)   | -16%<br>(-34%-5%)   |
| Libya     | 834.7<br>(627-1089)       | 13.3<br>(10-17.4)   | 56%<br>(49%-63%)   | 19160.9<br>(15276.3-24078.7)   | 278.5<br>(222.7-350.3) | 43%<br>(37%-49%) | 87.3<br>(54.3-131.2)   | 1.7<br>(1.1-2.7) | -2%<br>(-29%-34%)   | 4080.8<br>(2897.3-5643.1)  | 64<br>(45.3-87.6)   | 5%<br>(-17%-33%)    |
| Morocco   | 4607.2<br>(3488.4-6105.6) | 13.3<br>(10-17.7)   | 103%<br>(94%-113%) | 103816.9<br>(81351.9-131347.3) | 286.6<br>(226.1-362.3) | 76%<br>(64%-87%) | 448.2<br>(294.8-644.3) | 1.6<br>(1-2.3)   | 11%<br>(-16%-39%)   | 20797.2<br>(15181.5-27214) | 60.5<br>(44-78.2)   | 19%<br>(-4%-43%)    |
| Palestine | 638.6<br>(437.6-892.3)    | 14.4<br>(10.7-19)   | 43%<br>(35%-52%)   | 13738.2<br>(10306.3-18217.4)   | 301.9<br>(242.6-379.6) | 32%<br>(26%-38%) | 43.9<br>(32.5-58)      | 1.8<br>(1.3-2.5) | -33%<br>(-49%--13%) | 2535.3<br>(1972.7-3258.9)  | 67.9<br>(53.6-85.7) | -25%<br>(-39%--8%)  |
| Oman      | 484.1<br>(349.6-668)      | 12.6<br>(9.7-16.3)  | 95%<br>(83%-108%)  | 11706.6<br>(8991.5-14972.4)    | 264<br>(212.8-323.4)   | 64%<br>(53%-76%) | 12.9<br>(9.3-17.3)     | 1<br>(0.7-1.4)   | 8%<br>(-23%-50%)    | 1342.8<br>(951.2-1845.6)   | 38.4<br>(29.5-49.4) | 22%<br>(-3%-49%)    |

|                      |                            |                     |                   |                                 |                        |                  |                        |                  |                     |                             |                      |                     |
|----------------------|----------------------------|---------------------|-------------------|---------------------------------|------------------------|------------------|------------------------|------------------|---------------------|-----------------------------|----------------------|---------------------|
| Qatar                | 374.7<br>(276.9-496.6)     | 16.1<br>(12.2-20.4) | 79%<br>(69%-90%)  | 8904.8<br>(6873.9-11351)        | 314.5<br>(253.7-385.5) | 56%<br>(46%-67%) | 9.1<br>(6.2-12.9)      | 2.1<br>(1.3-3.3) | -8%<br>(-42%-30%)   | 1026.9<br>(708.7-1441.2)    | 56.6<br>(41.8-74.2)  | -7%<br>(-30%-19%)   |
| Saudi Arabia         | 6268.4<br>(4681.6-8114.8)  | 18.8<br>(14.5-23.9) | 91%<br>(80%-103%) | 128292<br>(100378.9-157329.9)   | 358.3<br>(290.2-432.2) | 70%<br>(59%-81%) | 535.5<br>(368.4-773.9) | 3<br>(2.1-4.3)   | 4%<br>(-27%-45%)    | 29303<br>(21062.1-39484.3)  | 98.1<br>(74.7-129.3) | 9%<br>(-18%-44%)    |
| Syrian Arab Republic | 1804.3<br>(1371.3-2348.1)  | 13<br>(9.8-17.1)    | 33%<br>(24%-45%)  | 39922.7<br>(31749.3-50493.2)    | 275.7<br>(220.5-344.9) | 21%<br>(16%-27%) | 183.2<br>(123.7-263.7) | 1.7<br>(1.1-2.4) | -33%<br>(-53%--9%)  | 8795.2<br>(6577.9-11456.7)  | 64<br>(47.8-82.6)    | -34%<br>(-50%--15%) |
| Tunisia              | 1464.9<br>(1126.7-1833.9)  | 12.4<br>(9.2-15.8)  | 71%<br>(63%-81%)  | 32074.5<br>(26337.6-38873.7)    | 265.1<br>(214-327.8)   | 50%<br>(42%-58%) | 174.4<br>(109.4-261.6) | 1.5<br>(0.9-2.3) | -8%<br>(-37%-25%)   | 6670.6<br>(4901.1-8998.5)   | 54.3<br>(39.9-73.2)  | -3%<br>(-22%-22%)   |
| Turkey               | 9431.7<br>(7440.3-11859.5) | 11.6<br>(9-15.1)    | 68%<br>(56%-83%)  | 214647.7<br>(177673.4-261314.4) | 248.7<br>(203.5-307.5) | 44%<br>(36%-53%) | 940<br>(631.5-1320)    | 1.1<br>(0.8-1.6) | -40%<br>(-59%--20%) | 37987.3<br>(28585.3-48454)  | 44<br>(33.2-55.7)    | -34%<br>(-50%--19%) |
| United Arab Emirates | 1693.9<br>(1239.4-2284)    | 17.7<br>(13.4-22.5) | 59%<br>(51%-68%)  | 32937<br>(26643-40007.9)        | 337.2<br>(273-413.9)   | 44%<br>(37%-51%) | 140.8<br>(79.2-245.8)  | 2.9<br>(1.7-4.8) | -18%<br>(-44%-20%)  | 8642.7<br>(5596.5-13672.6)  | 98<br>(69-145.7)     | -8%<br>(-33%-28%)   |
| Yemen                | 2878.8<br>(1919.1-4149.8)  | 10<br>(7.5-13.1)    | 59%<br>(50%-71%)  | 62329.3<br>(46070.7-82958.7)    | 222.5<br>(177.6-279.3) | 44%<br>(35%-55%) | 202.3<br>(135.1-291)   | 1.4<br>(0.9-2)   | -10%<br>(-34%-22%)  | 12555.9<br>(9115.9-16903.3) | 54.1<br>(39.7-71.8)  | -3%<br>(-28%-27%)   |

|             |                    |                    |           |                       |                        |           |                              |                  |            |                       |                       |            |
|-------------|--------------------|--------------------|-----------|-----------------------|------------------------|-----------|------------------------------|------------------|------------|-----------------------|-----------------------|------------|
| Afghanistan | 4308.9             |                    | 50%       | 80506.2               |                        | 40%       |                              |                  | -19%       | 27100.5               |                       | -19%       |
|             | (2787.4-6419.8)    | 11.8<br>(8.7-15.8) | (44%-56%) | (59837.9-107247.8)    | 248<br>(201.2-306.9)   | (34%-47%) | 462.5<br>(319.3-685.5)       | 2.9<br>(2-4.5)   | (-40%-5%)  | (19744-37947.8)       | 103.6<br>(76.7-145.5) | (-38%-3%)  |
| Bangladesh  | 9076.4             |                    | 46%       | 269084.2              |                        | 29%       |                              |                  | -25%       | 88000.2               |                       | -30%       |
|             | (6370.6-12357.3)   | 6<br>(4.3-8.1)     | (38%-56%) | (209241.3-349859.5)   | 168.2<br>(132.8-214.1) | (22%-37%) | 2015<br>(1463.9-2730)        | 1.6<br>(1.2-2.2) | (-44%-5%)  | (68096.6-113142.2)    | 60<br>(46.2-77.2)     | (-48%-9%)  |
| Bhutan      | 64.5               |                    | 45%       | 1721.2                |                        | 33%       |                              |                  | 16%        | 834                   |                       | 4%         |
|             | (45.1-89)          | 8.8<br>(6.3-12)    | (39%-52%) | (1348.6-2186.6)       | 222.7<br>(177.9-279.2) | (27%-40%) | 22.8<br>(14.9-32.5)          | 4.1<br>(2.6-5.8) | (-19%-65%) | (562.8-1165.7)        | 123.1<br>(84.5-172.1) | (-25%-51%) |
| India       | 95758              |                    | 2%        | 3051636.8             |                        | 7%        |                              |                  | -20%       | 1345414.7             |                       | -19%       |
|             | (86204.6-106086.5) | 7.2<br>(6.5-7.9)   | (0%-5%)   | (2783211.7-3325533.8) | 216.5<br>(198.2-235.4) | (5%-9%)   | 35304.9<br>(25812.1-46383.9) | 3.2<br>(2.3-4.2) | (-36%-1%)  | (1048734.6-1710765.7) | 103.2<br>(80.4-130)   | (-33%--1%) |
| Nepal       | 2849.5             |                    | 63%       | 66038.6               |                        | 45%       |                              |                  | 25%        | 30496.5               |                       | 12%        |
|             | (1974.5-3961.4)    | 9.6<br>(6.9-13.1)  | (56%-71%) | (51403.8-83619.7)     | 221.3<br>(176.4-273)   | (37%-54%) | 806.6<br>(514.8-1161.6)      | 3.7<br>(2.4-5.4) | (-10%-61%) | (21396.3-42434)       | 116.5<br>(81.8-163.8) | (-15%-42%) |
| Pakistan    | 20631              |                    | 34%       | 475223.9              |                        | 28%       |                              |                  | 50%        | 405988.5              |                       | 53%        |
|             | (15922.7-26166.3)  | 9<br>(7.2-11.1)    | (30%-38%) | (394503.4-560829.9)   | 231.9<br>(197.7-268.5) | (24%-31%) | 8949.3<br>(6121.5-12313.3)   | 6.9<br>(4.7-9.7) | (14%-89%)  | (288144.1-543642.9)   | 234<br>(165.3-313.6)  | (21%-89%)  |
| Angola      | 1786.2             |                    | 27%       | 39793.8               |                        | 23%       |                              |                  | -18%       | 29328.8               |                       | -23%       |
|             | (1100.8-2720.1)    | 5.2<br>(3.7-7.4)   | (21%-33%) | (29925-53078.9)       | 148.6<br>(118.7-186.7) | (17%-28%) | 573.1<br>(380.7-780.6)       | 3.9<br>(2.6-5.6) | (-39%-14%) | (20478.2-39257.8)     | 133.2<br>(94.2-178.1) | (-43%-4%)  |

|                                  |                           |                  |                  |                                |                        |                  |                         |                  |                    |                             |                        |                    |
|----------------------------------|---------------------------|------------------|------------------|--------------------------------|------------------------|------------------|-------------------------|------------------|--------------------|-----------------------------|------------------------|--------------------|
| Central African Republic         | 319.9<br>(197.7-480.4)    | 5.4<br>(3.7-7.6) | 21%<br>(16%-26%) | 6895<br>(5063-9179.3)          | 142.9<br>(111.2-183.8) | 16%<br>(12%-21%) | 160.1<br>(110.2-225.1)  | 5.4<br>(3.7-7.7) | -2%<br>(-26%-31%)  | 8066.7<br>(5740.3-11137)    | 194.1<br>(135.8-269.3) | -3%<br>(-27%-31%)  |
| Congo                            | 312.9<br>(198.9-451.1)    | 5.8<br>(3.9-7.9) | 21%<br>(16%-27%) | 7935.7<br>(5958.3-10449.4)     | 158.6<br>(123-203.2)   | 18%<br>(13%-23%) | 140.7<br>(91-200.2)     | 4.8<br>(3.1-6.8) | -21%<br>(-40%-5%)  | 6249.3<br>(4192.6-8748.5)   | 152.5<br>(104-211.7)   | -27%<br>(-47%-2%)  |
| Democratic Republic of the Congo | 4541.2<br>(2781.4-6827.3) | 4.8<br>(3.3-6.7) | 21%<br>(15%-27%) | 110692.1<br>(82169.7-146567.6) | 140.2<br>(110.5-176.5) | 15%<br>(11%-20%) | 1757.2<br>(1286.1-2334) | 3.9<br>(2.8-5.3) | -21%<br>(-40%-1%)  | 86174.9<br>(63993-114838.5) | 131.1<br>(98.9-170.1)  | -23%<br>(-41%--1%) |
| Equatorial Guinea                | 82.3<br>(50.4-122.6)      | 5.8<br>(4.1-7.9) | 51%<br>(43%-61%) | 2157.1<br>(1549.6-2919.9)      | 162.8<br>(126.9-208.5) | 39%<br>(31%-48%) | 28.6<br>(18.4-42.4)     | 4.6<br>(3-6.7)   | -10%<br>(-40%-35%) | 1408.2<br>(900.4-2099.1)    | 139.6<br>(92.8-205.3)  | -23%<br>(-49%-18%) |
| Gabon                            | 121.5<br>(80.1-175.2)     | 6.9<br>(4.9-9.6) | 35%<br>(29%-42%) | 3063.8<br>(2307.7-3995.7)      | 179.4<br>(139.9-228.6) | 25%<br>(20%-31%) | 65.1<br>(40.5-92.4)     | 5.8<br>(3.5-8.3) | 4%<br>(-27%-39%)   | 2653.9<br>(1754.9-3676.2)   | 182.3<br>(120-252.4)   | -5%<br>(-33%-28%)  |
| Burundi                          | 595.1<br>(366.2-886.9)    | 4.4<br>(3.1-6)   | 8%<br>(3%-14%)   | 14109.9<br>(10414.2-18778)     | 136.1<br>(107.1-172.2) | 11%<br>(6%-15%)  | 269.7<br>(196.2-364.8)  | 4.6<br>(3.2-6.4) | -22%<br>(-41%-1%)  | 13242.2<br>(9777.7-17649.4) | 152.1<br>(113.3-203)   | -27%<br>(-45%--2%) |
| Comoros                          | 38.4<br>(25.7-56.9)       | 5.3<br>(3.7-7.7) | 13%<br>(8%-19%)  | 1110.3<br>(859.6-1466.1)       | 158.4<br>(125.7-203.9) | 14%<br>(10%-19%) | 23.1<br>(15.9-31.4)     | 4.5<br>(3.1-6.1) | -12%<br>(-36%-52%) | 899.7<br>(623.7-1200.2)     | 144.3<br>(102.2-193.1) | -12%<br>(-39%-87%) |

|            |                               |                   |                  |                                  |                        |                  |                               |                  |                     |                                   |                        |                     |
|------------|-------------------------------|-------------------|------------------|----------------------------------|------------------------|------------------|-------------------------------|------------------|---------------------|-----------------------------------|------------------------|---------------------|
| Djibouti   | 69.8<br>(46.3-99.8)           | 5.6<br>(4-7.6)    | 28%<br>(22%-35%) | 1881.9<br>(1426.7-<br>2421.7)    | 161.2<br>(126.2-201.8) | 23%<br>(18%-30%) | 32.2<br>(21.4-46.6)           | 4.9<br>(3.3-7)   | 12%<br>(-18%-53%)   | 1488.5<br>(995.5-2111.1)          | 155.5<br>(107.2-216.6) | 10%<br>(-22%-51%)   |
| Eritrea    | 375.3<br>(232.1-565.4)        | 5.3<br>(3.6-7.4)  | 24%<br>(18%-31%) | 9313<br>(6904.5-<br>12582.3)     | 149.2<br>(117.8-193.9) | 23%<br>(17%-28%) | 175.3<br>(109-258.8)          | 5.1<br>(3.1-7.3) | 3%<br>(-25%-48%)    | 8668.7<br>(5506.1-<br>12688.5)    | 170.4<br>(109.5-245.2) | -2%<br>(-28%-40%)   |
| Ethiopia   | 5357.6<br>(4182-6738.2)       | 4.5<br>(3.8-5.5)  | 8%<br>(4%-12%)   | 136902<br>(115406.3-<br>163216)  | 141.8<br>(123.7-162.6) | 12%<br>(9%-15%)  | 2132.3<br>(1680.1-<br>2688.3) | 4.3<br>(3.2-5.7) | -43%<br>(-55%--28%) | 96907.3<br>(78405.8-<br>118556.6) | 127.7<br>(102.5-159.3) | -50%<br>(-61%--37%) |
| Kenya      | 2398.9<br>(2100.4-<br>2706.2) | 4.7<br>(4.2-5.2)  | 25%<br>(21%-30%) | 66900.4<br>(60470.2-<br>74297.6) | 144.2<br>(132-156.9)   | 17%<br>(15%-20%) | 1206.9<br>(909.3-1550.5)      | 5<br>(3.6-6.6)   | 18%<br>(-1%-40%)    | 51230.4<br>(40216.1-<br>64577.2)  | 144.7<br>(112-182.5)   | 17%<br>(-2%-39%)    |
| Madagascar | 1280.3<br>(782.3-1882.7)      | 4.4<br>(3-6.2)    | 12%<br>(7%-18%)  | 33310.1<br>(25015.5-<br>43277.3) | 137.5<br>(109.2-172.1) | 11%<br>(7%-15%)  | 504.4<br>(357.8-699.8)        | 3.7<br>(2.5-5.3) | -19%<br>(-39%-4%)   | 25027.1<br>(18607.4-<br>33557.7)  | 124.2<br>(91-168.4)    | -26%<br>(-43%--5%)  |
| Malawi     | 950.2<br>(583-1414.7)         | 4.9<br>(3.4-6.7)  | 23%<br>(17%-29%) | 28564.6<br>(20493.4-<br>39258.7) | 186.7<br>(140.7-247.8) | 15%<br>(10%-21%) | 440.2<br>(329.7-576.6)        | 4.7<br>(3.4-6.2) | -10%<br>(-30%-14%)  | 21547.1<br>(16179.5-<br>28716.6)  | 154.3<br>(117.7-199.9) | -16%<br>(-35%-13%)  |
| Mauritius  | 214.4<br>(159.6-279.4)        | 16<br>(11.3-21.8) | 60%<br>(38%-76%) | 5724.4<br>(4691.7-<br>6896.8)    | 398.4<br>(318.2-490.2) | 47%<br>(34%-58%) | 44.4<br>(30.1-64.2)           | 2.7<br>(1.9-3.9) | 62%<br>(31%-98%)    | 1899.3<br>(1438.5-<br>2483.3)     | 123.2<br>(94.6-157.6)  | 65%<br>(41%-92%)    |

|                             |                           |                    |                  |                              |                        |                  |                         |                  |                     |                              |                        |                     |
|-----------------------------|---------------------------|--------------------|------------------|------------------------------|------------------------|------------------|-------------------------|------------------|---------------------|------------------------------|------------------------|---------------------|
|                             | 1801.3                    |                    | 38%              | 39787.6                      |                        | 29%              |                         |                  | 11%                 | 36436.7                      |                        | 11%                 |
| Mozambique                  | (1057.1-2640.1)           | 5.2<br>(3.5-7.1)   | (32%-44%)        | (29041.9-52829.2)            | 153.4<br>(120.5-193.4) | (22%-36%)        | 700.9<br>(509-939.5)    | 4.7<br>(3.4-6.4) | (-20%-49%)          | (26282.5-48542.1)            | 163<br>(122-217)       | (-18%-46%)          |
| Rwanda                      | 606.6<br>(384.1-880.3)    | 4.7<br>(3.2-6.4)   | 9%<br>(4%-16%)   | 16966.3<br>(12770.6-22089.4) | 143.4<br>(112.9-178.9) | 12%<br>(8%-17%)  | 293.3<br>(209.2-394.7)  | 4.2<br>(3-5.8)   | -33%<br>(-48%--13%) | 13516.7<br>(9848.9-17831.2)  | 135.7<br>(99.9-179.9)  | -38%<br>(-52%--19%) |
| Seychelles                  | 12<br>(9.2-15.4)          | 11.2<br>(8.3-14.8) | 45%<br>(37%-54%) | 342.5<br>(285.3-408.2)       | 306.8<br>(252.4-372.2) | 35%<br>(28%-42%) | 1.7<br>(1.2-2.3)        | 1.7<br>(1.2-2.3) | 45%<br>(24%-69%)    | 86.5<br>(66.8-110.3)         | 77.9<br>(60.4-97.6)    | 48%<br>(31%-67%)    |
| Somalia                     | 1187.2<br>(739.5-1787.3)  | 4.9<br>(3.5-6.7)   | 12%<br>(8%-17%)  | 25305.1<br>(18729.8-33851.5) | 142.9<br>(113.3-181.9) | 14%<br>(9%-18%)  | 521.3<br>(373.2-708.1)  | 5.5<br>(3.7-7.6) | -9%<br>(-30%-22%)   | 27585.9<br>(19931.2-37539.5) | 186.8<br>(135.6-249.4) | -7%<br>(-29%-24%)   |
| United Republic of Tanzania | 3043.2<br>(1953.3-4490.9) | 4.8<br>(3.4-6.5)   | 17%<br>(11%-25%) | 75467<br>(57246.5-97704)     | 149.6<br>(120.2-185.8) | 19%<br>(13%-25%) | 2078<br>(1640-2613.9)   | 7.5<br>(5.8-9.8) | 23%<br>(-4%-57%)    | 86580.4<br>(67994.5-109446)  | 217.6<br>(171.8-270.8) | 15%<br>(-11%-48%)   |
| Uganda                      | 1907.4<br>(1203.7-2827.2) | 4.1<br>(3-5.7)     | 23%<br>(18%-29%) | 46213.9<br>(34038.1-62300.4) | 131.9<br>(105.2-167.3) | 17%<br>(13%-23%) | 832.5<br>(599.4-1131.9) | 4.4<br>(3.1-6)   | 0%<br>(-22%-27%)    | 41418.3<br>(29493-57071.8)   | 141.3<br>(102-188.9)   | 2%<br>(-22%-33%)    |
| Zambia                      | 1153.3<br>(718.4-1733.5)  | 5.8<br>(4.1-8.1)   | 22%<br>(17%-28%) | 27162.2<br>(20265.3-36623.6) | 164.4<br>(130.6-207.5) | 22%<br>(17%-27%) | 493.5<br>(366.2-661.9)  | 5.5<br>(3.9-7.5) | -12%<br>(-34%-15%)  | 25079.3<br>(19011.7-32844.4) | 183.9<br>(139.2-243.8) | -15%<br>(-34%-9%)   |

|              |                               |                    |                  |                                   |                        |                  |                               |                  |                    |                                   |                        |                    |
|--------------|-------------------------------|--------------------|------------------|-----------------------------------|------------------------|------------------|-------------------------------|------------------|--------------------|-----------------------------------|------------------------|--------------------|
| Botswana     | 210<br>(145.6-292.9)          | 9.2<br>(6.6-12.4)  | 41%<br>(35%-47%) | 4914.7<br>(3828.2-<br>6239.8)     | 211.7<br>(170.8-263.9) | 34%<br>(28%-40%) | 72<br>(44.6-111.3)            | 4.6<br>(3-6.9)   | 27%<br>(-14%-78%)  | 3198.6<br>(2062-4821.7)           | 158.4<br>(101.7-236)   | 29%<br>(-13%-82%)  |
| Lesotho      | 187.4<br>(129.1-267)          | 9.1<br>(6.6-12.4)  | 45%<br>(38%-51%) | 4090.9<br>(3167-5260.2)           | 201.2<br>(162-250.4)   | 32%<br>(26%-39%) | 87.8<br>(55.9-129.2)          | 6.3<br>(4.1-9)   | 91%<br>(34%-163%)  | 3688.5<br>(2445.2-<br>5299.2)     | 213<br>(141.9-304.2)   | 92%<br>(32%-161%)  |
| Namibia      | 175.3<br>(118.9-243.4)        | 7.6<br>(5.5-10)    | 26%<br>(20%-32%) | 4044.4<br>(3135.7-<br>5174.7)     | 180.5<br>(146.1-221.5) | 23%<br>(18%-28%) | 51.6<br>(33.3-77.4)           | 3.5<br>(2.2-5.2) | -6%<br>(-32%-28%)  | 2059.9<br>(1370.9-<br>2997.8)     | 110<br>(73.8-157.7)    | -5%<br>(-32%-34%)  |
| South Africa | 4914.3<br>(4236.4-<br>5689.8) | 9<br>(7.8-10.3)    | 23%<br>(18%-29%) | 121675.3<br>(107739-<br>137341.3) | 215<br>(191.1-241.6)   | 19%<br>(16%-22%) | 2202.5<br>(1674.8-<br>2817.7) | 4.9<br>(3.7-6.4) | 10%<br>(-7%-27%)   | 80906.9<br>(64456.6-<br>100162.6) | 153.4<br>(122.4-190.1) | -6%<br>(-19%-7%)   |
| Eswatini     | 122.7<br>(81.7-173.7)         | 10.9<br>(7.7-14.8) | 42%<br>(35%-48%) | 2530.2<br>(1946.5-<br>3316.6)     | 235.5<br>(189.5-295.3) | 32%<br>(26%-39%) | 43.9<br>(28.6-63.7)           | 6.4<br>(4.3-9.2) | 37%<br>(-1%-93%)   | 2008.7<br>(1333.7-<br>2868.6)     | 225.4<br>(150.5-320.9) | 42%<br>(1%-101%)   |
| Zimbabwe     | 1104.9<br>(731-1577.9)        | 7.5<br>(5.4-10.1)  | 18%<br>(13%-22%) | 31698.8<br>(22476.2-<br>42366)    | 222.3<br>(170-283.4)   | 26%<br>(20%-34%) | 385.8<br>(255-578.3)          | 4.8<br>(3.2-7.4) | 41%<br>(8%-84%)    | 17129.8<br>(11718-25069)          | 158.9<br>(109.5-230.5) | 47%<br>(12%-93%)   |
| Benin        | 1115.1<br>(670.1-1684)        | 7.7<br>(5.3-10.8)  | 25%<br>(20%-30%) | 21738.5<br>(15594.7-<br>30069.5)  | 188.9<br>(145.6-242.1) | 21%<br>(16%-26%) | 327<br>(211.8-468.3)          | 4.5<br>(3.1-6.3) | -12%<br>(-35%-17%) | 18034.5<br>(11850.2-<br>26375.7)  | 168.9<br>(113.1-236.9) | -12%<br>(-37%-17%) |

|               |                 |                    |           |                   |                        |           |                         |                  |            |                   |                        |            |
|---------------|-----------------|--------------------|-----------|-------------------|------------------------|-----------|-------------------------|------------------|------------|-------------------|------------------------|------------|
|               | 1823.2          |                    | 31%       | 36031.6           |                        | 24%       |                         |                  | 2%         | 34879.6           |                        | 8%         |
| Burkina Faso  | (1098.5-2788.9) | 6.8<br>(4.6-9.7)   | (26%-37%) | (26189.3-49666.1) | 173.8<br>(135.3-226.6) | (19%-30%) | 597.1<br>(421.4-804.7)  | 4.3<br>(3.1-5.7) | (-21%-29%) | (24206.1-48091)   | 165.9<br>(120.7-220.6) | (-17%-37%) |
|               |                 |                    | 34%       | 68759.7           |                        | 30%       |                         |                  | -11%       | 45066.7           |                        | -7%        |
| Cameroon      | (2080-5084.8)   | 10.9<br>(7.3-15.4) | (28%-41%) | (49008.4-92471.9) | 248.6<br>(193.7-318.3) | (24%-36%) | 800.3<br>(507.4-1144.1) | 4.6<br>(3.1-6.6) | (-34%-22%) | (29172.7-63205.4) | 180.1<br>(120.8-251)   | (-33%-30%) |
|               |                 |                    | 48%       | 1197              |                        | 35%       |                         |                  | 28%        | 558.6             |                        | 7%         |
| Cabo Verde    | (30.9-64)       | 8.2<br>(5.7-11.4)  | (41%-58%) | (913.8-1532)      | 207.6<br>(162.4-263)   | (28%-43%) | 14.3<br>(10.8-18.5)     | 3<br>(2.3-4)     | (3%-55%)   | (432.7-701)       | 104.7<br>(81.8-132.4)  | (-13%-30%) |
|               |                 |                    | 26%       | 25021.9           |                        | 20%       |                         |                  | -3%        | 22379.6           |                        | -3%        |
| Chad          | (814.9-2131.2)  | 7.1<br>(4.7-9.9)   | (21%-31%) | (17414.3-34506.4) | 175.1<br>(133.5-224.9) | (15%-26%) | 396.4<br>(273.2-559.9)  | 4.5<br>(3.1-6.4) | (-25%-26%) | (15436.2-32027.2) | 168.7<br>(118.2-232.9) | (-26%-26%) |
|               |                 |                    | 19%       | 50419             |                        | 17%       |                         |                  | -17%       | 33124             |                        | -15%       |
| Côte d'Ivoire | (1542.6-3608.2) | 8.5<br>(5.9-12)    | (14%-25%) | (37518-68677.4)   | 203.5<br>(161.2-261.4) | (12%-21%) | 602.6<br>(400.4-856.2)  | 4<br>(2.7-5.5)   | (-38%-9%)  | (22247.9-46977.7) | 150.6<br>(105.3-206.9) | (-39%-14%) |
|               |                 |                    | 30%       | 3888.6            |                        | 22%       |                         |                  | 1%         | 2804.5            |                        | 0%         |
| Gambia        | (112.4-264.7)   | 7.5<br>(5.2-10.4)  | (25%-36%) | (2768.6-5189.8)   | 185.4<br>(142.9-237.2) | (17%-28%) | 57.2<br>(39.8-79)       | 4.5<br>(3.1-6.1) | (-28%-41%) | (1933-3864.2)     | 156.8<br>(111.4-213.8) | (-31%-44%) |
|               |                 |                    | 39%       | 55245.7           |                        | 29%       |                         |                  | 6%         | 47177.4           |                        | 4%         |
| Ghana         | (1479-3398.8)   | 7.1<br>(4.9-9.9)   | (33%-45%) | (41207.9-72303.8) | 180.5<br>(141.1-227.8) | (23%-35%) | 967.9<br>(645.1-1343.8) | 4.8<br>(3.2-6.6) | (-28%-42%) | (32958-64059.6)   | 172.8<br>(119.5-235.3) | (-28%-42%) |



|               |                                |                   |                  |                                     |                        |                  |                               |                  |                     |                                   |                        |                     |
|---------------|--------------------------------|-------------------|------------------|-------------------------------------|------------------------|------------------|-------------------------------|------------------|---------------------|-----------------------------------|------------------------|---------------------|
| Guinea        | 1083.4<br>(684-1622.9)         | 7.6<br>(5.3-10.6) | 27%<br>(22%-32%) | 21155.1<br>(15378.2-<br>28445.1)    | 183.5<br>(142.7-232.6) | 21%<br>(16%-26%) | 395.4<br>(283.4-543.1)        | 5.1<br>(3.6-7.1) | -11%<br>(-33%-14%)  | 20773.6<br>(14900.8-<br>28611.4)  | 193.7<br>(140.6-261.5) | -13%<br>(-35%-14%)  |
| Guinea-Bissau | 175.2<br>(108.7-261.2)         | 8.4<br>(5.8-11.8) | 18%<br>(13%-22%) | 3533.4<br>(2595.8-<br>4761.2)       | 196.9<br>(154.1-249.4) | 18%<br>(14%-23%) | 63.1<br>(44.7-86.3)           | 5.8<br>(4.2-7.9) | -26%<br>(-44%--1%)  | 3366.4<br>(2418.6-<br>4550.6)     | 219.3<br>(158.5-293.8) | -27%<br>(-46%--1%)  |
| Liberia       | 367.7<br>(237-546.8)           | 7.4<br>(5.2-10.3) | 27%<br>(21%-32%) | 8491.9<br>(6302.1-<br>11225.1)      | 185.6<br>(145-236)     | 21%<br>(17%-27%) | 126<br>(82.5-186.6)           | 4.4<br>(3-6.6)   | -26%<br>(-47%--2%)  | 6464.2<br>(4298.8-<br>9479.5)     | 160.8<br>(108.7-233.2) | -32%<br>(-52%--5%)  |
| Mali          | 2818.8<br>(1583.4-<br>4458.9)  | 9.9<br>(6.3-14.5) | 23%<br>(17%-30%) | 34866.4<br>(24621.4-<br>47351.2)    | 177<br>(136.4-226.2)   | 19%<br>(15%-24%) | 565.8<br>(381.9-796.9)        | 4.4<br>(3-6.1)   | -21%<br>(-40%-2%)   | 31907.8<br>(21230.6-<br>44869.9)  | 168.2<br>(116.7-230.4) | -23%<br>(-44%-2%)   |
| Mauritania    | 334.6<br>(212.7-493)           | 8<br>(5.5-11.3)   | 22%<br>(17%-27%) | 7563.9<br>(5623-10035)              | 199.4<br>(156.6-252.8) | 19%<br>(14%-24%) | 92.2<br>(59.4-130.3)          | 3.8<br>(2.5-5.4) | -40%<br>(-55%--22%) | 4251.3<br>(2775.5-<br>6111.8)     | 130<br>(87.2-180.6)    | -42%<br>(-59%--22%) |
| Niger         | 1903.8<br>(1171.2-2893)        | 6.7<br>(4.6-9.4)  | 17%<br>(11%-22%) | 47898.8<br>(31686.4-<br>69275.7)    | 220.5<br>(161.1-292)   | 14%<br>(8%-21%)  | 491.7<br>(325.6-703.4)        | 4<br>(2.7-5.6)   | -25%<br>(-43%--2%)  | 28955<br>(19070.9-<br>41131)      | 151.2<br>(104-212.4)   | -29%<br>(-48%--6%)  |
| Nigeria       | 16732<br>(14764.7-<br>19056.2) | 7<br>(6.3-7.8)    | 20%<br>(15%-26%) | 360864.8<br>(322147.8-<br>403726.6) | 182.1<br>(165.2-199.3) | 16%<br>(13%-20%) | 5145.8<br>(3672.5-<br>6918.9) | 4.7<br>(3.4-6.4) | -3%<br>(-30%-30%)   | 257405<br>(185955.8-<br>344580.9) | 152.4<br>(111.9-203.9) | -18%<br>(-39%-9%)   |

|                       |                          |                     |                  |                              |                        |                  |                        |                  |                    |                             |                        |                    |
|-----------------------|--------------------------|---------------------|------------------|------------------------------|------------------------|------------------|------------------------|------------------|--------------------|-----------------------------|------------------------|--------------------|
| Sao Tome and Principe | 21.9<br>(13.9-32.4)      | 10.4<br>(7.2-14.8)  | 31%<br>(26%-37%) | 500.4<br>(374.9-667.5)       | 246.2<br>(193.6-313.9) | 26%<br>(21%-32%) | 8.7<br>(6.3-11.5)      | 6.8<br>(4.8-9.1) | 10%<br>(-15%-46%)  | 401.5<br>(303.5-522.6)      | 233.7<br>(174.1-305.1) | 1%<br>(-23%-40%)   |
| Senegal               | 1127.6<br>(705.1-1672.3) | 7<br>(4.9-9.7)      | 13%<br>(7%-20%)  | 24776.3<br>(18151.9-33274.6) | 174.9<br>(136-223.1)   | 11%<br>(6%-16%)  | 431.2<br>(294.7-619.4) | 4.6<br>(3.2-6.5) | -21%<br>(-40%-3%)  | 20735<br>(13922.2-29835.2)  | 163.4<br>(113.3-231)   | -24%<br>(-45%-2%)  |
| Sierra Leone          | 656.3<br>(416.3-996.1)   | 7.2<br>(5-10.1)     | 28%<br>(22%-33%) | 14481.3<br>(10796.2-19638)   | 183.9<br>(144.3-236.5) | 21%<br>(16%-27%) | 215.8<br>(147.2-305.8) | 4.1<br>(2.8-5.7) | -15%<br>(-37%-14%) | 11961.3<br>(8030.5-17023.4) | 160.7<br>(111.7-224.2) | -14%<br>(-38%-18%) |
| Togo                  | 639.6<br>(397.6-938.2)   | 7.6<br>(5.2-10.5)   | 22%<br>(17%-27%) | 14025.9<br>(10406.7-18448.1) | 186.9<br>(146.5-236.4) | 17%<br>(13%-22%) | 201.9<br>(141.1-282.7) | 4.2<br>(3-5.9)   | -14%<br>(-36%-11%) | 10374.5<br>(7400.2-14118.1) | 156.1<br>(112.4-213.5) | -14%<br>(-37%-11%) |
| American Samoa        | 7.6<br>(5.5-10.3)        | 13.9<br>(10.1-18.8) | 39%<br>(33%-45%) | 198.9<br>(159.4-244.7)       | 365<br>(295.2-445.9)   | 31%<br>(26%-37%) | 1.9<br>(1.4-2.7)       | 4.1<br>(3-5.8)   | 48%<br>(21%-83%)   | 82<br>(61.1-108.7)          | 157.5<br>(118-207.7)   | 52%<br>(25%-85%)   |
| Bermuda               | 7.4<br>(5.9-9.2)         | 10.5<br>(7.7-14)    | 53%<br>(44%-62%) | 189<br>(160.7-221.6)         | 251.2<br>(203.2-314.5) | 35%<br>(27%-42%) | 3<br>(2.1-4.2)         | 2.5<br>(1.8-3.4) | -18%<br>(-33%-1%)  | 88.5<br>(68.6-115.4)        | 91.6<br>(72.1-115.7)   | -10%<br>(-25%-6%)  |
| Cook Islands          | 2.1<br>(1.6-2.7)         | 11.5<br>(8.3-15.3)  | 48%<br>(41%-55%) | 60.6<br>(50.2-72.1)          | 317.9<br>(257.3-386.2) | 34%<br>(27%-40%) | 0.5<br>(0.3-0.6)       | 2<br>(1.4-2.8)   | 22%<br>(-4%-57%)   | 18<br>(13.4-23.6)           | 86.4<br>(64.4-113.5)   | 29%<br>(4%-58%)    |
| Greenland             | 3<br>(2.4-3.8)           | 5<br>(3.8-6.5)      | 17%<br>(11%-23%) | 90.7<br>(76.4-109)           | 147.8<br>(121.6-182.7) | 6%<br>(1%-10%)   | 1.1<br>(0.8-1.6)       | 1.9<br>(1.3-2.6) | 10%<br>(-14%-37%)  | 32.1<br>(23.8-43.2)         | 48.1<br>(36.6-62.9)    | 3%<br>(-17%-23%)   |

|                             |                        |                     |                  |                                |                        |                  |                        |                  |                   |                                |                        |                   |
|-----------------------------|------------------------|---------------------|------------------|--------------------------------|------------------------|------------------|------------------------|------------------|-------------------|--------------------------------|------------------------|-------------------|
| Guam                        | 20.6<br>(14.6-28.1)    | 12<br>(8.3-16.7)    | 49%<br>(44%-56%) | 579.8<br>(469.8-719.5)         | 335<br>(268.6-420.7)   | 37%<br>(31%-44%) | 4<br>(2.9-5.5)         | 2.2<br>(1.6-3)   | 35%<br>(9%-68%)   | 182.2<br>(138-238.9)           | 102.1<br>(77.4-134)    | 64%<br>(39%-92%)  |
| Monaco                      | 2.2<br>(1.8-2.6)       | 4.1<br>(3.2-5.3)    | 11%<br>(4%-17%)  | 54.7<br>(46.6-63.2)            | 114.4<br>(93.2-140.6)  | 4%<br>(0%-8%)    | 0.8<br>(0.5-1.2)       | 0.7<br>(0.5-1.1) | 44%<br>(13%-80%)  | 15<br>(11-20.1)                | 20.7<br>(15.6-26.8)    | 16%<br>(-2%-38%)  |
| Nauru                       | 1.5<br>(1-2.3)         | 13.8<br>(9.6-19.6)  | 36%<br>(31%-41%) | 36.6<br>(28-46.5)              | 369.6<br>(297.4-451.7) | 30%<br>(25%-35%) | 0.3<br>(0.2-0.4)       | 4.8<br>(3.2-6.8) | 34%<br>(5%-66%)   | 16.2<br>(11.2-22.8)            | 194.5<br>(136.1-266.8) | 35%<br>(11%-62%)  |
| Niue                        | 0.2<br>(0.2-0.3)       | 13.4<br>(9.5-18.4)  | 47%<br>(41%-53%) | 6.2<br>(5.2-7.5)               | 359<br>(291.2-438.3)   | 35%<br>(29%-42%) | 0.1<br>(0-0.1)         | 3.3<br>(2.1-4.8) | 30%<br>(-2%-71%)  | 2.5<br>(1.8-3.5)               | 134.9<br>(96.8-186.6)  | 32%<br>(2%-70%)   |
| Northern<br>Mariana Islands | 6.2<br>(4.7-7.9)       | 13.7<br>(10.1-18.3) | 23%<br>(15%-32%) | 170.2<br>(141.5-201.2)         | 355.8<br>(286.4-431.5) | 22%<br>(16%-29%) | 1.7<br>(1.2-2.5)       | 3.8<br>(2.8-5.3) | 22%<br>(-4%-50%)  | 73.1<br>(55.1-96.7)            | 142.7<br>(110.5-185.3) | 21%<br>(-1%-47%)  |
| Palau                       | 2.8<br>(2.1-3.7)       | 15.4<br>(10.7-21.3) | 38%<br>(32%-45%) | 81.2<br>(67.5-98.3)            | 399.2<br>(324.5-495.8) | 31%<br>(26%-37%) | 1<br>(0.7-1.4)         | 5<br>(3.5-6.9)   | 28%<br>(-6%-67%)  | 42.5<br>(30.5-58.3)            | 197.5<br>(144.1-263.3) | 32%<br>(0%-65%)   |
| Puerto Rico                 | 448.7<br>(362.2-557.3) | 12.6<br>(9.4-16.7)  | 48%<br>(39%-57%) | 12396.5<br>(10674-<br>14489.3) | 309.9<br>(255.2-380.2) | 36%<br>(30%-44%) | 299.5<br>(200.1-438.4) | 4.5<br>(3-6.4)   | -6%<br>(-28%-19%) | 8142.5<br>(6004.7-<br>11161.7) | 156<br>(116.7-206.9)   | 1%<br>(-18%-24%)  |
| Saint Kitts and<br>Nevis    | 11.8<br>(8.8-15.9)     | 20.2<br>(14.2-28)   | 43%<br>(32%-54%) | 210.5<br>(174-251.6)           | 318.8<br>(259.3-387.2) | 31%<br>(26%-37%) | 6.2<br>(4.2-8.7)       | 9.3<br>(6.5-13)  | 3%<br>(-20%-29%)  | 206.8<br>(142.2-282.6)         | 293.3<br>(207.4-394.3) | -3%<br>(-28%-26%) |
| San Marino                  | 1.4<br>(1.2-1.8)       | 3.6<br>(2.8-4.7)    | 9%<br>(3%-15%)   | 42.4<br>(35.9-50)              | 108.5<br>(88.2-133.3)  | 3%<br>(-1%-7%)   | 0.4<br>(0.3-0.7)       | 0.6<br>(0.3-0.9) | 22%<br>(-19%-72%) | 9.1<br>(6.3-12.7)              | 17.1<br>(12.3-23.4)    | 7%<br>(-16%-35%)  |

|                |                         |                    |                  |                             |                        |                  |                        |                  |                   |                             |                        |                    |
|----------------|-------------------------|--------------------|------------------|-----------------------------|------------------------|------------------|------------------------|------------------|-------------------|-----------------------------|------------------------|--------------------|
| Tokelau        | 0.2<br>(0.1-0.2)        | 11.1<br>(7.8-15.4) | 55%<br>(49%-63%) | 4.2<br>(3.4-5.2)            | 311<br>(252-383.6)     | 37%<br>(31%-44%) | 0<br>(0-0.1)           | 2.8<br>(1.9-4.2) | 20%<br>(-13%-60%) | 1.5<br>(1.1-2.2)            | 116<br>(81.4-164.9)    | 25%<br>(-7%-61%)   |
| Tuvalu         | 1.3<br>(0.9-1.8)        | 11.1<br>(7.9-15.1) | 49%<br>(42%-56%) | 36.1<br>(28.8-44.7)         | 309.2<br>(249.6-380.5) | 33%<br>(27%-40%) | 0.3<br>(0.2-0.5)       | 3.5<br>(2.3-5.3) | 21%<br>(-12%-65%) | 15.6<br>(11-22.5)           | 139.6<br>(98.6-199.8)  | 19%<br>(-10%-57%)  |
| United States  | 13.2<br>(10.5-16.5)     | 12.3<br>(9.1-16.3) | 48%<br>(41%-55%) | 329.3<br>(281.4-386.9)      | 289.2<br>(236.9-354.9) | 35%<br>(28%-42%) | 9<br>(6.4-12.6)        | 5.3<br>(3.8-7.2) | 35%<br>(3%-70%)   | 265.4<br>(196.9-354.4)      | 178.2<br>(135.2-231.9) | 26%<br>(-2%-57%)   |
| Virgin Islands |                         |                    |                  |                             |                        |                  |                        |                  |                   |                             |                        |                    |
| South Sudan    | 496.6<br>(296.6-743.8)  | 4.7<br>(3.2-6.5)   | 16%<br>(11%-21%) | 11346.9<br>(8272.5-14838.3) | 139.3<br>(109-174.8)   | 14%<br>(10%-19%) | 219.1<br>(148-313.7)   | 4.7<br>(3.1-6.9) | -7%<br>(-31%-26%) | 10547.8<br>(7426.8-15006.8) | 148.7<br>(102.8-211.5) | -10%<br>(-33%-25%) |
| Sudan          | 4026<br>(2711.4-5723.7) | 11<br>(8.2-14.5)   | 72%<br>(64%-81%) | 87323.8<br>(66579-114556)   | 239.7<br>(195.1-298.1) | 53%<br>(44%-62%) | 434.9<br>(270.9-709.5) | 2.1<br>(1.3-3.6) | -8%<br>(-39%-39%) | 22976<br>(15522.9-32903.1)  | 74.3<br>(50.4-111.8)   | -8%<br>(-36%-31%)  |

Supplemental Table 6. The incidence, prevalence, deaths and disability-adjusted life-years of CKD due to glomerulonephritis in 2019, and percentage change by sociodemographic-index quintiles from 1990 to 2019.

|                                    | Incidence                       |                                                    |                                                                | Prevalence                      |                                                    |                                                                | Deaths                          |                                                    |                                                                | Disability-adjusted life-years  |                                                    |                                                                |
|------------------------------------|---------------------------------|----------------------------------------------------|----------------------------------------------------------------|---------------------------------|----------------------------------------------------|----------------------------------------------------------------|---------------------------------|----------------------------------------------------|----------------------------------------------------------------|---------------------------------|----------------------------------------------------|----------------------------------------------------------------|
|                                    | Number in 2019 (×1000) (95% UI) | Age-standardized rate per 100,000 in 2019 (95% UI) | Change of age-standardized rate between 1990 and 2019 (95% UI) | Number in 2019 (×1000) (95% UI) | Age-standardized rate per 100,000 in 2019 (95% UI) | Change of age-standardized rate between 1990 and 2019 (95% UI) | Number in 2019 (×1000) (95% UI) | Age-standardized rate per 100,000 in 2019 (95% UI) | Change of age-standardized rate between 1990 and 2019 (95% UI) | Number in 2019 (×1000) (95% UI) | Age-standardized rate per 100,000 in 2019 (95% UI) | Change of age-standardized rate between 1990 and 2019 (95% UI) |
| High sociodemographic index        | 78<br>(72.1-84.5)               | 6.8<br>(6.2-7.5)                                   | 12%<br>(9%-16%)                                                | 2106.3<br>(1955.5-2260.6)       | 179.5<br>(165.4-195.1)                             | 9%<br>(7%-11%)                                                 | 25.8<br>(18.8-35.1)             | 1.3<br>(1-1.7)                                     | 6%<br>(-2%-15%)                                                | 635.7<br>(526.3-774.2)          | 42.5<br>(35.4-50.6)                                | 5%<br>(-1%-10%)                                                |
| High-middle sociodemographic index | 102<br>(92.5-112.4)             | 7.1<br>(6.4-7.9)                                   | 16%<br>(13%-18%)                                               | 3271.4<br>(3002.6-3554.5)       | 205.7<br>(187.7-225.5)                             | 10%<br>(8%-12%)                                                | 25.9<br>(20-32.9)               | 1.4<br>(1.1-1.7)                                   | -19%<br>(-26%--11%)                                            | 842.5<br>(709.8-1001.6)         | 47.7<br>(40.2-56.2)                                | -23%<br>(-29%--17%)                                            |
| Middle sociodemographic index      | 211.9<br>(194.4-231.2)          | 9<br>(8.2-9.8)                                     | 27%<br>(24%-30%)                                               | 6268.8<br>(5771.6-6761.6)       | 248.2<br>(228.4-268.4)                             | 21%<br>(18%-23%)                                               | 59<br>(46.8-74.1)               | 2.5<br>(2-3.2)                                     | 10%<br>(-1%-21%)                                               | 2256<br>(1879.5-2702.6)         | 89<br>(74.9-105.6)                                 | 2%<br>(-7%-12%)                                                |
| Low-middle sociodemographic index  | 135.6<br>(122.5-150.6)          | 7.9<br>(7.2-8.7)                                   | 20%<br>(17%-23%)                                               | 3829.9<br>(3507.2-4147.4)       | 219.4<br>(201.8-237)                               | 16%<br>(15%-18%)                                               | 46.7<br>(36.5-58.7)             | 3.4<br>(2.6-4.3)                                   | 2%<br>(-10%-16%)                                               | 1906.1<br>(1554.3-2288)         | 117.7<br>(96-142.5)                                | -0.4%<br>(-12%-12%)                                            |

|                      |             |         |           |          |               |           |             |           |           |          |             |              |
|----------------------|-------------|---------|-----------|----------|---------------|-----------|-------------|-----------|-----------|----------|-------------|--------------|
| Low sociodemographic | 78.4        | 6.6     | 14%       | 1820.7   | 180.3         | 18%       | 26.1        | 4.2       | -8%       | 1255.5   | 142.6       | -12%         |
| index                | (70.3-87.9) | (6-7.2) | (11%-17%) | (1656.9- | (165.1-196.6) | (16%-20%) | (21.1-31.8) | (3.3-5.3) | (-18%-3%) | (1026.4- | (117.4-171) | (-22%--0.3%) |
|                      |             |         |           | 2005.3)  |               |           |             |           |           | 1519.9)  |             |              |

---

Supplemental Table 7. Change in the disability-adjusted life-years of CKD due to glomerulonephritis decomposed by three population-level determinants: population aging, population growth and epidemiological change from 1990 to 2019 at the regional and national level

| Location            | Overall difference | Change due to population-level determinants (%contribution to the total change) |                   |                        |
|---------------------|--------------------|---------------------------------------------------------------------------------|-------------------|------------------------|
|                     |                    | Population aging                                                                | Population growth | Epidemiological change |
| <b>Central Asia</b> | 32388.7            | 5531.5 (17%)                                                                    | 18324.2 (57%)     | 8533 (26%)             |
| Armenia             | 1093.5             | 267.7 (24%)                                                                     | -123 (-11%)       | 948.8 (87%)            |
| Azerbaijan          | 4108.4             | 655.3 (16%)                                                                     | 2279.3 (55%)      | 1173.8 (29%)           |
| Georgia             | 5552.5             | 804.1 (14%)                                                                     | 1308.1 (24%)      | 3440.3 (62%)           |
| Kazakhstan          | 1994.6             | 794.6 (40%)                                                                     | 1177.9 (59%)      | 22.1 (1%)              |
| Kyrgyzstan          | 173.7              | 372.7 (215%)                                                                    | 1774.7 (1022%)    | -1973.7 (-1136%)       |
| Mongolia            | 198.9              | 778 (391%)                                                                      | 1469.1 (739%)     | -2048.2 (-1030%)       |
| Tajikistan          | 2762.9             | 255.1 (9%)                                                                      | 1358.8 (49%)      | 1149 (42%)             |

---

|                        |          |                |                |                 |
|------------------------|----------|----------------|----------------|-----------------|
| Turkmenistan           | 2734.2   | 606.7 (22%)    | 1368.6 (50%)   | 758.9 (28%)     |
| Uzbekistan             | 18849.9  | 3212.9 (17%)   | 12195.7 (65%)  | 3441.3 (18%)    |
| <b>Central Europe</b>  | -18760.6 | 17999.9 (-96%) | -5597.6 (30%)  | -31162.9 (166%) |
| Albania                | -304.1   | 485 (-159%)    | -331 (109%)    | -458.1 (151%)   |
| Bosnia and Herzegovina | 119.5    | 902.2 (755%)   | -756.8 (-633%) | -25.9 (-22%)    |
| Bulgaria               | 3540     | 909 (26%)      | -1509 (-43%)   | 4140 (117%)     |
| Croatia                | 466.7    | 689.2 (148%)   | -342.3 (-73%)  | 119.8 (26%)     |
| Czechia                | -871.9   | 1012.1 (-116%) | 168.4 (-19%)   | -2052.4 (235%)  |
| Hungary                | 691.2    | 612.7 (89%)    | -261.5 (-38%)  | 340 (49%)       |
| Montenegro             | 111.3    | 120.9 (109%)   | -1.9 (-2%)     | -7.7 (-7%)      |
| North Macedonia        | 457.8    | 394.2 (86%)    | 102.9 (22%)    | -39.3 (-9%)     |
| Poland                 | -9121    | 5379.6 (-59%)  | 272.8 (-3%)    | -14773.4 (162%) |
| Romania                | -14105   | 5301.3 (-38%)  | -4349.2 (31%)  | -15057.1 (107%) |

---



---

|                       |          |                  |                 |                 |
|-----------------------|----------|------------------|-----------------|-----------------|
| Serbia                | 716.9    | 1887.5 (263%)    | -477.4 (-67%)   | -693.2 (-97%)   |
| Slovakia              | -436     | 680.8 (-156%)    | 91.6 (-21%)     | -1208.4 (277%)  |
| Slovenia              | -25.8    | 277.5 (-1076%)   | 43.2 (-167%)    | -346.5 (1343%)  |
| <b>Eastern Europe</b> | -1587.1  | 18095.5 (-1140%) | -11191.2 (705%) | -8491.4 (535%)  |
| Belarus               | 1796.9   | 516.5 (29%)      | -315.7 (-18%)   | 1596.1 (89%)    |
| Estonia               | 782.8    | 223.2 (29%)      | -138.2 (-18%)   | 697.8 (89%)     |
| Latvia                | 839.4    | 271.3 (32%)      | -382.7 (-46%)   | 950.8 (113%)    |
| Lithuania             | 664.6    | 377.6 (57%)      | -385 (-58%)     | 672 (101%)      |
| Republic of Moldova   | 1111.4   | 386.4 (35%)      | -319.4 (-29%)   | 1044.4 (94%)    |
| Russian Federation    | -19716.8 | 14562.2 (-74%)   | -3402.1 (17%)   | -30876.9 (157%) |
| Ukraine               | 12934.6  | 2400 (19%)       | -3446.5 (-27%)  | 13981.1 (108%)  |
| <b>Australasia</b>    | 14900.2  | 6409.7 (43%)     | 6567.5 (44%)    | 1923 (13%)      |
| Australia             | 12245.9  | 5424.6 (44%)     | 5687.5 (46%)    | 1133.8 (9%)     |

---

---

|                                  |          |                 |               |                  |
|----------------------------------|----------|-----------------|---------------|------------------|
| New Zealand                      | 2654.4   | 1012.7 (38%)    | 864.7 (33%)   | 777 (29%)        |
| <b>High-income Asia Pacific</b>  | -9333    | 21379.1 (-229%) | 5855.2 (-63%) | -36567.3 (392%)  |
| Brunei Darussalam                | 158.8    | 64.8 (41%)      | 141.1 (89%)   | -47.1 (-30%)     |
| Japan                            | 5838.1   | 19462.6 (333%)  | 928.1 (16%)   | -14552.6 (-249%) |
| Republic of Korea                | -13627   | 6279.7 (-46%)   | 3771.3 (-28%) | -23678 (174%)    |
| Singapore                        | 752.6    | 659.3 (88%)     | 1403.4 (186%) | -1310.1 (-174%)  |
| <b>High-income North America</b> | 132661.3 | 33093.9 (25%)   | 62866 (47%)   | 36701.4 (28%)    |
| Canada                           | 9313.1   | 3913.1 (42%)    | 3885.6 (42%)  | 1514.4 (16%)     |
| Greenland                        | 12.6     | 11.8 (94%)      | 0.5 (4%)      | 0.3 (2%)         |
| United States of America         | 142507.6 | 37255.3 (26%)   | 56513.8 (40%) | 48738.5 (34%)    |
| <b>Southern Latin America</b>    | 16559.3  | 6431.3 (39%)    | 10499.2 (63%) | -371.2 (-2%)     |
| Argentina                        | 11313.5  | 3530.1 (31%)    | 8193.4 (72%)  | -410 (-4%)       |

---

---

|                       |         |               |               |                 |
|-----------------------|---------|---------------|---------------|-----------------|
| Chile                 | 5186.6  | 2401.5 (46%)  | 2296.6 (44%)  | 488.5 (9%)      |
| Uruguay               | 261     | 114.8 (44%)   | 131.9 (51%)   | 14.3 (5%)       |
| <b>Western Europe</b> | 57176   | 45995.5 (80%) | 23234.3 (41%) | -12053.8 (-21%) |
| Andorra               | 17.3    | 10.3 (60%)    | 10.7 (62%)    | -3.7 (-21%)     |
| Austria               | 3361.6  | 951.1 (28%)   | 578.3 (17%)   | 1832.2 (55%)    |
| Belgium               | 1077.1  | 823.9 (76%)   | 553.2 (51%)   | -300 (-28%)     |
| Cyprus                | 252.1   | 220 (87%)     | 316.5 (126%)  | -284.4 (-113%)  |
| Denmark               | 1107.6  | 263.2 (24%)   | 237.6 (21%)   | 606.8 (55%)     |
| Finland               | 606     | 291.6 (48%)   | 122.6 (20%)   | 191.8 (32%)     |
| France                | 4911.6  | 5721.1 (116%) | 2840.4 (58%)  | -3649.9 (-74%)  |
| Germany               | 26137.1 | 12748.4 (49%) | 2879.6 (11%)  | 10509.1 (40%)   |
| Greece                | 1151.9  | 3279.3 (285%) | -29 (-3%)     | -2098.4 (-182%) |
| Iceland               | 142.4   | -10.7 (-8%)   | 36.9 (26%)    | 116.2 (82%)     |

---

---

|             |        |                |               |                   |
|-------------|--------|----------------|---------------|-------------------|
| Ireland     | 365.3  | 337.8 (92%)    | 454.7 (124%)  | -427.2 (-117%)    |
| Israel      | 2439.2 | 654.9 (27%)    | 2020.7 (83%)  | -236.4 (-10%)     |
| Italy       | 3455.3 | 10178.3 (295%) | 1914.8 (55%)  | -8637.8 (-250%)   |
| Luxembourg  | 102.5  | 21 (20%)       | 94.9 (93%)    | -13.4 (-13%)      |
| Malta       | 91.6   | 90.1 (98%)     | 34.9 (38%)    | -33.4 (-36%)      |
| Monaco      | 5.7    | 0.5 (9%)       | 2.5 (44%)     | 2.7 (47%)         |
| Netherlands | 2376.9 | 1461.5 (61%)   | 737.2 (31%)   | 178.2 (7%)        |
| Norway      | 661.5  | 133.4 (20%)    | 398.2 (60%)   | 129.9 (20%)       |
| Portugal    | 1404.6 | 2397.8 (171%)  | 334.1 (24%)   | -1327.3 (-94%)    |
| San Marino  | 4.4    | 1.6 (36%)      | 2.2 (50%)     | 0.6 (14%)         |
| Spain       | 752.1  | 7456.2 (991%)  | 3599.6 (479%) | -10303.7 (-1370%) |
| Sweden      | 1916.5 | 386.3 (20%)    | 591 (31%)     | 939.2 (49%)       |
| Switzerland | 1319   | 420.3 (32%)    | 537.6 (41%)   | 361.1 (27%)       |

---

---

|                                  |         |               |               |                |
|----------------------------------|---------|---------------|---------------|----------------|
| United Kingdom                   | 3563.7  | 2124.3 (60%)  | 3120.4 (88%)  | -1681 (-47%)   |
| <b>Andean Latin America</b>      | 57039.5 | 17266.7 (30%) | 36448.6 (64%) | 3324.2 (6%)    |
| Bolivia (Plurinational State of) | 13669.2 | 3554.7 (26%)  | 10375.7 (76%) | -261.2 (-2%)   |
| Ecuador                          | 26565.2 | 5391.7 (20%)  | 11467.4 (43%) | 9706.1 (37%)   |
| Peru                             | 16805.1 | 8012.2 (48%)  | 15344 (91%)   | -6551.1 (-39%) |
| <b>Caribbean</b>                 | 46084   | 11530.3 (25%) | 18471.3 (40%) | 16082.4 (35%)  |
| Antigua and Barbuda              | 129.4   | 36.8 (28%)    | 56 (43%)      | 36.6 (28%)     |
| Bahamas                          | 528.9   | 171.2 (32%)   | 231.7 (44%)   | 126 (24%)      |
| Barbados                         | 311.9   | 112.9 (36%)   | 75.9 (24%)    | 123.1 (39%)    |
| Belize                           | 795.9   | 118 (15%)     | 382.8 (48%)   | 295.1 (37%)    |
| Bermuda                          | 22.6    | 26 (115%)     | 6.3 (28%)     | -9.7 (-43%)    |
| Cuba                             | 7956.7  | 2945.7 (37%)  | 631.1 (8%)    | 4379.9 (55%)   |

---

---

|                                  |         |               |                |                |
|----------------------------------|---------|---------------|----------------|----------------|
| Dominica                         | 89.3    | 45.2 (51%)    | -12.3 (-14%)   | 56.4 (63%)     |
| Dominican Republic               | 11917.8 | 2521.5 (21%)  | 4905.7 (41%)   | 4490.6 (38%)   |
| Grenada                          | 170.5   | 68.5 (40%)    | 46.3 (27%)     | 55.7 (33%)     |
| Guyana                           | 1243.8  | 449.4 (36%)   | 18.6 (1%)      | 775.8 (62%)    |
| Haiti                            | 10989.8 | 1217.6 (11%)  | 12015.7 (109%) | -2243.5 (-20%) |
| Jamaica                          | 3453    | 1077 (31%)    | 741.7 (21%)    | 1634.3 (47%)   |
| Puerto Rico                      | 2625.2  | 2672.5 (102%) | -100.6 (-4%)   | 53.3 (2%)      |
| Saint Kitts and Nevis            | 100.9   | 47.1 (47%)    | 56.2 (56%)     | -2.4 (-2%)     |
| Saint Lucia                      | 268     | 138.6 (52%)   | 80.8 (30%)     | 48.6 (18%)     |
| Saint Vincent and the Grenadines | 163     | 80.7 (50%)    | 8.1 (5%)       | 74.2 (46%)     |
| Suriname                         | 1128.6  | 267.5 (24%)   | 450.1 (40%)    | 411 (36%)      |
| Trinidad and Tobago              | 2480.4  | 939.6 (38%)   | 385 (16%)      | 1155.8 (47%)   |

---

---

|                                    |          |                |                |                 |
|------------------------------------|----------|----------------|----------------|-----------------|
| United States Virgin Islands       | 123.7    | 74.2 (60%)     | -2 (-2%)       | 51.5 (42%)      |
| <b>Central Latin America</b>       | 552438.2 | 142749.4 (26%) | 178709 (32%)   | 230979.8 (42%)  |
| Colombia                           | 17281.4  | 13204 (76%)    | 17057.8 (99%)  | -12980.4 (-75%) |
| Costa Rica                         | 5899.1   | 1716.1 (29%)   | 2039.2 (35%)   | 2143.8 (36%)    |
| El Salvador                        | 20376.1  | 4228.3 (21%)   | 2736.2 (13%)   | 13411.6 (66%)   |
| Guatemala                          | 33127.6  | 3814.4 (12%)   | 20571.7 (62%)  | 8741.5 (26%)    |
| Honduras                           | 14331.7  | 2712.3 (19%)   | 8571.7 (60%)   | 3047.7 (21%)    |
| Mexico                             | 390049.2 | 100453.6 (26%) | 103444.1 (27%) | 186151.5 (48%)  |
| Nicaragua                          | 18078.1  | 4646.4 (26%)   | 6897.5 (38%)   | 6534.2 (36%)    |
| Panama                             | 5024.4   | 884.2 (18%)    | 2214.7 (44%)   | 1925.5 (38%)    |
| Venezuela (Bolivarian Republic of) | 48270.5  | 13659.9 (28%)  | 13853.6 (29%)  | 20757 (43%)     |
| <b>Tropical Latin America</b>      | 113693.1 | 72685.7 (64%)  | 82901.1 (73%)  | -41893.7 (-37%) |

---

---

|                                     |          |                |                |                 |
|-------------------------------------|----------|----------------|----------------|-----------------|
| Brazil                              | 105175.8 | 71194.9 (68%)  | 79565.6 (76%)  | -45584.7 (-43%) |
| Paraguay                            | 8517.1   | 1561.8 (18%)   | 3262.9 (38%)   | 3692.4 (43%)    |
| <b>North Africa and Middle East</b> | 161759.8 | 40451.6 (25%)  | 143928 (89%)   | -22619.8 (-14%) |
| Afghanistan                         | 13676.3  | -3082.1 (-23%) | 21929.8 (160%) | -5171.4 (-38%)  |
| Algeria                             | 9965.7   | 3914.1 (39%)   | 9036.1 (91%)   | -2984.5 (-30%)  |
| Bahrain                             | 519.8    | 113.2 (22%)    | 380.5 (73%)    | 26.1 (5%)       |
| Egypt                               | 30443.4  | 4277.7 (14%)   | 25267.5 (83%)  | 898.2 (3%)      |
| Iran (Islamic Republic of)          | 13055.6  | 7463.4 (57%)   | 11448.1 (88%)  | -5855.9 (-45%)  |
| Iraq                                | 15464.3  | 2306.9 (15%)   | 16263.9 (105%) | -3106.5 (-20%)  |
| Jordan                              | 8025.4   | 1162.8 (14%)   | 5296 (66%)     | 1566.6 (20%)    |
| Kuwait                              | 879.7    | 216 (25%)      | 991 (113%)     | -327.3 (-37%)   |
| Lebanon                             | 1072.5   | 425.2 (40%)    | 981.2 (91%)    | -333.9 (-31%)   |

---



---

|                      |                 |                       |                       |                         |
|----------------------|-----------------|-----------------------|-----------------------|-------------------------|
| Libya                | 2298.3          | 789.9 (34%)           | 1324.9 (58%)          | 183.5 (8%)              |
| Morocco              | 11002.5         | 3015.7 (27%)          | 5187.5 (47%)          | 2799.3 (25%)            |
| Oman                 | 955.7           | 113.5 (12%)           | 649.1 (68%)           | 193.1 (20%)             |
| Palestine            | 1258.5          | 161.1 (13%)           | 1614 (128%)           | -516.6 (-41%)           |
| Qatar                | 888.6           | 69.6 (8%)             | 794.6 (89%)           | 24.4 (3%)               |
| Saudi Arabia         | 20592.4         | 4955.5 (24%)          | 13554.4 (66%)         | 2082.5 (10%)            |
| Sudan                | 9570            | -3.7 (0%)             | 11892.2 (124%)        | -2318.5 (-24%)          |
| Syrian Arab Republic | -723.8          | 1961.1 (-271%)        | 1291 (-178%)          | -3975.9 (549%)          |
| Tunisia              | 3059.6          | 1402.4 (46%)          | 1611.8 (53%)          | 45.4 (1%)               |
| Turkey               | 7991.2          | 8951.6 (112%)         | 10977.6 (137%)        | -11938 (-149%)          |
| United Arab Emirates | 7414.6          | 1284.9 (17%)          | 5872.9 (79%)          | 256.8 (3%)              |
| Yemen                | 7206.1          | 664.4 (9%)            | 6567.8 (91%)          | -26.1 (0%)              |
| <b>South Asia</b>    | <b>817761.3</b> | <b>258440.9 (32%)</b> | <b>717200.8 (88%)</b> | <b>-157880.4 (-19%)</b> |

---

---

|                                       |          |                 |                 |                   |
|---------------------------------------|----------|-----------------|-----------------|-------------------|
| Bangladesh                            | 8407.7   | 4677.5 (56%)    | 31373.6 (373%)  | -27643.4 (-329%)  |
| Bhutan                                | 332.9    | 186.2 (56%)     | 145.5 (44%)     | 1.2 (0%)          |
| India                                 | 517673.4 | 226464.4 (44%)  | 531197.9 (103%) | -239988.9 (-46%)  |
| Nepal                                 | 15505.9  | 4300 (28%)      | 9856.1 (64%)    | 1349.8 (9%)       |
| Pakistan                              | 275841.4 | 10030 (4%)      | 162796.4 (59%)  | 103015 (37%)      |
| <b>East Asia</b>                      | 98228.9  | 183347.7 (187%) | 125780.1 (128%) | -210898.9 (-215%) |
| China                                 | 85689.2  | 175233.9 (204%) | 120387.7 (140%) | -209932.4 (-245%) |
| Democratic People's Republic of Korea | 4348.3   | 2428.7 (56%)    | 3379.7 (78%)    | -1460.1 (-34%)    |
| Taiwan (Province of China)            | 8191.4   | 6077.1 (74%)    | 2051.1 (25%)    | 63.2 (1%)         |
| <b>Oceania</b>                        | 6655.8   | 335.7 (5%)      | 4648.9 (70%)    | 1671.2 (25%)      |
| American Samoa                        | 45.4     | 13.2 (29%)      | 8.6 (19%)       | 23.6 (52%)        |
| Cook Islands                          | 7.7      | 4.7 (61%)       | -0.6 (-8%)      | 3.6 (47%)         |

---

---

|                                  |        |             |              |               |
|----------------------------------|--------|-------------|--------------|---------------|
| Fiji                             | 516.4  | 158.9 (31%) | 152.4 (30%)  | 205.1 (40%)   |
| Guam                             | 110.4  | 22.6 (20%)  | 27.4 (25%)   | 60.4 (55%)    |
| Kiribati                         | 94.9   | 10.3 (11%)  | 58.1 (61%)   | 26.5 (28%)    |
| Marshall Islands                 | 45.1   | 16.2 (36%)  | 12 (27%)     | 16.9 (37%)    |
| Micronesia (Federated States of) | 103    | 20.5 (20%)  | -1.1 (-1%)   | 83.6 (81%)    |
| Nauru                            | 5.3    | 0.9 (17%)   | 0.5 (9%)     | 3.9 (74%)     |
| Niue                             | 0.4    | 0.5 (125%)  | -0.8 (-200%) | 0.7 (175%)    |
| Northern Mariana Islands         | 29     | 21.2 (73%)  | -2.9 (-10%)  | 10.7 (37%)    |
| Palau                            | 22.8   | 9.3 (41%)   | 5.1 (22%)    | 8.4 (37%)     |
| Papua New Guinea                 | 3643.6 | 169.5 (5%)  | 2910.9 (80%) | 563.2 (15%)   |
| Samoa                            | 102.6  | 24.8 (24%)  | 43.7 (43%)   | 34.1 (33%)    |
| Solomon Islands                  | 226.7  | 78.1 (34%)  | 352.4 (155%) | -203.8 (-90%) |

---

---

|                                  |          |               |                |                 |
|----------------------------------|----------|---------------|----------------|-----------------|
| Tokelau                          | 0.3      | 0.2 (67%)     | -0.2 (-67%)    | 0.3 (100%)      |
| Tonga                            | 45       | 12.1 (27%)    | 4.6 (10%)      | 28.3 (63%)      |
| Tuvalu                           | 6.1      | 0.9 (15%)     | 3 (49%)        | 2.2 (36%)       |
| Vanuatu                          | 219.6    | 22.8 (10%)    | 112.8 (51%)    | 84 (38%)        |
| <b>Southeast Asia</b>            | 162985.2 | 43652.3 (27%) | 139671.7 (86%) | -20338.8 (-12%) |
| Cambodia                         | 1938.7   | 737.9 (38%)   | 3391.4 (175%)  | -2190.6 (-113%) |
| Indonesia                        | 47747.7  | 14207.9 (30%) | 51056 (107%)   | -17516.2 (-37%) |
| Lao People's Democratic Republic | 1434.2   | 425.7 (30%)   | 2475.8 (173%)  | -1467.3 (-102%) |
| Malaysia                         | 8388     | 2020.9 (24%)  | 5776 (69%)     | 591.1 (7%)      |
| Maldives                         | 104.6    | 46.6 (45%)    | 154.6 (148%)   | -96.6 (-92%)    |
| Mauritius                        | 1164.2   | 362.3 (31%)   | 196.8 (17%)    | 605.1 (52%)     |
| Myanmar                          | 4812.4   | 1795.2 (37%)  | 11796.8 (245%) | -8779.6 (-182%) |

---

---

|                                  |                          |              |                |                 |
|----------------------------------|--------------------------|--------------|----------------|-----------------|
| Philippines                      | 67109.1                  | 9009.1 (13%) | 41015.1 (61%)  | 17084.9 (25%)   |
| Seychelles                       | 52                       | 10.8 (21%)   | 19.4 (37%)     | 21.8 (42%)      |
| Sri Lanka                        | 3775.6                   | 1486.6 (39%) | 2388.6 (63%)   | -99.6 (-3%)     |
| Thailand                         | 7778.3                   | 7353.8 (95%) | 8873.2 (114%)  | -8448.7 (-109%) |
| Timor-Leste                      | 235.8                    | 31.8 (13%)   | 277.8 (118%)   | -73.8 (-31%)    |
| Viet Nam                         | 18236.8                  | 6473.3 (35%) | 13274.3 (73%)  | -1510.8 (-8%)   |
| <b>Central Africa</b>            | <b>Sub-Saharan</b> 57951 | 1016.9 (2%)  | 88175.7 (152%) | -31241.6 (-54%) |
| Angola                           | 14805.7                  | -271.8 (-2%) | 22539.5 (152%) | -7462 (-50%)    |
| Central African Republic         | 3652.3                   | 75.5 (2%)    | 3842.3 (105%)  | -265.5 (-7%)    |
| Congo                            | 2461.6                   | 457.7 (19%)  | 3873.1 (157%)  | -1869.2 (-76%)  |
| Democratic Republic of the Congo | 35095.9                  | 923.9 (3%)   | 55236.8 (157%) | -21064.8 (-60%) |
| Equatorial Guinea                | 791                      | -0.9 (0%)    | 1180.3 (149%)  | -388.4 (-49%)   |

---

---

|                       |                    |          |                |                  |                  |
|-----------------------|--------------------|----------|----------------|------------------|------------------|
| Gabon                 |                    | 1144.5   | 158.6 (14%)    | 1164.8 (102%)    | -178.9 (-16%)    |
| <b>Eastern Africa</b> | <b>Sub-Saharan</b> | 182116.5 | 7482.1 (4%)    | 275384.7 (151%)  | -100750.3 (-55%) |
| Burundi               |                    | 4205.5   | -24.8 (-1%)    | 8384.3 (199%)    | -4154 (-99%)     |
| Comoros               |                    | 338.3    | 110.5 (33%)    | 311.8 (92%)      | -84 (-25%)       |
| Djibouti              |                    | 986.9    | 127.2 (13%)    | 777.9 (79%)      | 81.8 (8%)        |
| Eritrea               |                    | 4811.9   | 478.1 (10%)    | 4694.1 (98%)     | -360.3 (-7%)     |
| Ethiopia              |                    | -1647.7  | 2151.1 (-131%) | 78030.1 (-4736%) | -81828.9 (4966%) |
| Kenya                 |                    | 32810.3  | 4042.7 (12%)   | 24240.9 (74%)    | 4526.7 (14%)     |
| Madagascar            |                    | 8338.3   | 487 (6%)       | 16842.9 (202%)   | -8991.6 (-108%)  |
| Malawi                |                    | 14923.3  | -34.9 (0%)     | 13473.5 (90%)    | 1484.7 (10%)     |
| Mozambique            |                    | 19549.9  | -674.3 (-3%)   | 18812.1 (96%)    | 1412.1 (7%)      |
| Rwanda                |                    | 1725.4   | 987.9 (57%)    | 7507.2 (435%)    | -6769.7 (-392%)  |

---

---

|                                    |         |               |                |                |
|------------------------------------|---------|---------------|----------------|----------------|
| Somalia                            | 16321.6 | 20.4 (0%)     | 17524.8 (107%) | -1223.6 (-7%)  |
| South Sudan                        | 2860.4  | -12.9 (0%)    | 3819.8 (134%)  | -946.5 (-33%)  |
| Uganda                             | 23829.1 | -388.6 (-2%)  | 22769.7 (96%)  | 1448 (6%)      |
| United Republic of Tanzania        | 48799.7 | 1065 (2%)     | 43020.7 (88%)  | 4714 (10%)     |
| Zambia                             | 11703.8 | 378.2 (3%)    | 15284.3 (131%) | -3958.7 (-34%) |
| <b>Southern Sub-Saharan Africa</b> | 47969.4 | 16010 (33%)   | 33214.9 (69%)  | -1255.5 (-3%)  |
| Botswana                           | 2117.4  | 476.7 (23%)   | 1130.6 (53%)   | 510.1 (24%)    |
| Eswatini                           | 1180    | 243.6 (21%)   | 458.7 (39%)    | 477.7 (40%)    |
| Lesotho                            | 2211.8  | 308.2 (14%)   | 379.1 (17%)    | 1524.5 (69%)   |
| Namibia                            | 943.5   | 199.3 (21%)   | 812.7 (86%)    | -68.5 (-7%)    |
| South Africa                       | 31345.5 | 13134.1 (42%) | 26327.9 (84%)  | -8116.5 (-26%) |
| Zimbabwe                           | 10171.2 | 1446.1 (14%)  | 4143.2 (41%)   | 4581.9 (45%)   |

---

---

|                       |                    |          |               |                 |                 |
|-----------------------|--------------------|----------|---------------|-----------------|-----------------|
| <b>Western Africa</b> | <b>Sub-Saharan</b> | 266931.6 | -5753.5 (-2%) | 377277.1 (141%) | -104592 (-39%)  |
| Benin                 |                    | 9565.3   | 99.3 (1%)     | 11374.4 (119%)  | -1908.4 (-20%)  |
| Burkina Faso          |                    | 18920.2  | -228.4 (-1%)  | 17720.8 (94%)   | 1427.8 (8%)     |
| Cabo Verde            |                    | 276.6    | 65.3 (24%)    | 192.6 (70%)     | 18.7 (7%)       |
| Cameroon              |                    | 27697.7  | 758.1 (3%)    | 28749.1 (104%)  | -1809.5 (-7%)   |
| Chad                  |                    | 12560    | -627.3 (-5%)  | 14191.9 (113%)  | -1004.6 (-8%)   |
| Côte d'Ivoire         |                    | 15945.4  | 1268 (8%)     | 18363 (115%)    | -3685.6 (-23%)  |
| Gambia                |                    | 3470.2   | -236.8 (-7%)  | 3470.3 (100%)   | 236.7 (7%)      |
| Ghana                 |                    | 26724.4  | 2728.8 (10%)  | 23022.9 (86%)   | 972.7 (4%)      |
| Guinea                |                    | 7914.3   | -520.6 (-7%)  | 11550.1 (146%)  | -3115.2 (-39%)  |
| Guinea-Bissau         |                    | 865      | 84.6 (10%)    | 1891.2 (219%)   | -1110.8 (-128%) |
| Liberia               |                    | 2383.1   | 11.4 (0%)     | 4709.3 (198%)   | -2337.6 (-98%)  |

---



---

|                       |         |               |                 |                 |
|-----------------------|---------|---------------|-----------------|-----------------|
| Mali                  | 13388.1 | -549.4 (-4%)  | 21790.6 (163%)  | -7853.1 (-59%)  |
| Mauritania            | 618     | 163.1 (26%)   | 2767.1 (448%)   | -2312.2 (-374%) |
| Niger                 | 12473.2 | -114.8 (-1%)  | 23382.9 (187%)  | -10794.9 (-87%) |
| Nigeria               | 98824.2 | -7647.9 (-8%) | 172246.4 (174%) | -65774.3 (-67%) |
| Sao Tome and Principe | 164.9   | 19.2 (12%)    | 161 (98%)       | -15.3 (-9%)     |
| Senegal               | 6780.9  | 773.4 (11%)   | 11827.4 (174%)  | -5819.9 (-86%)  |
| Sierra Leone          | 5201.2  | -199.9 (-4%)  | 6815.3 (131%)   | -1414.2 (-27%)  |
| Togo                  | 5059.6  | 615.6 (12%)   | 5820.7 (115%)   | -1376.7 (-27%)  |

---

Supplemental Table 8. Frontier age-standardized disability-adjusted life-years and corresponding effective difference of CKD due to glomerulonephritis in 2019 in 204 countries or territories

| Location            | Sociodemographic-index | Age-standardized disability-adjusted life-years | Frontier age-standardized disability-adjusted life-years | Effective difference | Trend of age-standardized disability-adjusted life-years from 1990 to 2019 | Effective difference rank (Age-standardized disability-adjusted life-years rank) |
|---------------------|------------------------|-------------------------------------------------|----------------------------------------------------------|----------------------|----------------------------------------------------------------------------|----------------------------------------------------------------------------------|
| Afghanistan         | 34.3                   | 103.6                                           | 51.7                                                     | 51.9                 | Decrease                                                                   | 89 (106)                                                                         |
| Albania             | 68.1                   | 52                                              | 18.8                                                     | 33.2                 | Decrease                                                                   | 62 (57)                                                                          |
| Algeria             | 65.2                   | 60.6                                            | 18.8                                                     | 41.8                 | Decrease                                                                   | 74 (74)                                                                          |
| American Samoa      | 71.2                   | 157.6                                           | 19.1                                                     | 138.5                | Increase                                                                   | 160 (150)                                                                        |
| Andorra             | 89.4                   | 26.9                                            | 9                                                        | 17.9                 | Decrease                                                                   | 26 (17)                                                                          |
| Angola              | 47                     | 133.2                                           | 30.6                                                     | 102.7                | Decrease                                                                   | 130 (128)                                                                        |
| Antigua and Barbuda | 74.3                   | 215.5                                           | 19                                                       | 196.5                | Increase                                                                   | 184 (183)                                                                        |
| Argentina           | 70.8                   | 64.1                                            | 19.1                                                     | 45                   | Decrease                                                                   | 81 (80)                                                                          |

---

|            |      |       |      |       |          |           |
|------------|------|-------|------|-------|----------|-----------|
| Armenia    | 68.9 | 46.2  | 18.7 | 27.4  | Increase | 45 (44)   |
| Australia  | 83.9 | 55.9  | 12.6 | 43.4  | Increase | 78 (67)   |
| Austria    | 84.9 | 37.2  | 10.1 | 27    | Increase | 42 (32)   |
| Azerbaijan | 68.3 | 85.7  | 18.9 | 66.8  | Increase | 98 (95)   |
| Bahrain    | 75.1 | 54.6  | 18.9 | 35.6  | Decrease | 66 (63)   |
| Bangladesh | 48.3 | 60    | 29.2 | 30.8  | Decrease | 55 (72)   |
| Barbados   | 74.2 | 158.6 | 19.1 | 139.5 | Increase | 162 (153) |
| Belarus    | 74.5 | 34.4  | 18.9 | 15.6  | Increase | 23 (28)   |
| Belgium    | 85.1 | 23.7  | 9.9  | 13.8  | Decrease | 18 (13)   |
| Belize     | 60.3 | 276.9 | 19.1 | 257.9 | Increase | 195 (194) |
| Benin      | 35.2 | 168.9 | 51.4 | 117.5 | Decrease | 148 (162) |
| Bermuda    | 81.3 | 91.6  | 14.7 | 76.8  | Decrease | 106 (99)  |
| Bhutan     | 45.5 | 123.1 | 32.8 | 90.4  | Increase | 117 (118) |

---

---

|                        |      |       |      |       |          |           |
|------------------------|------|-------|------|-------|----------|-----------|
| Bolivia                | 56.6 | 248.6 | 19.3 | 229.3 | Increase | 193 (193) |
| Bosnia and Herzegovina | 71.8 | 51.1  | 19   | 32.1  | Decrease | 60 (54)   |
| Botswana               | 63.4 | 158.4 | 18.6 | 139.8 | Increase | 163 (152) |
| Brazil                 | 64   | 112.9 | 19.1 | 93.7  | Decrease | 119 (111) |
| Brunei                 | 82.3 | 85.9  | 14.7 | 71.2  | Decrease | 100 (96)  |
| Bulgaria               | 76.4 | 87.8  | 16.3 | 71.4  | Increase | 101 (98)  |
| Burkina Faso           | 25.7 | 165.9 | 54.3 | 111.6 | Increase | 141 (159) |
| Burundi                | 28.4 | 152.1 | 52.7 | 99.4  | Decrease | 128 (140) |
| Côte d'Ivoire          | 40.8 | 150.6 | 42.1 | 108.6 | Decrease | 134 (138) |
| Cambodia               | 46.9 | 50.3  | 30.5 | 19.8  | Decrease | 33 (51)   |
| Cameroon               | 49   | 180.1 | 29.4 | 150.7 | Decrease | 168 (168) |
| Canada                 | 87.3 | 33.6  | 9    | 24.6  | Increase | 38 (26)   |

---

---

|                          |      |       |      |       |          |           |
|--------------------------|------|-------|------|-------|----------|-----------|
| Cape Verde               | 52.5 | 104.7 | 29.3 | 75.4  | Increase | 104 (108) |
| Central African Republic | 27.4 | 194.1 | 52.9 | 141.2 | Decrease | 164 (175) |
| Chad                     | 23.8 | 168.7 | 58.7 | 110.1 | Decrease | 137 (161) |
| Chile                    | 75.9 | 45.4  | 17.2 | 28.3  | Increase | 51 (42)   |
| China                    | 68.6 | 37.5  | 19   | 18.5  | Decrease | 29 (33)   |
| Colombia                 | 63.3 | 103.5 | 18.8 | 84.7  | Decrease | 111 (105) |
| Comoros                  | 45.5 | 144.3 | 32.9 | 111.4 | Decrease | 140 (135) |
| Congo<br>(Brazzaville)   | 56.8 | 152.5 | 19.2 | 133.3 | Decrease | 157 (142) |
| Cook Islands             | 76.4 | 86.4  | 16.3 | 70.1  | Increase | 99 (97)   |
| Costa Rica               | 68   | 158   | 19.1 | 138.9 | Increase | 161 (151) |
| Croatia                  | 79.4 | 38.4  | 14.7 | 23.7  | Increase | 37 (35)   |
| Cuba                     | 66.8 | 104   | 19.1 | 84.9  | Increase | 112 (107) |

---

---

|                    |      |       |      |       |          |           |
|--------------------|------|-------|------|-------|----------|-----------|
| Cyprus             | 84.1 | 39.8  | 12.1 | 27.7  | Decrease | 47 (37)   |
| Czech Republic     | 82.8 | 27.5  | 14.5 | 12.9  | Decrease | 16 (20)   |
| Denmark            | 89   | 27.4  | 9.1  | 18.3  | Increase | 27 (19)   |
| Djibouti           | 45.9 | 155.5 | 32.5 | 122.9 | Increase | 153 (145) |
| Dominica           | 72.9 | 302.5 | 18.9 | 283.6 | Increase | 199 (199) |
| Dominican Republic | 59.2 | 181.1 | 19   | 162.1 | Increase | 172 (169) |
| DR Congo           | 38.2 | 131.1 | 45.6 | 85.6  | Decrease | 113 (127) |
| Ecuador            | 64   | 228.2 | 19.1 | 209.1 | Increase | 190 (188) |
| Egypt              | 65.8 | 78    | 19   | 59    | Increase | 96 (91)   |
| El Salvador        | 57.3 | 444.9 | 19.4 | 425.5 | Increase | 203 (203) |
| Equatorial Guinea  | 68.5 | 139.6 | 18.9 | 120.7 | Decrease | 151 (132) |
| Eritrea            | 39.6 | 170.4 | 42.5 | 127.8 | Decrease | 155 (164) |

---

---

|                                   |      |       |      |       |          |           |
|-----------------------------------|------|-------|------|-------|----------|-----------|
| Estonia                           | 83.5 | 54.6  | 13.8 | 40.8  | Increase | 72 (64)   |
| eSwatini                          | 57.7 | 225.5 | 19.2 | 206.3 | Increase | 189 (187) |
| Ethiopia                          | 34.3 | 127.7 | 51.7 | 76    | Decrease | 105 (123) |
| Federated States of<br>Micronesia | 58   | 212.5 | 18.9 | 193.6 | Increase | 183 (179) |
| Fiji                              | 66.4 | 127.1 | 19   | 108.2 | Increase | 132 (121) |
| Finland                           | 85.6 | 16.6  | 9.2  | 7.4   | Increase | 6 (2)     |
| France                            | 83.4 | 20    | 13.8 | 6.2   | Decrease | 4 (6)     |
| Gabon                             | 65.6 | 182.3 | 19.1 | 163.2 | Decrease | 173 (170) |
| Georgia                           | 70.2 | 62    | 19   | 43    | Increase | 77 (75.5) |
| Georgia                           | 84.1 | 62    | 12.2 | 49.9  | Increase | 86 (75.5) |
| Germany                           | 89.8 | 34.6  | 9    | 25.6  | Increase | 40 (30)   |
| Ghana                             | 55.7 | 172.8 | 19.1 | 153.7 | Increase | 170 (165) |

---

---

|               |      |       |      |       |          |           |
|---------------|------|-------|------|-------|----------|-----------|
| Greece        | 79.4 | 41.8  | 14.8 | 27.1  | Decrease | 44 (38)   |
| Greenland     | 76.1 | 48.1  | 17.1 | 31    | Increase | 56 (48)   |
| Grenada       | 66.9 | 291.5 | 18.9 | 272.6 | Increase | 196 (196) |
| Guam          | 81.3 | 102.1 | 14.7 | 87.4  | Increase | 114 (103) |
| Guatemala     | 52.6 | 324.9 | 29.5 | 295.4 | Increase | 200 (201) |
| Guinea        | 32.5 | 193.7 | 51.8 | 141.9 | Decrease | 166 (174) |
| Guinea-Bissau | 35.5 | 219.3 | 50.5 | 168.8 | Decrease | 176 (185) |
| Guyana        | 61.8 | 320.4 | 19   | 301.4 | Increase | 201 (200) |
| Haiti         | 43.2 | 241.1 | 41.9 | 199.1 | Decrease | 185 (192) |
| Honduras      | 49.6 | 285.1 | 29.6 | 255.6 | Increase | 194 (195) |
| Hungary       | 79.1 | 30.1  | 14.7 | 15.3  | Increase | 22 (23)   |
| Iceland       | 86.9 | 18    | 9.1  | 9     | Increase | 8 (4)     |
| India         | 56.6 | 103.2 | 19.2 | 84.1  | Decrease | 110 (104) |

---



---

|            |      |       |      |       |          |           |
|------------|------|-------|------|-------|----------|-----------|
| Indonesia  | 66   | 66.8  | 18.9 | 47.9  | Decrease | 84 (83)   |
| Iran       | 67   | 46    | 19   | 27    | Decrease | 41 (43)   |
| Iraq       | 67.1 | 82.5  | 19   | 63.5  | Decrease | 97 (94)   |
| Ireland    | 86.7 | 24.7  | 9    | 15.7  | Decrease | 24 (15)   |
| Israel     | 80.3 | 42.3  | 14.7 | 27.6  | Decrease | 46 (39)   |
| Italy      | 80.1 | 27.3  | 14.7 | 12.5  | Decrease | 15 (18)   |
| Jamaica    | 68.4 | 201   | 18.9 | 182.1 | Increase | 180 (178) |
| Japan      | 87   | 23.6  | 9    | 14.6  | Decrease | 19 (12)   |
| Jordan     | 73.1 | 76.9  | 19   | 57.9  | Decrease | 94 (89)   |
| Kazakhstan | 72.3 | 59.5  | 18.9 | 40.6  | Increase | 71 (71)   |
| Kenya      | 50.8 | 144.7 | 29.4 | 115.2 | Increase | 146 (136) |
| Kiribati   | 52.7 | 173.7 | 29.3 | 144.4 | Increase | 167 (166) |
| Kuwait     | 85.1 | 38.2  | 10   | 28.2  | Decrease | 50 (34)   |

---

---

|            |      |       |      |       |          |           |
|------------|------|-------|------|-------|----------|-----------|
| Kyrgyzstan | 59.6 | 72.7  | 18.9 | 53.8  | Decrease | 90 (87)   |
| Laos       | 49   | 80.5  | 29.5 | 51    | Decrease | 88 (93)   |
| Latvia     | 82   | 53.7  | 14.7 | 39    | Increase | 68 (59)   |
| Lebanon    | 70.8 | 51.1  | 19   | 32.1  | Decrease | 59 (53)   |
| Lesotho    | 50.7 | 213   | 29.6 | 183.5 | Increase | 181 (181) |
| Liberia    | 37   | 160.8 | 48   | 112.8 | Decrease | 142 (156) |
| Libya      | 70.9 | 64    | 18.9 | 45.2  | Increase | 82 (79)   |
| Lithuania  | 84.3 | 42.4  | 11.7 | 30.6  | Increase | 54 (40)   |
| Luxembourg | 89.5 | 27.7  | 9    | 18.7  | Decrease | 30 (21)   |
| Madagascar | 39.6 | 124.2 | 42.4 | 81.8  | Decrease | 108 (120) |
| Malawi     | 38.4 | 154.3 | 44.9 | 109.4 | Decrease | 136 (144) |
| Malaysia   | 73.7 | 47.7  | 18.9 | 28.8  | Increase | 53 (47)   |
| Maldives   | 56.2 | 51.7  | 19.3 | 32.4  | Decrease | 61 (55)   |

---

---

|                  |      |       |      |       |          |           |
|------------------|------|-------|------|-------|----------|-----------|
| Mali             | 26.3 | 168.2 | 53.5 | 114.8 | Decrease | 145 (160) |
| Malta            | 80.1 | 33.2  | 14.8 | 18.5  | Decrease | 28 (24)   |
| Marshall Islands | 54.4 | 156.2 | 19.6 | 136.6 | Increase | 159 (148) |
| Mauritania       | 49.6 | 130   | 29.7 | 100.4 | Decrease | 129 (126) |
| Mauritius        | 70.5 | 123.2 | 19.2 | 104   | Increase | 131 (119) |
| Mexico           | 64.9 | 406   | 19   | 387   | Increase | 202 (202) |
| Moldova          | 69.6 | 50.3  | 19.1 | 31.2  | Increase | 57 (50)   |
| Monaco           | 90.2 | 20.7  | 9    | 11.7  | Increase | 12 (7)    |
| Mongolia         | 60.6 | 95.8  | 18.7 | 77.1  | Decrease | 107 (100) |
| Montenegro       | 79.1 | 72    | 14.7 | 57.3  | Decrease | 93 (86)   |
| Morocco          | 54.8 | 60.5  | 19.3 | 41.2  | Increase | 73 (73)   |
| Mozambique       | 30.7 | 163   | 52.1 | 111   | Increase | 139 (157) |
| Myanmar          | 52.1 | 79.6  | 29.4 | 50.2  | Decrease | 87 (92)   |

---

---

|                          |      |       |       |       |          |           |
|--------------------------|------|-------|-------|-------|----------|-----------|
| Namibia                  | 61.2 | 110   | 18.9  | 91.1  | Decrease | 118 (110) |
| Nauru                    | 61.8 | 194.5 | 18.9  | 175.6 | Increase | 177 (176) |
| Nepal                    | 42.2 | 116.5 | 42    | 74.6  | Increase | 103 (117) |
| Netherlands              | 88.3 | 22.5  | 9     | 13.5  | Decrease | 17 (9)    |
| New Zealand              | 84   | 66.9  | 12.1  | 54.8  | Increase | 91 (84)   |
| Nicaragua                | 51.7 | 458.9 | 29.6  | 429.4 | Increase | 204 (204) |
| Niger                    | 16.2 | 151.2 | 146.6 | 4.6   | Decrease | 2 (139)   |
| Nigeria                  | 51.5 | 152.4 | 29.7  | 122.7 | Decrease | 152 (141) |
| Niue                     | 71.1 | 134.9 | 19    | 115.9 | Increase | 147 (129) |
| North Korea              | 55.8 | 54.3  | 19.3  | 35    | Decrease | 64 (61)   |
| North Macedonia          | 74.4 | 58.4  | 19    | 39.4  | Decrease | 70 (70)   |
| Northern Mariana Islands | 77.1 | 142.7 | 15.4  | 127.3 | Increase | 154 (134) |

---

---

|                  |      |       |      |       |          |           |
|------------------|------|-------|------|-------|----------|-----------|
| Norway           | 91.3 | 24.8  | 9.1  | 15.7  | Increase | 25 (16)   |
| Oman             | 78.3 | 38.4  | 14.8 | 23.6  | Increase | 36 (36)   |
| Pakistan         | 44.9 | 234   | 33.5 | 200.5 | Increase | 187 (190) |
| Palau            | 73.8 | 197.5 | 19.1 | 178.4 | Increase | 179 (177) |
| Palestine        | 58.8 | 67.9  | 19.4 | 48.4  | Decrease | 85 (85)   |
| Panama           | 68.6 | 169.7 | 18.8 | 150.9 | Increase | 169 (163) |
| Papua New Guinea | 39.4 | 64.9  | 42.6 | 22.3  | Increase | 34 (81)   |
| Paraguay         | 63.8 | 183.5 | 19.1 | 164.4 | Increase | 175 (171) |
| Peru             | 64.8 | 129.3 | 19   | 110.3 | Decrease | 138 (125) |
| Philippines      | 62.3 | 108.7 | 18.9 | 89.8  | Increase | 116 (109) |
| Poland           | 80.2 | 34.5  | 14.8 | 19.7  | Decrease | 32 (29)   |
| Portugal         | 74.3 | 34.4  | 19.1 | 15.3  | Decrease | 21 (27)   |
| Puerto Rico      | 81.4 | 156   | 14.7 | 141.3 | Increase | 165 (146) |

---

---

|                                  |      |       |      |       |          |           |
|----------------------------------|------|-------|------|-------|----------|-----------|
| Qatar                            | 83   | 56.6  | 14.3 | 42.4  | Decrease | 75 (68)   |
| Romania                          | 76   | 55.5  | 17   | 38.5  | Decrease | 67 (66)   |
| Russia                           | 80.5 | 62.2  | 14.7 | 47.5  | Decrease | 83 (77)   |
| Rwanda                           | 42.9 | 135.7 | 41.9 | 93.7  | Decrease | 120 (130) |
| Saint Kitts and Nevis            | 14.0 | 293.3 | 19   | 274.3 | Decrease | 198 (198) |
| Saint Lucia                      | 67   | 224.3 | 18.9 | 205.4 | Increase | 188 (186) |
| Saint Vincent and the Grenadines | 62.7 | 235.7 | 19   | 216.7 | Increase | 192 (191) |
| Samoa                            | 64.1 | 127.2 | 18.9 | 108.3 | Increase | 133 (122) |
| San Marino                       | 88.4 | 17.2  | 9    | 8.1   | Increase | 7 (3)     |
| Saudi Arabia                     | 80.5 | 98.1  | 14.8 | 83.4  | Increase | 109 (102) |
| Senegal                          | 38.9 | 163.4 | 43.6 | 119.8 | Decrease | 149 (158) |
| Serbia                           | 76.7 | 54.8  | 15.8 | 39    | Decrease | 69 (65)   |

---

---

|                 |      |       |       |       |          |           |
|-----------------|------|-------|-------|-------|----------|-----------|
| Seychelles      | 72.4 | 77.9  | 19    | 58.9  | Increase | 95 (90)   |
| Sierra Leone    | 34.7 | 160.7 | 51.5  | 109.3 | Decrease | 135 (155) |
| Singapore       | 86.1 | 36.1  | 9.1   | 27    | Decrease | 43 (31)   |
| Slovakia        | 81.2 | 33.5  | 14.8  | 18.7  | Decrease | 31 (25)   |
| Slovenia        | 84   | 23.3  | 12.2  | 11.2  | Decrease | 11 (11)   |
| Solomon Islands | 40.7 | 116   | 42    | 73.9  | Decrease | 102 (115) |
| Somalia         | 8.1  | 186.9 | 186.9 | 0     | Decrease | 1 (173)   |
| South Africa    | 67.8 | 153.4 | 18.9  | 134.5 | Decrease | 158 (143) |
| South Korea     | 87.8 | 15.2  | 9     | 6.1   | Decrease | 3 (1)     |
| South Sudan     | 36.3 | 148.7 | 49.6  | 99.1  | Decrease | 127 (137) |
| Spain           | 76.7 | 23.2  | 15.8  | 7.4   | Decrease | 5 (10)    |
| Sri Lanka       | 69   | 50.7  | 19.1  | 31.6  | Decrease | 58 (52)   |
| Sudan           | 51.5 | 74.3  | 29.3  | 45    | Decrease | 80 (88)   |

---

---

|                               |      |       |      |       |          |           |
|-------------------------------|------|-------|------|-------|----------|-----------|
| Suriname                      | 63.6 | 292.4 | 18.9 | 273.5 | Increase | 197 (197) |
| Sweden                        | 87.2 | 23.9  | 9.1  | 14.8  | Increase | 20 (14)   |
| Switzerland                   | 92.9 | 19.1  | 9.1  | 10    | Increase | 10 (5)    |
| Syria                         | 61.9 | 64    | 19.1 | 44.9  | Decrease | 79 (78)   |
| Taiwan (province<br>of China) | 86.8 | 51.9  | 9    | 42.9  | Decrease | 76 (56)   |
| Tajikistan                    | 53.9 | 49.3  | 26.3 | 23    | Increase | 35 (49)   |
| Tanzania                      | 42.3 | 217.6 | 41.9 | 175.7 | Increase | 178 (184) |
| Thailand                      | 68.7 | 53.5  | 18.8 | 34.8  | Decrease | 63 (58)   |
| The Bahamas                   | 79.6 | 213.9 | 14.7 | 199.2 | Increase | 186 (182) |
| The Gambia                    | 39.9 | 156.8 | 42.3 | 114.5 | Decrease | 144 (149) |
| Timor-Leste                   | 51.4 | 57.4  | 29.4 | 28    | Decrease | 49 (69)   |
| Togo                          | 41.7 | 156.1 | 41.9 | 114.2 | Decrease | 143 (147) |

---



---

|                      |      |       |      |       |          |           |
|----------------------|------|-------|------|-------|----------|-----------|
| Tokelau              | 62.6 | 116   | 18.9 | 97.2  | Increase | 124 (116) |
| Tonga                | 63.6 | 114.2 | 18.9 | 95.3  | Increase | 122 (113) |
| Trinidad and Tobago  | 75.7 | 231.9 | 18.4 | 213.6 | Increase | 191 (189) |
| Tunisia              | 67.2 | 54.3  | 19   | 35.4  | Decrease | 65 (62)   |
| Turkey               | 74.8 | 44    | 18.8 | 25.2  | Decrease | 39 (41)   |
| Turkmenistan         | 67   | 115.1 | 18.9 | 96.2  | Increase | 123 (114) |
| Tuvalu               | 58.9 | 139.6 | 19.5 | 120.1 | Increase | 150 (131) |
| Uganda               | 40.4 | 141.3 | 42.3 | 99    | Increase | 126 (133) |
| UK                   | 84.7 | 22.2  | 10.4 | 11.8  | Decrease | 13 (8)    |
| Ukraine              | 73.6 | 46.9  | 19   | 27.8  | Increase | 48 (45)   |
| United Arab Emirates | 88   | 98    | 9    | 89    | Decrease | 115 (101) |
| Uruguay              | 69.7 | 29    | 19   | 10    | Decrease | 9 (22)    |

---

|                |      |       |      |       |          |           |
|----------------|------|-------|------|-------|----------|-----------|
| USA            | 85.9 | 65.9  | 9.3  | 56.7  | Increase | 92 (82)   |
| Uzbekistan     | 63.1 | 113   | 18.9 | 94.1  | Increase | 121 (112) |
| Vanuatu        | 48.5 | 128   | 29.8 | 98.2  | Increase | 125 (124) |
| Venezuela      | 60.7 | 212.5 | 19.1 | 193.5 | Increase | 182 (180) |
| Vietnam        | 61.7 | 47.5  | 19   | 28.5  | Decrease | 52 (46)   |
| Virgin Islands | 79.9 | 178.2 | 14.7 | 163.5 | Increase | 174 (167) |
| Yemen          | 41.2 | 54.1  | 41.9 | 12.2  | Decrease | 14 (60)   |
| Zambia         | 50.5 | 183.9 | 29.5 | 154.4 | Decrease | 171 (172) |
| Zimbabwe       | 47.6 | 158.9 | 29.8 | 129.1 | Increase | 156 (154) |

---

Supplemental Figure 1. Age-standardized incidence (A), prevalence (B), deaths (C) and DALYs (D) rates of CKD due to glomerulonephritis per 100,000 population of in 2019 in 21 regions.

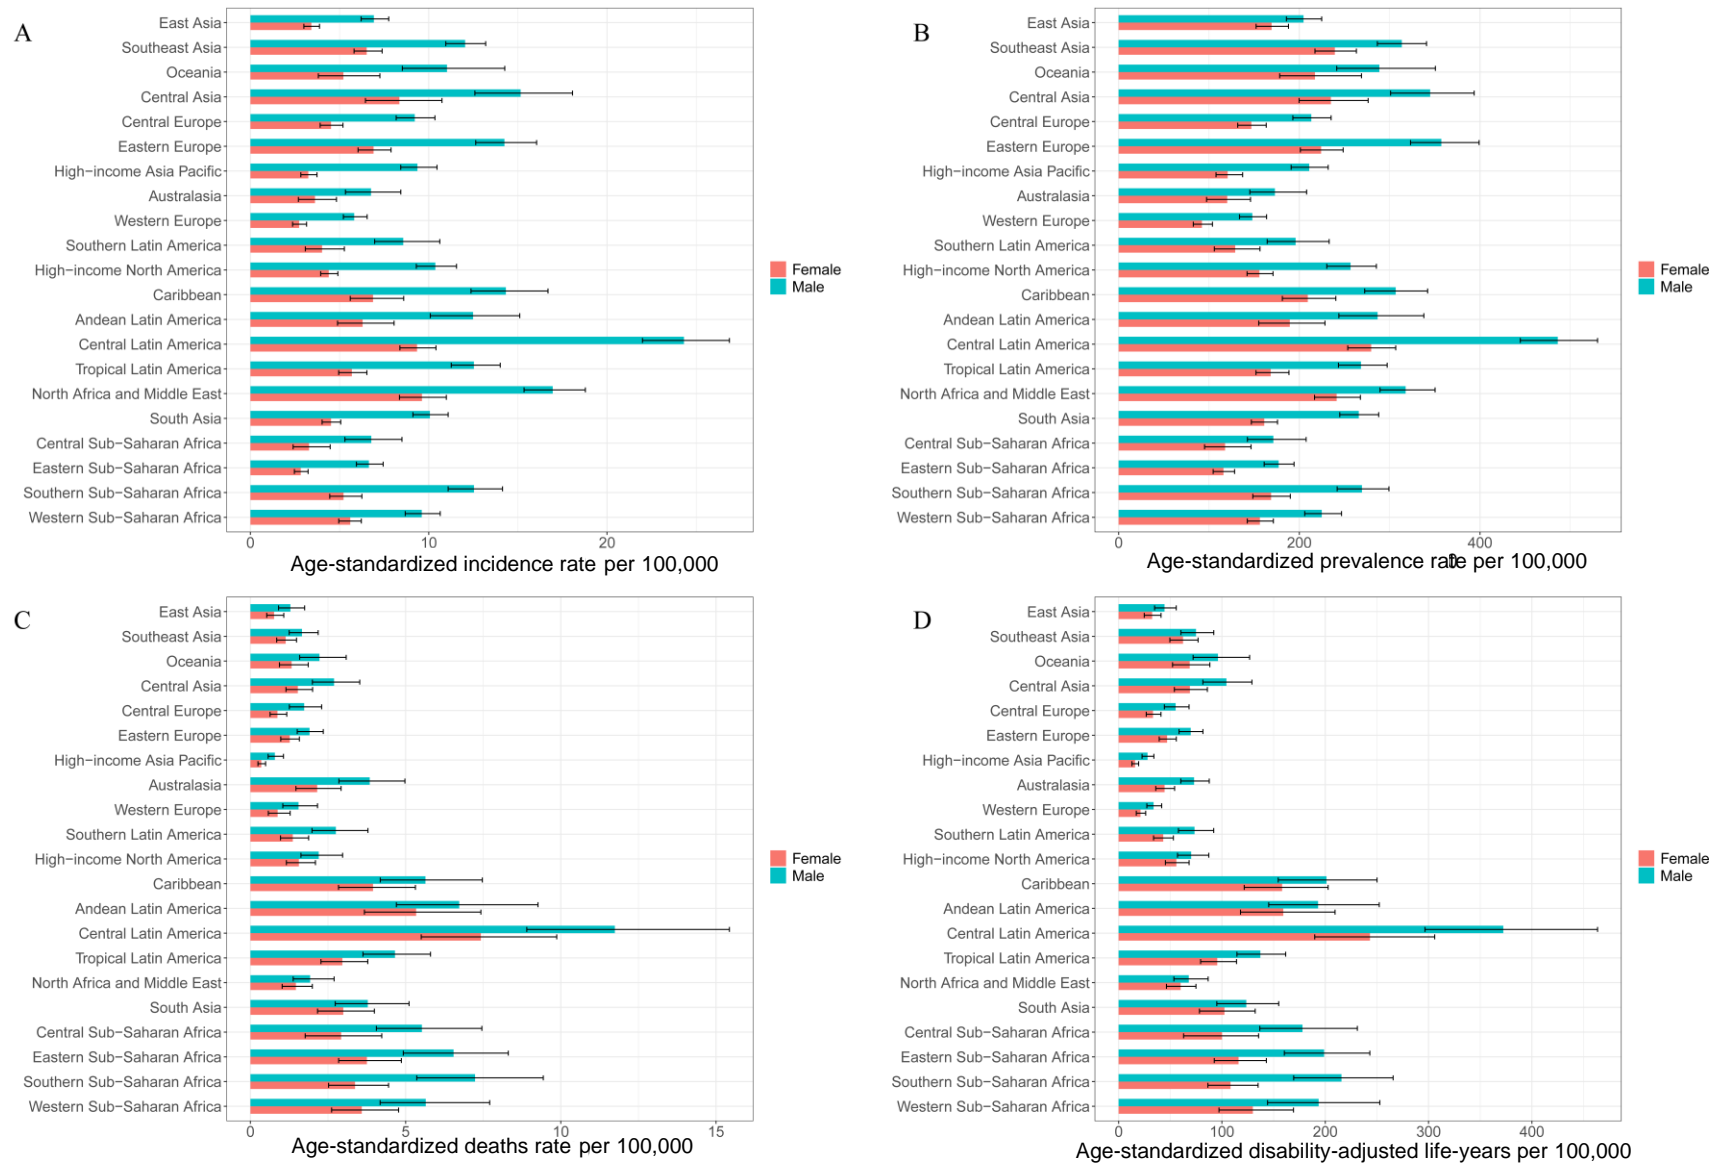

Supplemental Figure 2. Percent change of age-standardized incidence (A), prevalence (B), deaths (C) and DALYs (D) rates of CKD due to glomerulonephritis from 1990 to 2019 in 204 countries and territories, for both sexes.

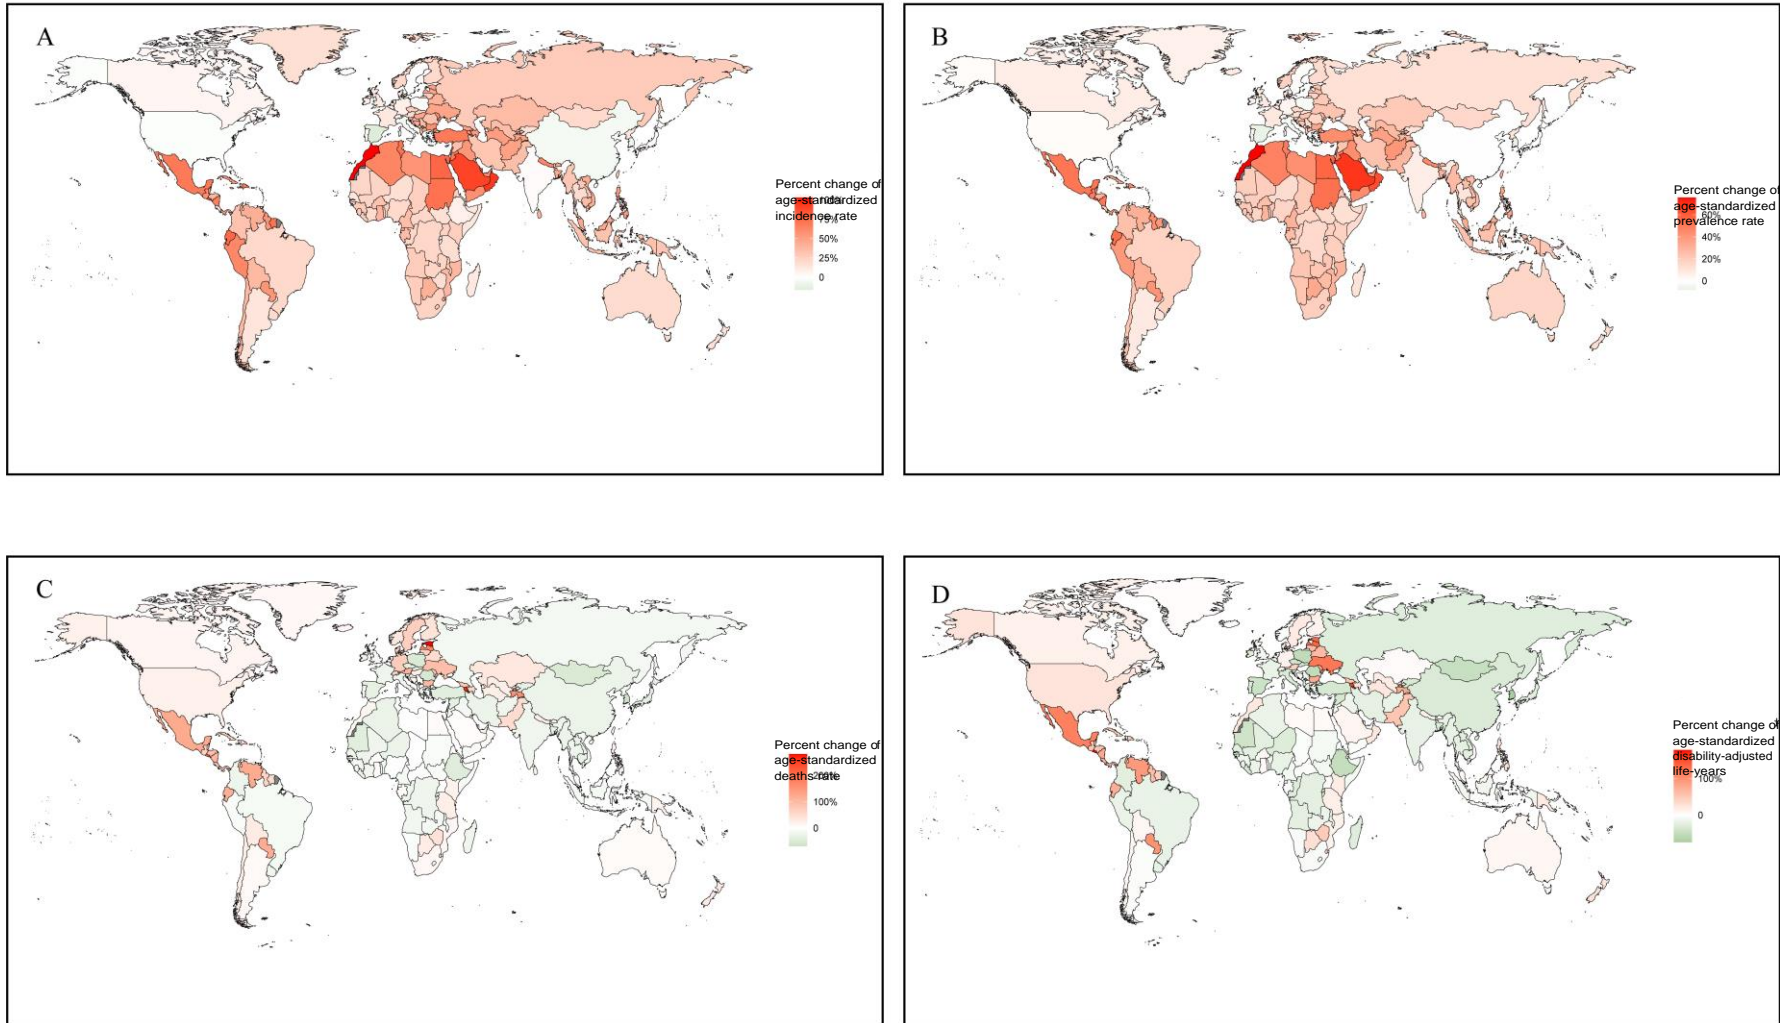

Supplemental Figure 3. Global number of incident cases (A), prevalent cases (B), deaths (C) and DALYs (D) of CKD due to glomerulonephritis in 2019, by sex and age.

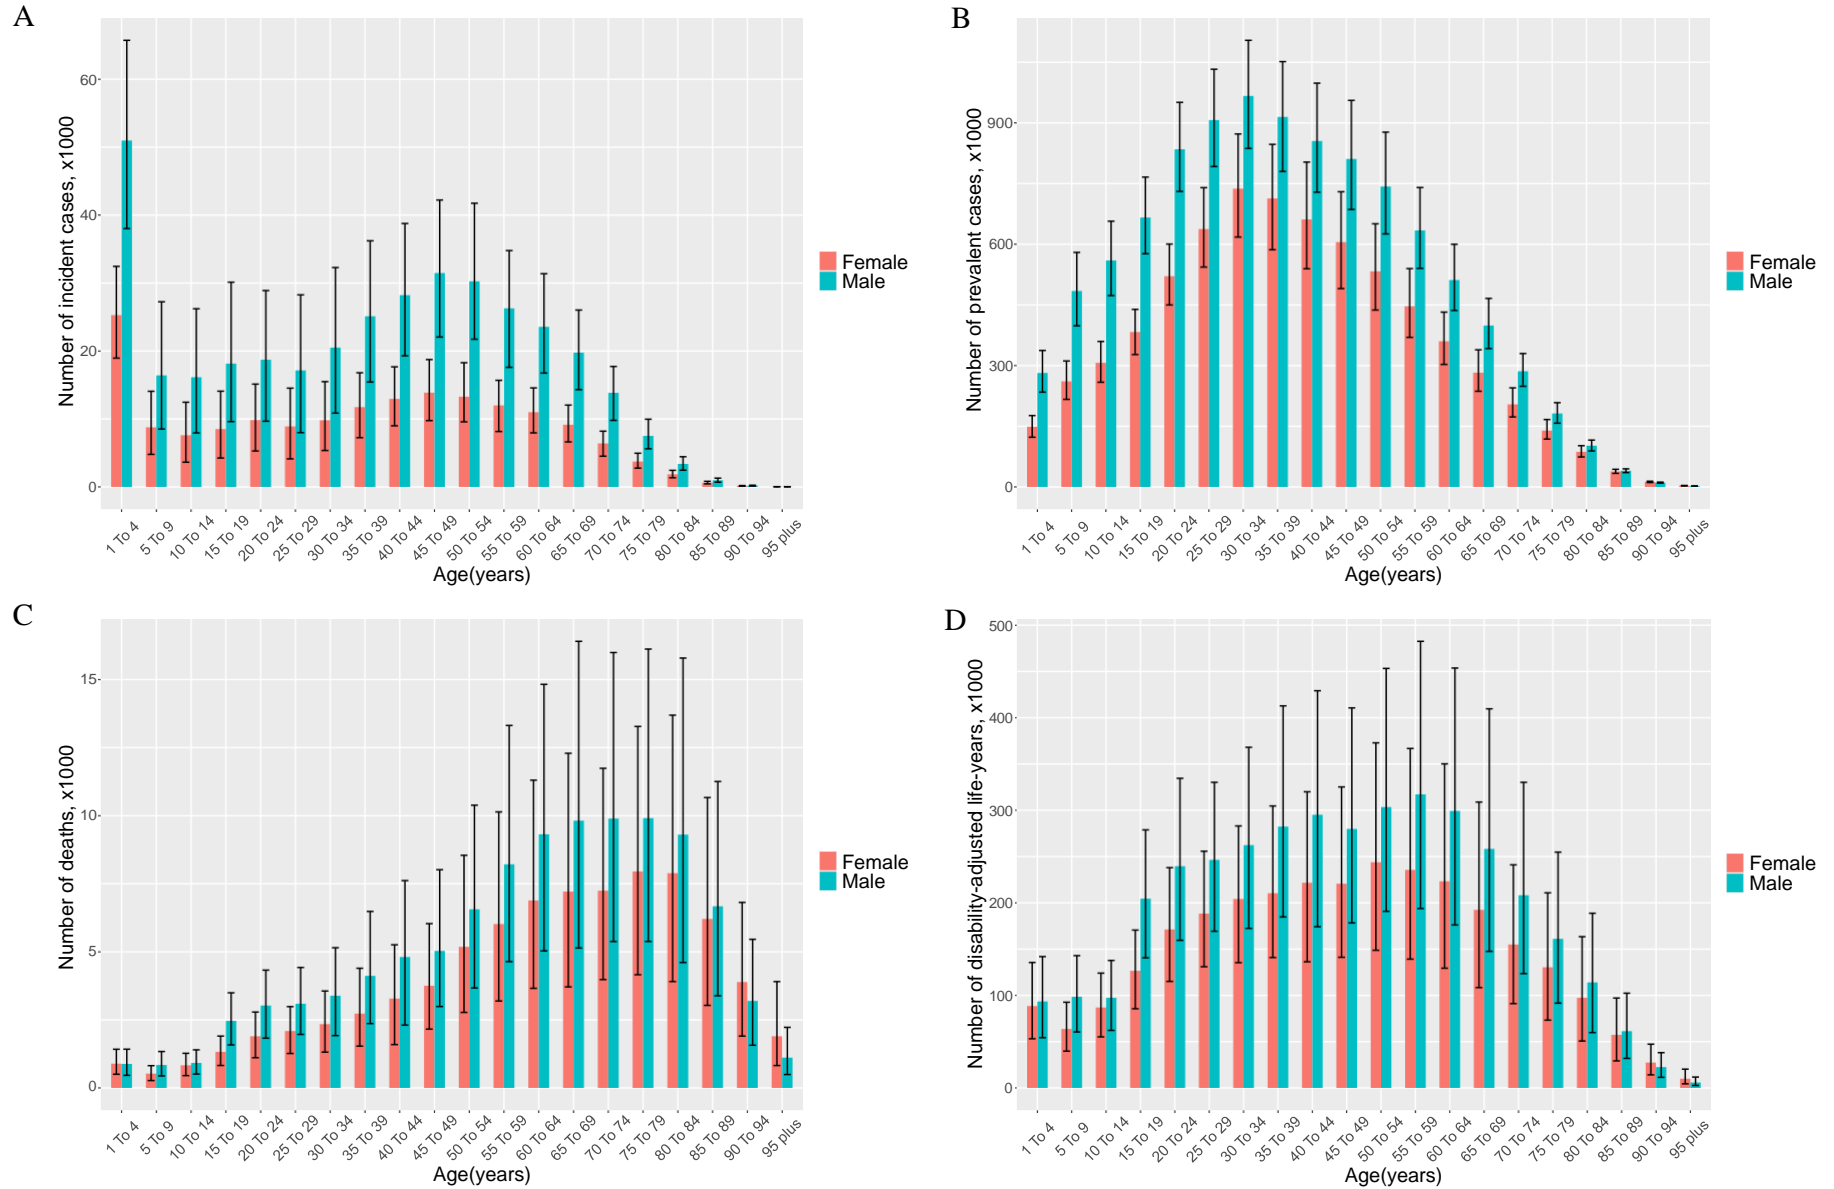

Supplement: cjasn-18-060-s001.pdf [file cjasn-18-060-s001.pdf]
